# Supplementary material
Source: publisher figshare collection journal article supplement (https://acs.figshare.com/ndownloader/files/8500727)
Supplement: Supplementary file 1 [file 8500727]

# Supporting information

## **Rational design of bisubstrate-type analogs as inhibitors of DNA methyltransferases in cancer cells**

Ludovic Halby, Yoann Menon, Elodie Rilova, Dany Pechalrieu, Véronique Masson,  
5 Celine Faux, Mohamed Amine Bouhlel, Marie-Hélène David-Cordonnier, Natacha  
Novosad, Yannick Aussagues, Arnaud Samson, Laurent Lacroix, Frédéric Ausseil,  
Laurence Fleury, Dominique Guianvarc'h, Clotilde Ferroud and Paola B. Arimondo\*

The supporting information contains:

- 10 -detailed synthesis procedures;
- detailed biological assays;
- cytotoxicity data;
- T<sub>m</sub> melting curves;
- DNase footprinting experiments;
- 15 -luciferase reactivation fold data.

## Chemistry

All chemicals were from Sigma-Aldrich or Alfa Aesar.

The NMR spectra were recorded on a Bruker Avance II spectrometer equipped with a  $^{13}\text{C}$  cryoprobe at 500 MHz for  $^1\text{H}$  and 125 MHz for  $^{13}\text{C}$ ; 2D experiments were performed using standard Bruker programs and atoms attribution was performed thanks to 2D correlations. Chemical shifts are given in ppm. Coupling constants  $J$  are measured in Hz. Splitting patterns are designed as follows: s, singlet; bs broad singlet; d, doublet; bd broad doublet; t, triplet; brt, broad triplet; dd, doublet of a doublet; m, multiplet; ddd, doublet of a doublet of a doublet; q, quartet; quint, quintet, sext, sextet.

HRMS-ESI were obtained on a Bruker MicroTOF.

Semi preparative HPLC was performed on an apparatus equipped with a VWR International LaPrep pump P110, a VWR LaPrep P314 Dual I absorbance detector and EZChrom software. C18 reversed-phase column (Waters x-bridge, RP-18, 25 × 250 mm, 5  $\mu\text{m}$ ) were used for semi preparative HPLC with a binary gradient elution (solvent A:  $\text{H}_2\text{O}$  and solvent B:  $\text{CH}_3\text{CN}$ ) or (solvent A:  $\text{H}_2\text{O}/0.01\%$  TEA and solvent B:  $\text{CH}_3\text{CN}/0.01\%$  TEA) or (solvent A:  $\text{H}_2\text{O}/0.01\%$  formic acid and solvent B:  $\text{CH}_3\text{CN}/0.01\%$  formic acid), a flow rate of 25  $\text{mL}\cdot\text{min}^{-1}$  and the chromatogram was monitored at 250 and 320 nm. Fraction purity was verified using reversed-phase HPLC on an X-terra C18 MS column (3.9 × 100 mm; Waters) with a linear gradient acetonitrile in 0.01% TEA (0 to 95%  $\text{CH}_3\text{CN}$ ).

#### 4-(3-phenylpropylamino)-7-(2-chloroethoxy)quinazoline (4)

A solution of **3** (440mg; 2.01mmol) in thionyl chloride (10mL) and a catalytic amount of DMF was boiled for 30min. The solvent was removed and the crude product was dissolved in a solution of phenylpropylamine (570μL; 4.0mmol) in DMF and the mixture was stirred at room temperature for 2h. The mixture was diluted with ethyl acetate and the organic phase was washed with a saturated solution of Na<sub>2</sub>CO<sub>3</sub>, brine and dried over magnesium sulfate. The solvent was removed and the residue was purified by silica gel flash chromatography using a linear gradient of ethyl acetate (0→100% ethyl acetate) in cyclohexane to obtain **4** as a pale brown solid (607mg; 1.70mmol; yield 85%).

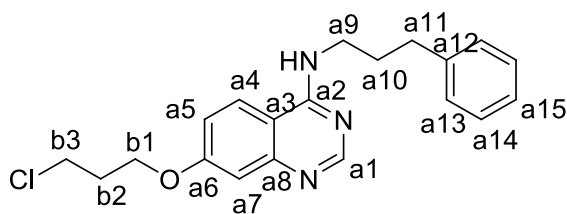

**<sup>1</sup>H NMR (500MHz, CDCl<sub>3</sub>)** δ 8.58 (s, 2H, Ha1), 7.35-7.13 (m, 7H, Ha4 and Ha7 and Ha15 and Ha13 and Ha14), 6.99 (dd, *J*=2.4, 9.0Hz, 1H, Ha5), 5.53 (brs, 1H, HNH), 4.22 (t, *J*=6.0Hz, 2H, Hb1), 3.76 (t, *J*=6.0Hz, 2H, Hb3), 3.70 (q, *J*=7.2Hz, 2H, Ha9), 2.79 (t, *J*=7.2Hz, 2H, Ha11), 2.28 (quint, *J*=6.1Hz, 2H, Ha10), 2.07 (quint, *J*=7.0Hz, 2H, Hb2).

**<sup>13</sup>C NMR (125MHz, CDCl<sub>3</sub>)** δ 162.0 (Ca6), 159.1 (Ca2), 156.1 (Ca1), 151.7 (Ca8), 141.7 (Ca12), 128.8 (Ca13), 128.6 (Ca14), 126.3 (Ca15), 122.0 (Ca4), 117.8 (Ca5), 109.3 (Ca3), 108.1 (Ca7), 64.7 (Cb1), 41.4 (Cb3), 41.3 (Ca9), 33.8 (Ca11), 32.1(Cb2), 30.8 (Ca10).

**HRMS-ESI (m/z)** calculated for C<sub>20</sub>H<sub>23</sub>N<sub>3</sub>ClO [M+H]<sup>+</sup>: 356.1524; Found: 356.1527.

#### 7-((3-phthalimido)propoxy)-4-((3-phenylpropyl)amino)quinazoline (5)

To a solution of **4** (50mg; 141μmol) in DMF (1mL) was added phthalimide potassium salt and the mixture was heated at 90°C for 6h. The mixture was diluted with ethylacetate and the organic phase was washed with a saturated solution of Na<sub>2</sub>CO<sub>3</sub>, brine and dried over magnesium sulfate. The solvent was removed and the residue was purified by silica gel flash chromatography using a linear gradient of ethylacetate (0→100% ethylacetate) in cyclohexane to obtain **5** as a pale yellow solid (63mg; 138μmol; yield 98%).

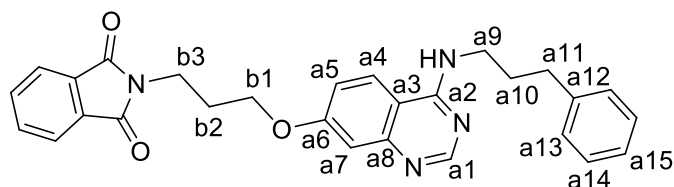

**<sup>1</sup>H NMR (500MHz, CDCl<sub>3</sub>)** δ 8.58 (s, 1H, Ha1), 7.86 (m, 2H, Hphtha), 7.74 (m, 2H, Hphtha), 7.35-7.25 (m, 6H, Ha4 and Ha13 and Ha14 and Ha15), 7.10 (d, *J*=2.5Hz, 1H, Ha7), 6.92 (dd, *J*=2.5, 9.0Hz, 1H, Ha5), 5.47 (brt, *J*=5.1Hz, 1H, HNH), 4.15 (t, *J*=6.3Hz, 2H, Hb1), 3.96 (t, *J*=7.0Hz, 2H, Hb3), 3.72 (q, *J*=6.7Hz, 2H, Ha9), 2.82 (q, *J*=7.3Hz, 2H, Ha11), 2.26 (quint, *J*=6.3Hz, 2H, Hb2), 2.10 (quint, *J*=7.3Hz, 2H, Ha10).

**<sup>13</sup>C NMR (125MHz, CDCl<sub>3</sub>)** δ 168.3 (Cphtha), 162.0 (Ca6), 159.0 (Ca2), 157.8 (Ca1), 151.3 (Ca8), 141.5 (Ca12), 134.0 (Cphtha), 132.1 (Cphtha), 128.7 (Ca13), 128.4 (Ca14), 126.1 (Ca15), 123.3 (Cphtha), 121.8 (Ca4), 117.9 (Ca5), 109.0 (Ca3), 107.6 (Ca7), 65.7 (Cb1), 41.1 (Ca9), 35.3 (Cb3), 33.7 (Ca11), 30.7 (Ca10), 28.0 (Cb2).

**HRMS-ESI (m/z)** calculated for C<sub>28</sub>H<sub>27</sub>N<sub>4</sub>O<sub>3</sub> [M+H]<sup>+</sup>: 467.2078; Found: 467.2078.

**7-((2-nitrobenzenesulfonamido)propyloxy)-4-((3-phenylpropyl)amino)quinazoline (6)**

To a solution of **5** (60mg; 129 $\mu$ mol) in ethanol (2mL), was added *N*-methylhydrazine (200 $\mu$ L). After stirring at room temperature for 18h, the solvent was removed and the residue was co-evaporated with toluene until the *N*-methylhydrazine was completely eliminated. To the crude product was added a solution of 2-nitrobenzene sulfonyl chloride (71mg; 322 $\mu$ mol) and TEA (54 $\mu$ L; 387 $\mu$ mol). The mixture was stirred at room temperature for 3h, then was diluted with ethyl acetate. The organic phase was washed with saturated Na<sub>2</sub>CO<sub>3</sub>, with brine and dried over magnesium sulfate. The solvent was removed and the residue was purified by silica gel flash chromatography using a linear gradient of methanol (0 $\rightarrow$ 10% MeOH) in dichloromethane to obtain **6** as a pale yellow solid (61mg; 117 $\mu$ mol; yield 91%).

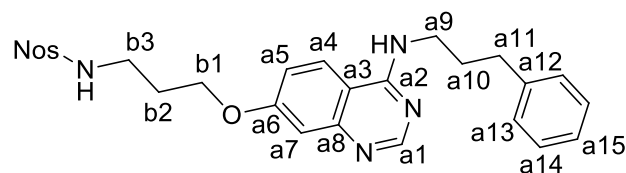

**<sup>1</sup>H NMR (500MHz, CDCl<sub>3</sub>)**  $\delta$  8.59 (s, 1H, Ha1), 8.15 (m, 1H, HNos), 7.83 (m, 1H, HNos), 7.69 (m, 2H, HNos), 7.37-7.30 (m, 3H, Ha4 and Ha13), 7.22-7.15 (m, 3H, Ha14 and Ha15), 7.10-7.05 (m, 2H, Ha7 and Ha5), 5.84 (brt, *J*=5.3Hz, 1H, HNH), 5.51 (brt, *J*=5.4Hz, 1H, HNH), 4.13 (t, *J*=3.4Hz, 2H, Hb1), 3.73 (q, *J*=6.3Hz, 2H, Ha9), 3.42 (q, *J*=6.5Hz, Hb3), 2.82 (q, *J*=6.8Hz, 2H, Ha11), 2.17-2.07 (m, 4H, Ha10 and Hb2).

**<sup>13</sup>C NMR (125MHz, CDCl<sub>3</sub>)**  $\delta$  161.5 (Ca6), 159.0 (Ca2), 155.9 (Ca1), 151.3 (Ca8), 148.0 (CNos), 141.5 (Ca12), 133.6 (CNos), 133.5 (CNos), 132.8 (CNos), 130.9 (CNos), 128.7 (Ca13), 128.4 (Ca14), 126.2 (Ca15), 125.4 (CNos), 122.0 (Ca4), 117.9 (Ca5), 109.2 (Ca3), 107.6 (Ca7), 66.1 (Cb1), 41.8 (Cb3), 41.2 (Ca9), 33.7 (Ca11), 30.7 (Ca10), 28.9 (Cb2).

**HRMS-ESI (m/z)** calculated for C<sub>29</sub>H<sub>37</sub>N<sub>8</sub>O<sub>4</sub> [M+H]<sup>+</sup>: 522.1806; Found: 522.1801.

**4-((3-phenylpropyl)amino)-7-(3-(N<sup>1</sup>-(Bocaminoethyl)-N<sup>2</sup>-(2-nitrobenzenesulfonamido))propyloxy)-4-((3-phenylpropyl)amino)quinazoline (7)**

To a solution of **6** (30mg; 57μmol), TEA (60μL; 440μmol), in DMF (0.3mL) was added 2-  
 5 (N-Boc-amino)ethylbromide (20mg; 70μmol). The mixture was stirred at room temperature overnight. The mixture was diluted with ethyl acetate. The organic phase was washed with water and brine and dried over sodium sulfate. The solvent was removed by vacuum and the residue was purified by silica gel flash chromatography using a linear gradient of ammonia 1N in methanol (0→5% MeOH/NH<sub>3</sub>) in dichloromethane to afford crude **7** as a white foam (35mg,  
 10 53μmol; yield 92%).

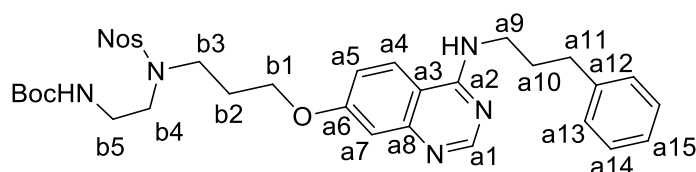

**<sup>1</sup>H NMR (500MHz, DMSO) δ** 8.39 (s, 1H, Ha1), 8.14 (d, *J*=9.2Hz, 1H, Ha4), 8.10 (t, *J*=5.5Hz, HNH), 8.05-8.00 (m, 1H, HNos), 7.97-7.92 (m, 1H, HNos), 7.87-7.76 (m, 2H, HNos), 7.33-7.21 (m, 4H, Ha14 and Ha13), 7.21-7.14 (m, 1H, Ha15), 7.00 (dd, *J*=2.5, 9.1Hz, 1H, Ha5), 6.99 (d, *J*=2.5Hz, 1H, Ha7), 5.94 (brt, *J*=5.8Hz, 1H, HNH), 4.07 (t, *J*=4.2Hz, 2H, Hb1), 3.59-3.46 (m, 4H, Ha9 and Hb3), 3.41-3.31 (m, 2H, Hb4), 3.14 (brq, *J*=6.4Hz, 2H, Hb5), 2.05-1.89 (m, 4H, Ha10 and Hb2), 1.36 (s, 9H, HBoc).

**<sup>13</sup>C NMR (125MHz, DMSO) δ** 161.8 (Ca6), 159.5 (Ca2), 156.1 (Ca1), 156.0 (CBoc), 151.7 (Ca8), 148.0 (CNos), 142.2 (Ca12), 134.9 (CNos), 132.9 (CNos), 132.0 (CNos), 130.2 (CNos), 128.7 (Ca13), 128.4 (Ca14), 126.2 (Ca15), 124.8 (CNos), 124.7 (Ca4), 117.1 (Ca5),

109.6 (Ca3), 107.8 (Ca7), 78.3 (CBoc), 65.4 (Cb1), 47.3 (Cb4), 45.4 (Ca9), 40.6 (Cb3), 39.3 (Cb5), 33.2 (Ca11), 30.8 (Ca10), 28.6 (CBoc), 27.8 (Cb2).

**MS-ESI (m/z)** calculated for C<sub>33</sub>H<sub>40</sub>N<sub>6</sub>O<sub>7</sub>S [M+H]<sup>+</sup>: 664.2679; Found: 664.267.

5      **4-((3-phenylpropyl)amino)-7-(3-(N<sup>1</sup>-(aminoethyl)-N<sup>2</sup>-(2-nitrobenzenesulfonamido))propyloxy)-4-((3-phenylpropyl)amino)quinazoline (8)**

A mixture of **7** (35mg; 53μmol) in TFA (0.5 mL) was stirred at room temperature for 0.5h. TFA was removed by vacuum and the residue was purified by silica gel flash chromatography using a linear gradient of ammonia 1N in methanol (0→10% MeOH/NH<sub>3</sub>) in dichloromethane to afford **8** as a colorless foam (29mg, 51μmol, yield 96%).

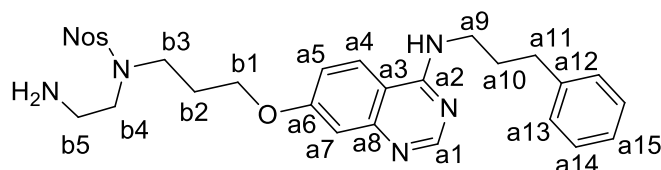

**<sup>1</sup>H NMR (500MHz, DMSO) δ** 8.38 (s, 1H, Ha1), 8.15 (d, *J*=9.3Hz, 1H, Ha4), 8.10 (brt, *J*=5.5Hz, HNH), 8.07-8.00 (m, 1H, HNos), 7.96-7.93 (m, 1H, HNos), 7.85-7.78 (m, 2H, HNos), 7.30-7.17 (m, 4H, Ha14 and Ha13), 7.20-7.16 (m, 1H, Ha15), 7.06 (dd, *J*=2.6, 8.9Hz, 1H, Ha5), 6.99 (d, *J*=2.3Hz, 1H, Ha7), 4.08 (t, *J*=6.1Hz, 2H, Hb1), 3.57-3.47 (m, 4H, Ha9 and Hb3), 3.28 (t, *J*=7.12Hz, Hb4), 2.74-2.65 (m, 4H, Hb5 and Ha11), 2.04-1.90 (m, 4H, Ha10 and Hb2).

**<sup>13</sup>C NMR (125MHz, DMSO) δ** 161.8 (Ca6), 159.5 (Ca2), 156.1 (Ca1), 151.7 (Ca8), 148.0 (CNos), 142.2 (Ca12), 134.8 (CNos), 132.9 (CNos), 132.2 (CNos), 130.2 (CNos), 128.8 (Ca13), 128.7 (Ca14), 126.2 (Ca15), 124.8 (CNos), 124.7 (Ca4), 117.1 (Ca5), 109.6 (Ca3), 107.8

(Ca7), 78.3 (CBoc), 65.5 (Cb1), 50.8 (Cb4), 45.5 (Ca9), 40.7 (Cb3), 39.4 (Cb5), 33.2 (Ca11), 30.8 (Ca10), 27.8 (Cb2).

**MS-ESI (m/z)** calculated for  $C_{28}H_{32}N_6O_5S$   $[M+H]^+$ : 564.2679; Found: 564.22

## 5 **1-(methoxymethyl)uracil (9)**

To a solution of uracil (0.88g; 7.94mmol) in 250 mL of DCM was added N,O-bis(trimethylsilyl)acetamide (4.8mL; 19.4mmol). The mixture was stirred 1h at room temperature. To the reaction mixture was added chloromethylmethyl ether (784 $\mu$ L; 10.32 mmol) and the mixture was stirred 17h at room temperature. The solvent was removed and the residue was purified by silica gel chromatography using the eluent cyclohexane / ethylacetate (7/3) to give **9** (988mg; 7.4mmol; yield 93%) as a white powder.

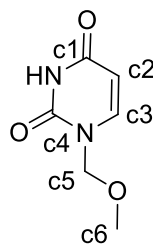

**$^1H$  NMR (500MHz ; DMSO)  $\delta$**  11.32 (s, 1H, HNH) , 7.70 (d,  $J$ =8.0Hz, 1H, Hc3), 5.61 (d,  $J$ =8.0Hz, 1H, Hc2), 5.02 (s, 2H, Hc5), 3.27 (s, 3H, Hc6).

**$^{13}C$  (125MHz, DMSO)  $\delta$**  164.0 (Cc1), 151.5 (Cc4), 145.4 (Cc3), 101.9 (Cc2), 78.0 (Cc5), 56.4 (C6).

**HRMS-ESI(m/z)** calculated for  $C_6H_8N_2NaO_3$   $[M+Na]^+$ : 179.0427 ; Found: 179.0416.



**7-(3-N((2-(N<sup>4</sup>-(1-methoxymethyl)cytosinyl)ethyl)-N<sup>2</sup>-(2-nitrobenzenesulfonamido))propyloxy)-4-((3-phenylpropyl)amino)quinazoline (10)**

To a solution of 1,2,4-triazole (56mg; 0.80mmol) and POCl<sub>3</sub> (24μL; 0.264mmol) in 0.6mL of acetonitrile at 0°C was added TEA 112μL dropwise. The reaction mixture was stirred at 0°C for 40min then 30min at room temperature. **9** (22mg; 121μmol) was added and the mixture was vigorously stirred at room temperature overnight. The solvent was removed and 1mL of a solution of previously prepared **8** (28mg; 50μmol) was added to the residue. The reaction mixture was stirred 6h at RT. The mixture was diluted with ethyl acetate. The organic phase was washed with water and brine and dried over sodium sulfate. The solvent was removed and the residue was purified by silica gel flash chromatography using a linear gradient of ammonia 1N in methanol (0→10% MeOH/NH<sub>3</sub>) in dichloromethane or by reversed phase HPLC using a linear acetonitrile gradient with 0.2% of TEA (0→80% CH<sub>3</sub>CN) to afford **10** (19mg; 27μmol, yield 54%) as a white powder.

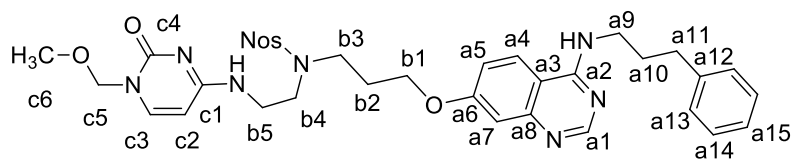

**<sup>1</sup>H NMR (500MHz, DMSO) δ** 8.39 (s, 1H, Ha1), 8.13 (d, *J*=9.5Hz, 1H, Ha4), 8.10-8.07 (m, 2H, HNos and HNH), 7.96-7.89 (m, 1H, HNos and HNH), 7.83-7.76 (m, 2H, HNos), 7.55 (d, *J*=7.4Hz, 1H, Hc3), 7.32-7.22 (m, 4H, Ha14 and Ha13), 7.21-7.16 (m, 1H, Ha15), 7.07 (dd, *J*=2.5, 9.0Hz, 1H, Ha5), 6.98 (d, *J*=2.5Hz, 1H, Ha7), 5.68 (d, *J*=7.4Hz, 1H, Hc2), 5.00 (s, 2H, Hc5), 4.08 (t, *J*=5.9Hz, 2H, Hb1), 3.57-3.47 (m, 8H, Hb5, Hb4, Ha9 and Hb3), 3.24 (s, 3H

Hc6), 2.69 (t,  $J=77\text{Hz}$ , 4H, Ha11), 2.03 (quint,  $J=6.2\text{Hz}$ , 2H, Hb2), 1.95 (quint,  $J=7.4\text{Hz}$ , 2H, Ha10).

$^{13}\text{C}$  NMR (125MHz, DMSO)  $\delta$  164.5 (Cc1), 161.8 (Ca6), 159.5 (Ca2), 156.1 (Ca1), 156.0 (Cc4), 151.7 (Ca8), 148.0 (CNos), 145.1 (Cc3), 142.2 (Ca12), 134.9 (CNos), 133.0 (CNos),  
5 131.8 (CNos), 130.5 (CNos), 128.8 (Ca13), 128.7 (Ca14), 126.2 (Ca15), 124.8 (CNos), 124.7 (Ca4), 117.2 (Ca5), 109.6 (Ca3), 107.8 (Ca7), 95.3 (Cc2), 78.9 (Cc5), 65.4 (Cb1), 56.3 (Cc6), 46.5 (Cb4), 45.3 (Ca9), 40.7 (Cb3), 39.1 (Cb5), 33.2 (Ca11), 30.8 (Ca10), 27.8 (Cb2).

MS-ESI ( $m/z$ ) calculated for  $\text{C}_{34}\text{H}_{38}\text{N}_8\text{O}_7\text{S}$   $[\text{M}+\text{H}]^+$ : 703.27; Found: 703.27.

10 **7-(3-((2-( $\text{N}^4$ -(1-methoxymethyl)cytosinyl)ethyl)amino)propyloxy)-4-((3-phenylpropyl)amino)quinazoline (1)**

To a solution of **10** (15mg;  $21\mu\text{mol}$ ) in acetonitrile (1mL),  $\text{K}_2\text{CO}_3$  (9mg;  $65\mu\text{mol}$ ) and thiophenol (12 $\mu\text{L}$ ;  $120\mu\text{mol}$ ) were added. The mixture was stirred overnight at room temperature then diluted with ethyl acetate. The organic phase was washed with water and brine  
15 and dried over sodium sulfate. The solvent was removed and the residue was purified by silica gel flash chromatography using a linear gradient of ammonia 1N in methanol (0 $\rightarrow$ 10% MeOH/ $\text{NH}_3$ ) in dichloromethane or by reversed phase HPLC using a linear acetonitrile gradient with 0.2% of TEA (0 $\rightarrow$ 80%  $\text{CH}_3\text{CN}$ ) to afford **1** as a white powder (8.0mg;  $15.4\mu\text{mol}$ , yield 73%).

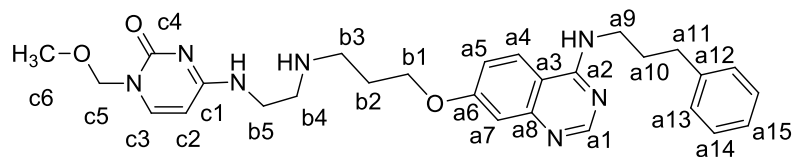

20

**<sup>1</sup>H NMR (500MHz, DMSO) δ** 8.38 (s, 1H, Ha1), 8.15 (d, *J*=9.4 Hz, 1H, Ha4), 8.11 (brt, *J*= 5.4Hz, 2H, HNH), 7.87 (brt, *J*=4.6Hz, 1H, HNH), 7.54 (d, *J*=7.2Hz, 1H, Hc3), 7.32-7.22 (m, 4H, Ha14 and Ha13), 7.21-7.16 (m, 1H, Ha15), 7.10 (dd, *J*=2.7, 9.1Hz, 1H, Ha5), 7.07 (d, *J*=2.5Hz, 1H, Ha7), 5.77 (d, *J*=7.7Hz, 1H, Hc2), 4.99 (s, 2H, Hc5), 4.18 (t, *J*=6.5Hz, 2H, Hb1), 3.52 (brq, *J*=6.5Hz, 2H, Ha9) 3.39 (brq, *J*=5.7Hz, 2H, Hb5), 3.22 (s, 3H Hc6), 2.84-2.76 (m, 4H, Hb4 and Ha9), 2.65 (t, *J*=7.7Hz, 4H, Ha11), 2.03-1.89 (m, 4H, Hb2 and Ha10).

**<sup>13</sup>C NMR (125MHz, DMSO) δ** 164.5 (Cc1), 162.0 (Ca6), 159.5 (Ca2), 156.1 (Ca1), 156.0 (Cc4), 151.8 (Ca8), 144.7 (Cc3), 142.2 (Ca12), 128.8 (Ca13), 128.7 (Ca14), 126.2 (Ca15), 124.7 (Ca4), 117.2 (Ca5), 109.6 (Ca3), 107.9 (Ca7), 95.2 (Cc2), 78.9 (Cc5), 66.3 (Cb1), 56.3 (Cc6), 48.3 (Cb4), 40.6 (Ca9), 45.8 (Cb3), 39.5 (Cb5), 33.2 (Ca11), 30.8 (Ca10), 27.8 (Cb2).

**HRMS-ESI (m/z)** calculated for C<sub>28</sub>H<sub>36</sub>N<sub>8</sub>O<sub>3</sub> [M+H]<sup>+</sup>: 518,2874; Found: 518,2885.

#### 4-((2-Hydroxyethyl)amino)quinoline (**11**)

A mixture of 4-chloroquinoline (360mg; 2.21mmol) in ethanolamine (1.5mL; 22mmol) was stirred at 125°C for 4h. The solvent was removed and the residue was purified by silica gel flash chromatography using a linear gradient of methanol (0→10% MeOH) in dichloromethane to afford **11** as a white powder (414mg; 2.20mmol; quantitative yield).

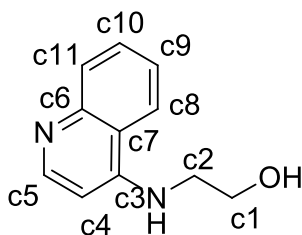

**<sup>1</sup>H NMR (500MHz, CDCl<sub>3</sub>)** δ 8.38 (d, *J*=5.4Hz, 1H, Hc5), 8.19 (dd, *J*=0.9, 8.3Hz, 1H, Hc8), 7.77 (dd, *J*=0.9, 8.3Hz, 1H, Hc11), 7.59 (ddd, *J*=1.3, 6.7, 8.3Hz, 1H, Hc10), 7.40 (ddd, *J*=1.3, 6.7, 8.3Hz, 1H, Hc9), 7.07 (brt, *J*=5.2Hz, 1H, HOH), 6.46 (d, *J*=5.4Hz, 1H, Hc4), 4.83 (brt, *J*=5.5Hz, 1H, HNHc), 3.66 (q, *J*=6.0Hz, 2H, Hc1), 3.35 (q, *J*=5.4Hz, 2H, Hc2).

5 **<sup>13</sup>C NMR (125MHz, CDCl<sub>3</sub>)** δ 151.1 (Cc5), 150.5 (Cc3), 148.8 (Cc6), 129.5 (Cc8), 129.1 (Cc10), 124.2 (Cc9), 122.1 (Cc11), 119.3 (Cc7), 98.6 (Cc4), 59.3 (Cc1), 45.5 (Cc2).

**HRMS-ESI (m/z)** calculated for C<sub>11</sub>H<sub>13</sub>N<sub>2</sub>O [M+H]<sup>+</sup>: 189.1022; found: 189.1031.

#### 4-((2-chloroethyl)amino)quinoline chlorhydrate (**12**)

10 **11** (360mg; 1.92mmol) was solubilized in thionyl chloride (3ml). The mixture was flash boiled and the solvent was removed. Toluene was added to remove the residual thionyl chloride by co-evaporation. The residue was triturated in dichloromethane and the solid was filtrated to afford **12** as a white solid (360mg; 1.75mmol; yield 91%).

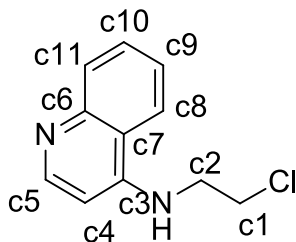

15 **<sup>1</sup>H NMR (500MHz, CDCl<sub>3</sub>)** δ 8.59 (d, *J*=5.2Hz, 1H, Hc5), 8.00 (dd, *J*=0.7, 8.3Hz, 1H, Hc8), 7.79 (d, *J*=8.3Hz, 1H, Hc11), 7.65 (ddd, *J*=1.3, 7.9, 8.3Hz, 1H, Hc10), 7.45 (ddd, *J*=1.3, 7.0, 8.3Hz, 1H, Hc9), 6.43 (d, *J*=5.3Hz, 1H, Hc4), 5.51 (brs, 1H, HNHc), 3.84 (t, *J*=5.8Hz, 2H, Hc1), 3.70 (q, *J*=5.8Hz, 2H, Hc2).

**$^{13}\text{C}$  NMR (125MHz,  $\text{CDCl}_3$ )  $\delta$**  151.0 (Cc5), 148.9 (Cc3), 148.5 (Cc6), 130.0 (Cc8), 129.2 (Cc10), 125.0 (Cc9), 119.3 (Cc11), 118.9 (Cc7), 99.0 (Cc4), 44.4 (Cc2), 42.6 (Cc1).

**HRMS-ESI (m/z)** calculated for  $\text{C}_{11}\text{H}_{13}\text{N}_2\text{Cl}$   $[\text{M}+\text{H}]^+$ : 207.0684; found: 207.0678.

5      **7-(3-((2-(quinolin-4-ylamino)ethyl)amino)propyloxy)-4-((3-phenylpropyl)**  
**amino)quinazoline (14)**

To a solution of **6** (50mg; 96 $\mu\text{mol}$ ),  $\text{K}_2\text{CO}_3$  (22mg; 0.160mmol) and a catalytic amount of KI in DMF (1mL) was added **12** (40mg; 288 $\mu\text{mol}$ ). The mixture was stirred at 65°C overnight then thiophenol (24 $\mu\text{L}$ ; 240mmol) was added. The mixture was stirred for a day then diluted  
10 with ethyl acetate. The organic phase was washed with water and brine and dried over sodium sulfate. The solvent was removed and the residue was purified by silica gel flash chromatography using a linear gradient of ammonia 1N in methanol (0 $\rightarrow$ 10% MeOH/ $\text{NH}_3$ ) in dichloromethane or by reversed phase HPLC using a linear acetonitrile gradient with 0.2% of TEA (0 $\rightarrow$ 80%  $\text{CH}_3\text{CN}$ ) to afford **14** as a white powder (32mg; 0.64mmol, yield 67%).

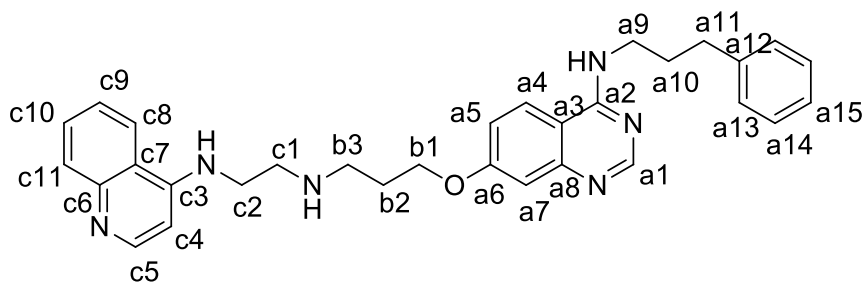

15

**$^1\text{H}$  NMR ((500MHz,  $\text{DMSO}+\text{MeOD}$ )  $\delta$**  8.39 (m, 2H, Ha1 and Hc5), 8.19-8.07 (m, 3H, Hc8, HNH and Ha4), 7.76 (dd,  $J=0.9$ , 8.4Hz, 1H, Hc11), 7.58 (ddd,  $J=1.3$ , 6.7, 8.2Hz, 1H, Hc10), 7.39 (ddd,  $J=1.3$ , 6.7, 8.2Hz, 1H, Hc9), 7.43-7.20 (m, 4H, Ha13 and Ha14), 7.17 (brt,  $J=7.1\text{Hz}$ , Ha15), 7.12-7.04 (m, 3H, Ha7, HNH and Ha5), 6.47 (d,  $J=5.7\text{Hz}$ , 1H, Hc4), 4.17 (t,

$J=6.2\text{Hz}$ , 2H, Hb1), 3.52 (q,  $J=6.9\text{Hz}$ , 2H, Ha9), 3.35 (m, 2H, Hc2), 2.84 (t,  $J=6.6\text{Hz}$ , 2H, Hc1), 2.73 (t,  $J=6.5\text{Hz}$ , 2H, Hb3), 2.67 (t,  $J=7.4\text{Hz}$ , 2H, Ha11), 2.00-1.83 (m, 4H, Ha10 and Hb2).

**$^{13}\text{C}$  NMR (125MHz, DMSO+MeOD)  $\delta$**  162.1 (Ca6), 159.5 (Ca2), 156.1 (Ca1), 151.8  
5 (Ca8), 151.1 (Cc5), 150.4 (Cc3), 148.7 (Cc6), 142.2 (Ca12), 129.5 (Cc11), 129.1 (Cc10), 128.8  
(Ca13), 128.7 (Ca14), 126.2 (Ca15), 124.7 (Ca4), 124.2 (Cc9), 122.0 (Cc8), 119.3 (Cc7), 117.1  
(Ca5), 109.5 (Ca3), 107.8 (Ca7), 98.6 (Cc4), 66.9 (Cb1), 48 (Cc1), 46 (Cb3), 43(Cc2), 40.6  
(Ca9), 33.1 (Ca11), 30.8 (Ca10), 29.8 (Cb2).

**HRMS-ESI (m/z)** calculated for  $\text{C}_{31}\text{H}_{35}\text{N}_6\text{O}$   $[\text{M}+\text{H}]^+$  : 507.2667; found: 507.2666.

10

#### **7-*O*-((*N*-Boc)piperidin-4-ylmethoxy)quinazolinone (16)**

To a mixture of (*N*-Boc)piperidin-4-ylmethanol (1.12g; 5.2mmol) in DMF (2mL) at 0°C under argon was added sodium hydride (125mg, 5.2mmol). The mixture was stirred for 15min at 0°C then **15** (162mg; 1mmol) was added portion wise. The mixture was stirred at 0°C for  
15 10min then at room temperature for 10min, at 60°C for 15min and finally at 110°C for 3h. The reaction mixture was diluted with ethyl acetate and washed with water and brine. The organic phase was dried over magnesium sulfate and the solvent was removed. The crude product was purified by silica gel flash chromatography using a linear gradient of ethyl acetate (0→100% EtOAc) in cyclohexane to afford **16** as a white powder (241mg; 67μmol; yield 67%).

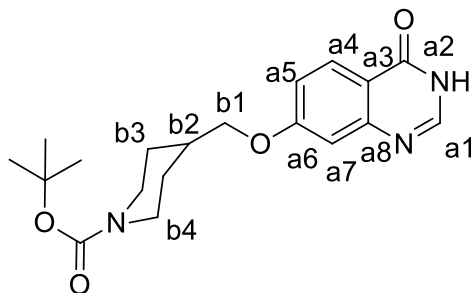

**<sup>1</sup>H NMR (500MHz, CDCl<sub>3</sub>)** δ 11.50 (s, 1H, HNH), 8.19 (d, 1H, *J*= 8.9, Ha4), 8.7 (s, 1H, Ha1), 7.12-7.07 (m, 2H, Ha7 and Ha5), 4.18 (sb, 2H, Hb4), 3.94 (d, *J*= 6.8, 2H, Hb1), 2.76 (m, 2H, Hb4), 2.03 (m, 1H, Hb2), 1.84 (m, 2H, Hb3), 1.47 (s, 9H, HBoc), 1.38-1.11 (m, 2H, Hb3).

5 **<sup>13</sup>C NMR (125MHz, CDCl<sub>3</sub>)** δ 164.6 (Ca6), 162.3 (Ca2), 155.2 (CBoc), 151.5 (Ca8), 144.3 (Ca1), 128.3 (Ca4), 118.0 (Ca5), 116.3 (Ca3), 109.4 (Ca7), 79.9 (CBoc), 73.0 (Cb1), 47.0 (Cb4), 36.3 (Cb2), 29.1 (Cb3), 28.8 (CBoc).

**HRMS-ESI (m/z)** calculated for C<sub>19</sub>H<sub>26</sub>N<sub>3</sub>O<sub>4</sub> [M+H]<sup>+</sup>: 360.1918; found: 360.1911.

10 **4-((3-phenylpropyl)amino)-7-(O-((N-Boc)piperidin-4-ylmethoxy))**  
**quinazoline (17)**

To a solution of 1,2,4-triazole (280mg; 4mmol) and POCl<sub>3</sub> (120μl; 1.32mmol) in 3mL of acetonitrile at 0°C was added TEA (560μL) dropwise. The reaction mixture was stirred at 0°C for 40min then 30min at room temperature. **16** (215mg; 0.6mmol) was added and the mixture  
 15 was vigorously stirred at room temperature overnight. The reaction was followed by TLC using ethyl acetate as eluent. The mixture was refluxed for 1h to reach completion. After complete consumption of the starting material, the solvent was removed and the residue was taken off with ethyl acetate and washed with water and brine, and dried over sodium sulfate. The solvent was removed and the residue was solubilized in DMF (2mL). 3-Phenylpropylamine (130μL;

1.0mmol) and TEA (167 $\mu$ L; 1.2mmol) were added and the mixture was stirred for 3h at room temperature. The mixture was diluted with ethyl acetate and washed with water, brine and dried over sodium sulfate. The solvent was removed and the residue was purified by silica gel flash chromatography using a linear gradient of ethyl acetate (0 $\rightarrow$ 100% EtOAc) in cyclohexane to  
 5 afford **17** as a white powder (232mg; 0.49mmol; yield 81%).

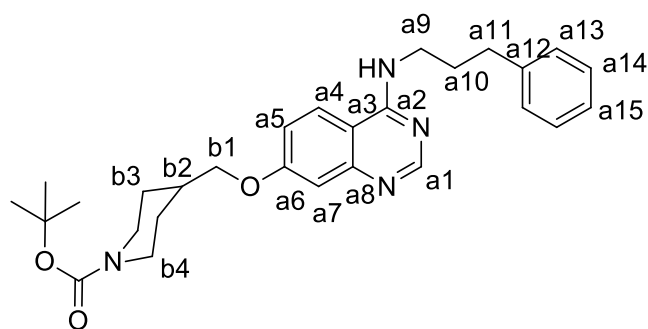

**$^1\text{H}$  NMR (500MHz,  $\text{CDCl}_3$ )**  $\delta$  8.57 (s, 1H, Ha1), 7.33-7.28 (m, 3H, Ha4 and Ha13), 7.25-7.20 (m, 3H, Ha15 and Ha14), 7.12 (d,  $J=2.6\text{Hz}$ , 1H, Ha7), 7.00 (dd,  $J=2.6, 9.5\text{Hz}$ , 1H, Ha5), 5.44 (brt,  $J=5.2$ , 1H, HNH), 4.17 (brs, 2H, Hb4eq), 3.92 (d,  $J=6.3\text{Hz}$ , 2H, Hb1), 3.70 (q,  $J=7.2\text{Hz}$ , 2H, Ha9), 2.79 (t, 2H,  $J=7.3\text{Hz}$ , Ha11), 2.75 (brt,  $J=11.2\text{Hz}$ , 2H, Hb4ax), 2.09 (quint,  $J=7.3\text{Hz}$ , 2H, Ha10), 2.01 (m, 1H, Hb2), 1.83 (d,  $J=12.3\text{Hz}$ , 2H, Hb3eq), 1.47 (s, 9H, HBoc), 1.31 (dq,  $J=4.5\text{-}12.3\text{Hz}$ , 2H, Hb3ax).

**$^{13}\text{C}$  NMR (125MHz,  $\text{CDCl}_3$ )**  $\delta$  162.9 (Ca6), 159.2 (Ca2), 156.1 (Ca1), 155.0 (CBoc), 151.7 (Ca8), 141.7 (Ca12), 128.8 (Ca13), 128.6 (Ca14), 126.3 (Ca15), 122.0 (Ca4), 118.0 (Ca5), 109.1 (Ca3), 108.0 (Ca7), 79.6 (CBoc), 72.6 (Cb1), 43.7 (Cb4), 41.3 (Ca9), 36.1 (Cb2), 33.8 (Ca11), 30.9 (Ca10), 29.0 (Cb3), 28.6 (CBoc).

**HRMS-ESI ( $m/z$ )** calculated for  $\text{C}_{19}\text{H}_{26}\text{N}_3\text{O}_4$  [ $\text{M}+\text{H}$ ] $^+$ : 477.2860; found: 477.2861.



**4-((3-phenylpropyl)amino)-7-O-(piperidin-4-ylmethoxy)quinazoline (18)**

A mixture of **17** (220mg; 0.46mmol) in TFA was stirred for 1h at room temperature. TFA was removed and the residue was diluted with dichloromethane and the organic phase was washed with saturated Na<sub>2</sub>CO<sub>3</sub>. The solvent was removed and **18** was obtained as pale blue foam (165mg; 0.44mmol; yield 96%).

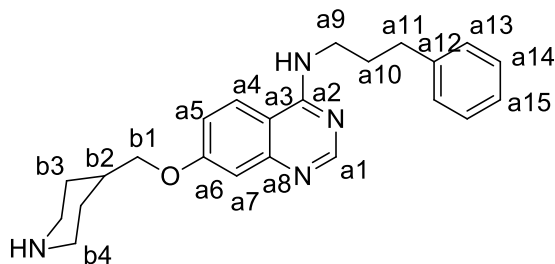

**<sup>1</sup>H NMR (500MHz, DMSO) δ** 9.94 (brs, 1H, HNH), 8.79 (s, 1H, Ha1), 8.4 (d, *J*=9.3Hz, 1H, Ha4), 7.43-7.13 (m, 7H, Ha5, Ha7, Ha13, Ha14 and Ha15), 4.06 (d, *J*=6.2Hz, 2H, Hb1), 3.70 (q, *J*=7.2Hz, 2H, Ha9), 3.34 (brd, *J*=12.6Hz, 2H, Hb4eq), 2.94 (brt, *J*=11.5Hz, 2H, Hb4ax), 2.69 (t, *J*=7.3Hz, 2H, Ha11), 2.15 (m, 1H, Hb2), 2.00 (quint, 2H, *J*=7.3Hz, Ha10), 1.95 (brd, 2H, Hb3eq), 1.53 (dq, *J*=4.0-15.0Hz, 2H, Hb3ax).

**<sup>13</sup>C NMR (125MHz, DMSO) δ** 164.5 (Ca6), 160.8 (Ca2), 152.5 (Ca1), 142.3 (Ca8), 141.7 (Ca12), 129.3 (Ca13), 129.2 (Ca14), 127.2 (Ca4), 126.7 (Ca15), 119.1 (Ca5), 107.9 (Ca3), 102.6 (Ca7), 72.9 (Cb1), 43.6 (Cb4), 42.2 (Ca9), 33.8 (Cb2), 33.4 (Ca11), 30.8 (Ca10), 26.0 (Cb3).

**HRMS-ESI (m/z)** calculated for C<sub>19</sub>H<sub>26</sub>N<sub>3</sub>O<sub>4</sub> [M+H]<sup>+</sup>: 377.2336; found: 377.2303.

**1-(methoxymethyl)-N<sup>4</sup>-(2-(4-(((4-((3-phenylpropyl)amino)quinazolin-7-yl)oxy)methyl)piperidin-1-yl)ethyl)cytosine (19)**

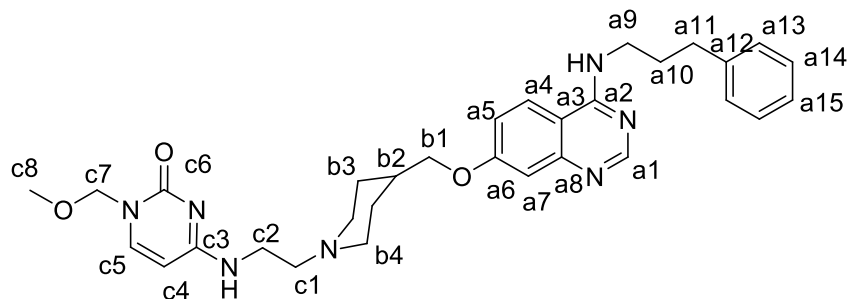

To a solution of **18** (10mg; 27μmol), TEA (30μL; 0.22mmol), in DMF (0.2mL) was added 2-(*N*-Boc-amino)ethylbromide (10mg; 35μmol). The mixture was stirred at room temperature for 2.5h. The mixture was diluted with ethyl acetate. The organic phase was washed with water and brine and dried over sodium sulfate. The solvent was removed and the crude product was immediately solubilized in TFA (0.5mL). The mixture was stirred at room temperature for 0.5h. TFA was removed by vacuum. The residue was solubilized in ammonia 7N in methanol and the solvent was removed to afford crude 4-((3-phenylpropyl)amino)-7-(*O*-((*N*-2-ethylamine)piperidin-4-ylmethoxy))quinazoline that was used without further purification.

To a solution of triazole (28mg; 0.40mmol) and POCl<sub>3</sub> (12μL; 0.132mmol) in 0.3 mL of acetonitrile at 0°C was added TEA 56μL dropwise. The reaction mixture was stirred at 0°C for 40min then 30min at room temperature. **9** (10mg; 60μmol) was added and the mixture was vigorously stirred at room temperature overnight. The solvent was removed and 0.5 mL of a solution of previously prepared 4-((3-phenylpropyl)amino)-7-(*O*-((*N*-2-ethylamine)piperidin-4-ylmethoxy))quinazoline was added to the residue. The reaction mixture was stirred 3h at 35°C. The mixture was diluted with ethyl acetate. The organic phase was washed with water and brine and dried over sodium sulfate. The solvent was removed and the residue was purified by silica gel flash chromatography using a linear gradient of ammonia 1N in methanol (0→10%

MeOH/NH<sub>3</sub>) in dichloromethane or by reversed phase HPLC using a linear acetonitrile gradient with 0.01% of TEA (0→80% CH<sub>3</sub>CN) to afford **19** (3.5mg; 6.3μmol, yield 23%) as a white powder.

**<sup>1</sup>H NMR (500MHz, CDCl<sub>3</sub>) δ** 8.57 (s, 1H, Ha1), 7.34-7.28 (m, 3H, Ha4 and Ha13), 7.28-7.20 (m, 4H, Ha15, Ha14 and Hc5), 7.11 (d, *J*=2.3Hz, 1H, Ha7), 7.00 (dd, *J*=2.3, 8.9Hz, 1H, Ha5), 5.79 (brt, *J*=4.4Hz, 1H, HNHc), 5.67 (d, *J*=7.3Hz, 1H, Hc4), 5.44 (brt, *J*=5.5, 1H, HNH<sub>a</sub>), 5.17 (s, 2H, Hc7), 4.85 (brt, *J*=5.1Hz, 1H, HNHc), 3.92 (d, *J*=5.8Hz, 2H, Hb1), 3.70 (q, *J*=7.0Hz, 2H, Ha9), 3.58 (q, *J*=4.9Hz, 2H, Hc2), 3.39 (s, 3H, Hc8), 2.94 (brd, *J*=10.6Hz, 2H, Hb4eq), 2.79 (t, *J*=7.2Hz, Ha11), 2.55 (t, *J*=5.7Hz, 2H, Hc1), 2.11-2.00 (m, 4H, Ha10 and Hb4ax), 1.95-1.79 (m, 3H, Hb2 and Hb3eq), 1.46-1.35 (m, 2H, Hb3ax).

**<sup>13</sup>C NMR (125MHz, CDCl<sub>3</sub>) δ** 163.6 (Cc3), 162.2 (Ca6), 159.0 (Ca2), 157.0 (Cc6), 156.0 (Ca1), 151.6 (Ca8), 142.7 (Cc5), 141.5 (Ca12), 128.6 (Ca13), 128.4 (Ca14), 126.1 (Ca15), 121.8 (Ca4), 117.9 (Ca5), 109.0 (Ca3), 107.8 (Ca7), 95.8 (Cc4), 78.8 (Cc7), 72.7 (Cb1), 56.7 (Cc8), 56.2 (Cc1), 53.0 (Cb4), 41.1 (Ca9), 37.2 (Cc2), 35.6 (Cb2), 33.7 (Ca11), 30.7 (Ca10), 29.0 (Cb3).

**HRMS-ESI(m/z)** calculated for C<sub>31</sub>H<sub>40</sub>N<sub>7</sub>O<sub>3</sub> [M+H]<sup>+</sup>: 558.3187; found: 558.3182.

**4-((3-phenylpropyl)amino)-7-((1-(2-(quinolin-4-ylamino)ethyl)piperidin-4-yl)methoxy)quinazoline (20)**

To a solution of **18** (30mg; 80μmol), K<sub>2</sub>CO<sub>3</sub> (22mg; 160μmol) and a catalytic amount of KI in DMF (1mL) was added **12** (33mg; 160μmol). The mixture was stirred at 65°C overnight then

was diluted with ethyl acetate. The organic phase was washed with water and brine and dried over sodium sulfate. The solvent was removed and the residue was purified by silica gel flash chromatography using a linear gradient of ammonia 1N in methanol (0→10% MeOH/NH<sub>3</sub>) in dichloromethane or by reversed phase HPLC using a linear acetonitrile gradient with 0.01% of

5 TEA (0→80% CH<sub>3</sub>CN) to afford **20** as a white powder (35mg; 64μmol; 80%).

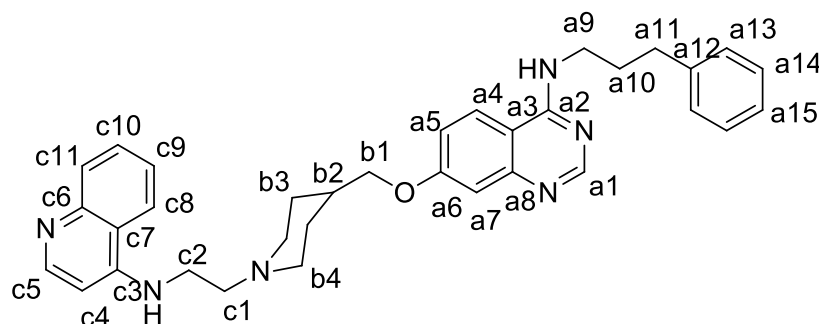

**<sup>1</sup>H NMR (500MHz, CDCl<sub>3</sub>)** δ 8.58 (s, 1H, Ha1), 8.56 (d, *J*=5.4Hz, 1H, Hc5), 7.98 (dd, *J*=0.7, 8.4Hz, 1H, Hc8), 7.76 (dd, *J*=0.7, 8.4Hz, 1H, Hc11), 7.63 (ddd, *J*=1.2, 6.9, 8.2Hz, 1H, Hc10), 7.46 (ddd, *J*=1.2, 6.9, 8.2Hz, 1H, Hc9), 7.34-7.28 (m, 3H, Ha4 and Ha13), 7.25-7.20 (m, 3H, Ha15 and Ha14), 7.13 (d, *J*=2.5Hz, 1H, Ha7), 7.00 (dd, *J*=2.6, 5.1Hz, 1H, 9.1Hz, Ha5), 6.40 (d, *J*=5.1Hz, 1H, Hc4), 5.96 (brt, *J*=4.5Hz, 1H, HNHC), 5.48 (brt, *J*=5.1Hz, 1H, HNHa), 3.96 (d, *J*=6.1Hz, 2H, Hb1), 3.70 (q, *J*=7.2Hz, 2H, Ha9), 3.34 (q, *J*=5.2Hz, 2H, Hc2), 3.00 (brd, *J*=12.0Hz, 2H, Hb4eq), 2.75 (m, 4H, Ha11 and Hc1), 2.14 (dt, *J*=2.1Hz, 2H, Hb4ax), 2.09 (quint, *J*=7.2Hz, 2H, Ha10), 1.94 (m, 1H, Hb2), 1.91 (d, *J*=12.3Hz, 2H, Hb3eq), 1.47 (dq, *J*=3.4, 12.5Hz, 2H, Hb3ax).

**<sup>13</sup>C NMR (125MHz, CDCl<sub>3</sub>)** δ 161.6 (Ca6), 158.4 (Ca2), 155.3 (Ca1), 151.0 (Ca8), 150.5 (Cc5), 149.1 (Cc3), 147.8 (Cc6), 140.9 (Ca12), 129.3 (Cc8), 128.3 (Cc10), 128.0 (Ca13), 127.8 (Ca14), 125.5 (Ca15), 124.0 (Cc9), 121.2 (Ca4), 118.8 (Cc11), 118.3 (Cc7), 117.2 (Ca5), 108.3

(Ca3), 107.2 (Ca7), 98.4 (Cc4), 72.0 (Cb1), 55.3(Cc1), 52.3 (Cb4), 40.5 (Ca9), 38.6 (Cc2), 35.0 (Cb2), 33.0 (Ca11), 30.1 (Ca10), 28.6 (Cb3).

**HRMS-ESI (m/z)** calculated for C<sub>19</sub>H<sub>26</sub>N<sub>3</sub>O<sub>4</sub> [M+H]<sup>+</sup> : 547.3180; found: 547.3171.

5 **4-(3-phenylpropylamino)-7-((1-(quinolin-4-yl)piperidin-4-yl)methoxy)quinazoline (21)**

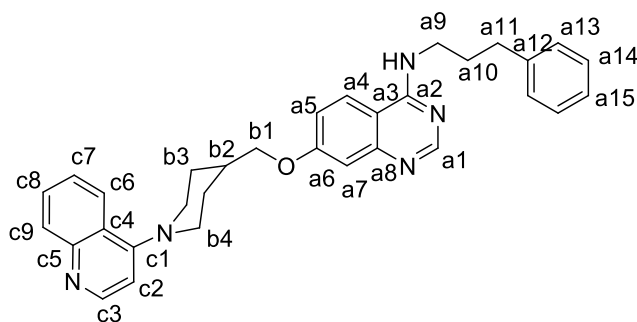

To a solution of **18** (20mg; 53μmol), K<sub>2</sub>CO<sub>3</sub> (15mg; 106μmol) in DMF (1.5mL) was added **4-chloroquinoline** (17mg; 106μmol). The mixture was stirred at 90°C overnight. **4-chloroquinoline** (40mg; 244μmol) was added and the mixture was stirred at 120°C for 7h. The solvent was removed and the residue was purified by reversed phase HPLC using a linear acetonitrile gradient with 0.01% of TEA (0→80% CH<sub>3</sub>CN) to afford **21** as a white powder (3.0mg; 6μmol; yield 12%).

**<sup>1</sup>H NMR (500MHz, CDCl<sub>3</sub>) δ** 8.75 (d, *J*=5.2Hz, 1H, Hc3), 8.61 (s, 1H, Ha1), 8.07 (dd, *J*=0.7, 8.4Hz, 1H, Hc6), 8.05 (dd, *J*=0.7, 8.4Hz, 1H, Hc9), 7.68 (ddd, *J*=1.3, 7.0, 8.1Hz, 1H, Hc8), 7.51 (ddd, *J*=1.3, 7.0, 8.1Hz, 1H, Hc7), 7.38-7.31 (m, 3H, Ha4 and Ha13), 7.28-7.23 (m, 3H, Ha15 and Ha14), 7.20 (d, *J*=2.4Hz, 1H, Ha7), 7.08 (dd, *J*=2.5, 1H, 8.8Hz, Ha5), 6.90 (d, *J*=5.1Hz, 1H, Hc2), 5.48 (brt, *J*=5.6Hz, 1H, HNHa), 4.09 (d, *J*=6.1Hz, 2H, Hb1), 3.77-3.68 (m,

4H, Ha9 and Hb4eq), 2.91 (dt,  $J=1.9, 12.1\text{Hz}$ , 2H, Hb4ax), 2.82 (t,  $J=7.4\text{Hz}$ , 2H, Ha11), 2.17-2.06 (m, 5H, Ha10, Hb2 and Hb3eq), 1.82 (dq,  $J=3.5, 12.4\text{Hz}$ , 2H, Hb3ax).

**$^{13}\text{C}$  NMR (125MHz,  $\text{CDCl}_3$ )  $\delta$**  162.2 (Ca6), 159.0 (Ca2), 157.5 (Cc1), 156.0 (Ca1), 151.6 (Ca8), 150.8 (Cc3), 149.6 (Cc5), 141.5 (Ca12), 129.9 (Cc6), 129.0 (Cc8), 128.7 (Ca13), 128.4 (Ca14), 126.1 (Ca15), 125.3 (Cc7), 123.7 (Cc9), 123.6 (Cc4), 121.9 (Ca4), 117.9 (Ca5), 109.1 (Ca3), 108.8 (Cc2), 107.9 (Ca7), 72.5 (Cb1), 52.5 (Cb4), 41.2 (Ca9), 35.9 (Cb2), 33.7 (Ca11), 30.7 (Ca10), 29.1 (Cb3).

**HRMS-ESI(m/z)** calculated for  $\text{C}_{32}\text{H}_{34}\text{N}_5\text{O}$   $[\text{M}+\text{H}]^+$ : 504.2758; Found: 504.2758.

**Compound 22** was synthesized following the same procedure as for **Compound 20**.

#### **7-(*O*-((*N*-Boc)pyrrolin-3-ylmethoxy))quinazolin-4-one (22A)**

**22A** was synthesized from 50mg of **15** (0.30mmol) and 41 mg *N*-Boc-3-(hydroxymethyl)pyrrolidine *N*-Bocpyrrolidine methanol (0.20mmol). **22A** was obtained as a white powder (40mg; 0.11mmol; yield 57%).

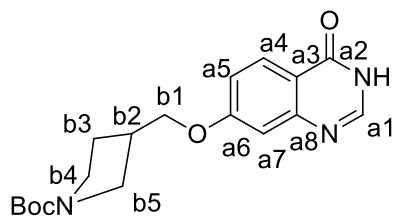

**$^1\text{H}$  NMR (500MHz, DMSO)  $\delta$**  11.38 (s, 1H, HNH), 8.14 (d, 1H,  $J=9.0$ , Ha4), 7.68 (s, 1H, Ha1), 7.14-7.08 (m, 2H, Ha7 and Ha5), 4.11-4.05 (m, 2H, Hb1), 3.47-3.40 (m, 1H, Hb5),

3.42-3.22 (m, 2H, Hb4), 3.15-3.07 (m, 1H, Hb5), 2.70-2.61 (m, 2H, Ha11 and Hb2), 1.78-1.71 (m, 2H, Hb3), 1.45 (s, 9H, HBoc).

<sup>13</sup>C NMR (125MHz, DMSO) δ 164.0 (Ca6), 162.1 (Ca2), 155.0 (CBoc), 151.2 (Ca8), 143.9 (Ca1), 128.1 (Ca4), 118.0 (Ca5), 116.1 (Ca3), 109.2 (Ca7), 78.5 and 78.3 (Cb1), 64.0 (CBoc), 49.1 and 48.7 (Cb5), 45.6 and 45.4 (Cb4), 38.4 and 37.4 (Cb2), 28.6 (CBoc), 28.4 and 27.4 (Cb3).

MS-ESI (m/z) calculated for C<sub>18</sub>H<sub>24</sub>N<sub>3</sub>O<sub>4</sub> [M+H]<sup>+</sup>: 346.17; found: 346.19.

#### 10 4-((3-phenylpropyl)amino)-7-(O-((N-Boc)pyrrolidin-4-ylmethoxy))quinazoline (22B)

22B was synthesized from 22A was synthesized following the same procedure as for Compound 19.

From 40mg of 22A (111μmol). 22B was obtained as a white powder (39mg; 90μmol; yield 77%).

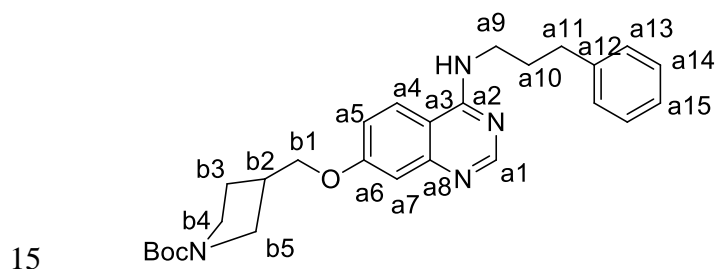

<sup>1</sup>H NMR (500 MHz, DMSO) δ 8.39 (s, 1H, Ha1), 8.17 (d, *J*=9.1Hz, 1H, Ha4), 8.13 (brt, *J*=5.1 Hz, 1H, HNH), 7.32-7.22 (m, 4H, Ha13 and Ha14), 7.20-7.16 (m, 1H, Ha15), 7.11 (dd, *J*=2.4, 8.7Hz, 1H, Ha5), 7.08 (d, *J*=2.5Hz, 1H, Ha7), 4.16- 4.05 (m, 2H, Hb1), 3.57-3.48 (m, 3H, Ha9 and Hb5), 3.44-3.24 (m, 2H, Hb4), 3.17-3.09 (m, 1H, Hb5), 2.75-2.60 (m, 3H, Ha11

and Hb2), 2.11-2.01 (m, 1H, Hb3), 1.96 (quint,  $J=7.3\text{Hz}$ , 2H, Ha10), 1.80-1.69 (m, 1H, Hb3), 1.41 (s, 9H, HBoc).

**$^{13}\text{C}$  NMR (125MHz, DMSO)  $\delta$**  162.0 (Ca6), 159.5 (Ca2), 156.0 (Ca1), 154.0 (CBoc), 151.5 (Ca8), 142.2 (Ca12), 128.8 (Ca14), 128.7 (Ca13), 126.2 (Ca15), 124.8 (Ca4), 117.1 (Ca5), 109.6 (Ca3), 107.9 (Ca7), 78.6 and 78.4 (Cb1), 62.9 (CBoc), 49.0 and 48.7 (Cb5), 45.6 and 45.4 (Cb4), 40.5 (Ca9), 38.3 and 37.4 (Cb2), 33.1 (Ca11), 30.8 (Ca10), 28.6 (CBoc), 28.4 and 27.4 (Cb3).

**HRMS-ESI ( $m/z$ )** calculated for  $\text{C}_{27}\text{H}_{35}\text{N}_4\text{O}_3$   $[\text{M}+\text{H}]^+$ : 463.2704  $[\text{M}+\text{H}]^+$ ; found: 463.2659.

#### 10 **4-((3-phenylpropyl)amino)-7-*O*-(pyrrolidin-3-ylmethoxy)quinazoline (22C)**

A mixture of **22B** (100mg; 216 $\mu\text{mol}$ ) in TFA was stirred for 1h at room temperature. TFA was removed. The residue was diluted with dichloromethane and the organic phase was washed with saturated  $\text{Na}_2\text{CO}_3$ . The solvent was removed and **22C** was obtained as pale blue foam (60mg; 166 $\mu\text{mol}$ ; yield 76%).

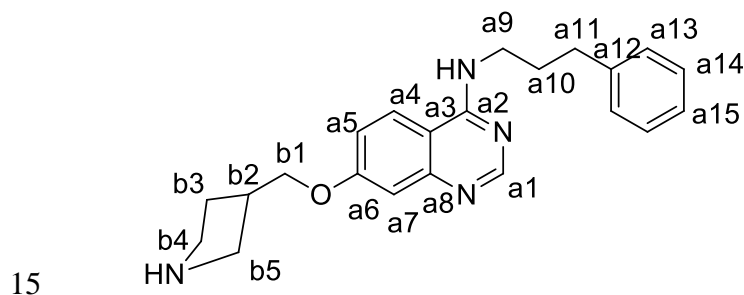

**$^1\text{H}$  NMR (500 MHz ; DMSO)  $\delta$**  8.38 (s, 1H, Ha1), 8.15 (d,  $J=9.5\text{Hz}$ , 1H, Ha4), 8.09 (brt,  $J=5.7\text{ Hz}$ , 1H, HNH), 7.32-7.22 (m, 4H, Ha13 and Ha14), 7.18 (m, 1H, Ha15), 7.11 (dd,  $J=2.9,9.5\text{Hz}$ , 1H, Ha5), 7.07 (d,  $J=2.1\text{Hz}$ , 1H, Ha7), 4.03- 3.97 (m, 2H, Hb1), 3.56-3.49 (m, 2H, Ha9), 2.93-2.79 (m, 2H, Hb5 and Hb4), 2.76-2.60 (m, 4H, Hb5, Hb4 and Ha11), 2.49-2.41



(m, 1H, Hb2), 1.94 (quint,  $J=7.0\text{Hz}$ , 2H, Ha10), 1.90-1.80 (m, 1H, Hb3), 1.50-1.39 (m, 1H, Hb3).

**$^{13}\text{C}$  NMR (125MHz; DMSO)  $\delta$**  162.2 (Ca6), 159.5 (Ca2), 156.1 (Ca1), 151.7 (Ca8), 142.2 (Ca12), 128.8 (Ca14), 128.7 (Ca13), 126.2 (Ca15), 124.7 (Ca4), 117.2 (Ca5), 109.5 (Ca3),  
5 107.9 (Ca7), 71.2 (Cb1), 50.4 (Cb5), 46.7 (Cb4), 40.5 (Ca9), 38.7 (Cb2), 33.2 (Ca11), 31.7 (Ca10), 29.4 (Cb3).

**HRMS-ESI ( $m/z$ )** calculated for  $\text{C}_{22}\text{H}_{27}\text{N}_4\text{O}_1$   $[\text{M}+\text{H}]^+$ : 363.2180  $[\text{M}+\text{H}]^+$ ; found: 363.2195.

**4-((3-phenylpropyl)amino)-7-((1-(2-(quinolin-4-ylamino)ethyl)pyrrolidin-3-yl)**

10 **methoxy)quinazoline (22)**

To a solution of **22C** (15mg;  $41\mu\text{mol}$ ),  $\text{K}_2\text{CO}_3$  (11mg;  $80\mu\text{mol}$ ) and a catalytic amount of KI in DMF (0.5mL) was added **12** (16mg;  $80\mu\text{mol}$ ). The mixture was stirred at  $65^\circ\text{C}$  overnight then was diluted with ethyl acetate. The organic phase was washed with water and brine and dried over sodium sulfate. The solvent was removed and the residue was purified by silica gel  
15 flash chromatography using a linear gradient of ammonia 1N in methanol (0 $\rightarrow$ 10% MeOH/ $\text{NH}_3$ ) in dichloromethane or by reversed phase HPLC using a linear acetonitrile gradient with 0.01% of TEA (0 $\rightarrow$ 80%  $\text{CH}_3\text{CN}$ ) to afford Compound **22** as a white powder (7mg;  $13\mu\text{mol}$ ; yield 31%).

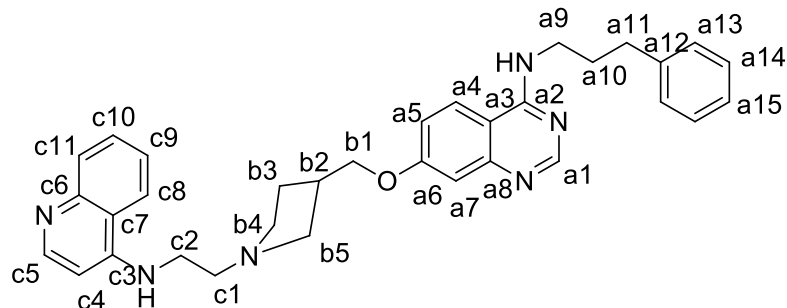

**<sup>1</sup>H NMR (500 MHz, DMSO) δ** 8.38 (s, 1H, Ha1), 8.37 (d, *J*= 5.3Hz, 1H, Hc5), 8.16 (d, *J*=7.8Hz, 1H, Hc8), 8.15 (d, *J*=9.2Hz, 1H, Ha4), 8.11 (brt, *J*=5.9 Hz, 1H, HNH), 7.77 (dd, *J*=1.0, 8.2 Hz, 1H, Hc11), 7.59 (ddd, *J*=1.0, 6.8, 8.2Hz, 1H, Hc10), 7.41 (ddd, *J*=1.0, 6.8, 8.1Hz, 1H, Hc9), 7.32-7.22 (m, 4H, Ha13 and Ha14), 7.18 (m, 1H, Ha15), 7.13-7.05 (m, 3H, Ha5, Hc4 and Ha7), 6.47 (d, *J*=5.4Hz, 1H), 4.06- 3.97 (m, 2H, Hb1), 3.46-3.39 (m, 2H, Hc2), 2.93 (q, *J*=6.1Hz, 2H, Ha9), 2.82-2.72 (m, 3H, Hc1 and Hb5), 2.72-2.57 (m, 6H, Hb4, Ha10, Hb2 and Ha11), 2.53-2.43 (m, 1H, Hb5), 1.99-1.86 (m, 1H, Hb3), 1.31-1.24 (m, 1H, Hb3).

**<sup>13</sup>C NMR (125MHz, DMSO) δ** 162.0 (Ca6), 159.5 (Ca2), 156.1 (Ca1), 151.7 (Ca8), 151.1 (Cc5), 150.2 (Cc3), 148.7 (Cc6), 142.2(Ca12), 129.5 (Cc11), 129.1 (Cc10), 128.8 (Ca14), 128.7 (Ca13), 126.2 (Ca15), 124.7 (Ca4), 124.3 (Cc9), 121.9 (Cc8), 119.2 (Cc7), 117.1 (Ca5), 109.6 (Ca3), 108.0 (Ca7), 98.67 (Cc4), 71.6 (Cb1), 57.7 (Cc1), 53.8 (Cb4), 41.9 (Cc2), 40.4 (Ca9), 35.9 (Cb2), 33.7 (Ca11), 31.7 (Ca10), 30.8 (Cb3).

**HRMS-ESI (m/z)** calculated for C<sub>33</sub>H<sub>37</sub>N<sub>6</sub>O<sub>1</sub> [M+H]<sup>+</sup>: 533.3024 [M+H]<sup>+</sup>; found: 533.3025.

15

#### **7-(O-2-((4-((N-Boc)piperazin-1-yl)ethoxy)))quinazolin-4-one (23A)**

To a mixture of **1-(N-Boc)-4-(2-hydroxyethyl)piperazine** (351mg; 1.5mmol) in DMF (6mL) at 0°C under argon was added sodium hydride (183mg; 7.6mmol). The mixture was

stirred for 15min at 0°C then **15** (500mg; 3mmol) was added portion wise. The mixture was stirred at 110°C for 4h. The reaction mixture was diluted with ethyl acetate and washed with water and brine. The organic phase was dried over magnesium sulfate and the solvent was removed. The crude product was purified by silica gel flash chromatography using a linear  
 5 gradient of ethyl acetate (0→100% EtOAc) in cyclohexane to afford **23A** as a white powder (342mg; 91μmol; yield 61%).

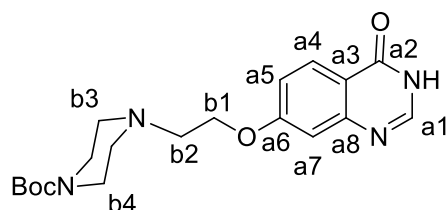

10 **<sup>1</sup>H NMR (500MHz, DMSO) δ** 12.10 (brs, 1H, HNH), 8.06 (s, 1H, Ha1), 8.01 (d, *J*=8.5Hz, 1H, Ha4), 7.13-7.09 (m, 2H, Ha5 and Ha7), 4.24 (t, *J*=5.6Hz, 2H, Hb1), 3.33 (m, 4H, Hb4), 2.76 (t, *J*=5.6Hz, 2H, Hb2), 2.45 (t, *J*=4.9Hz, 4H, Hb3), 1.40 (s, 9H, HBoc).

**<sup>13</sup>C NMR (125MHz, DMSO) δ** 163.5 (Ca6), 160.7 (Ca2), 154.2 (CBoc), 151.4 (Ca8), 146.4 (Ca1), 127.9 (Ca4), 117.0 (Ca5), 116.4 (Ca3), 109.5 (Ca7), 79.2 (CBoc), 66.3 (Cb1), 56.8  
 15 (Cb2), 53.2 (Cb3), 44.1 and 43.1 (Cb4), 28.5 (CBoc).

**HRMS-ESI (m/z)** calculated for C<sub>19</sub>H<sub>27</sub>N<sub>4</sub>O<sub>4</sub> [M+H]<sup>+</sup>: 375.2027 [M+H]<sup>+</sup>; found: 375.2029.

**4-((3-phenylpropyl)amino)-7-(O-2-(4-((N-Boc)piperazin-1-yl)ethoxy))quinazoline (23)**

To a solution of triazole (113mg; 1.6mmol) and POCl<sub>3</sub> (48μl; 0.53mmol) in 2 mL of acetonitrile at 0°C was added TEA (228μL) dropwise. The reaction mixture was stirred at 0°C for 40min then 30min at room temperature. **23A** (90mg; 0.24mmol) was added and the mixture was vigorously stirred at room temperature overnight. The solvent was removed and the residue was taken off with ethyl acetate and washed with water and brine, and dried over sodium sulfate. The solvent was removed and the residue was purified by silica gel flash chromatography using a linear gradient of methanol (0→10% MeOH) in dichloromethane to afford the triazolyle derivative of **23B** as a white solid (102mg; 94μmol; yield 39%).

**MS-ESI (m/z)** calculated for C<sub>21</sub>H<sub>28</sub>N<sub>7</sub>O<sub>3</sub> [M+H]<sup>+</sup>: 426.22 [M+H]<sup>+</sup>; found: 426.24.

To a solution of the triazolyle derivative of **23B** (40mg; 94μmol), and TEA (26μL; 188μmol) in DMF (0.5mL) was added 3-phenylpropylamine (25mg; 188μmol) and the mixture was stirred overnight at room temperature. The mixture was diluted with ethyl acetate and washed with water, brine and dried over sodium sulfate. The solvent was removed and the residue was purified by reversed phase HPLC using a linear acetonitrile gradient with 0.01% of TEA (0→80% CH<sub>3</sub>CN) to afford **23** (25mg, 50μmol, yield 53%) as a white powder.

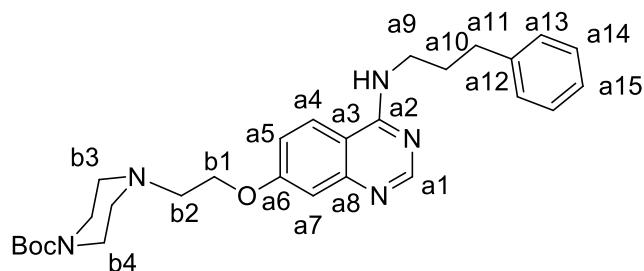

**<sup>1</sup>H NMR (500MHz, DMSO)** δ 8.40 (s, 1H, Ha1), 8.13 (d, *J*=9.1Hz, 1H, Ha4), 8.09 (brt, *J*=5.5Hz, 1H, HNH<sub>a</sub>), 7.34-7.24 (m, 4H, Ha13 and Ha14), 7.20-7.16 (m, 1H, Ha15), 7.13 (dd,

$J=2.5$ , 9.1Hz, 1H, Ha5), 7.09 (d,  $J=2.5$ Hz, 1H, Ha7), 4.24 (t,  $J=5.5$ Hz, 2H, Hb1), 3.51 (q,  $J=6.8$ Hz, 2H, Ha9), 3.33 (m, 4H, Hb4), 2.80 (t,  $J=5.6$ Hz, 2H, Hb2), 2.68 (t,  $J=7.6$ Hz, 2H, Ha11), 2.45 (t,  $J=4.9$ Hz, 4H, Hb3), 1.96 (quint,  $J=7.6$ Hz, 2H, Ha10) 1.41 (s, 9H, HBoc).

**$^{13}\text{C}$  NMR (125MHz, DMSO)  $\delta$**  165.6 (Ca6), 161.8 (Ca2), 156.2 (Ca1), 154.0 (CBoc),  
 5 151.8 (Ca8), 142.2 (Ca12), 128.8 (Ca14), 128.7 (Ca13), 126.2 (Ca15), 124.7 (Ca4), 117.2 (Ca5), 109.6 (Ca3), 108.0 (Ca7), 79.1 (CBoc), 66.1 (Cb1), 56.8 (Cb2), 54.0 (Cb3), 52.8 (Cb3), 45.2 (Cb4), 40.5 (Ca9), 39.7 (Cb4), 33.2 (Ca11), 30.8 (Ca10), 28.7 (CBoc).

**HRMS-ESI ( $m/z$ )** calculated for  $\text{C}_{28}\text{H}_{38}\text{N}_5\text{O}_3$   $[\text{M}+\text{H}]^+$ : 492.2969  $[\text{M}+\text{H}]^+$ ; found: 492.2970.

10

#### 4-((3-phenylpropyl)amino)-7-(*O*-2-(piperazin-1-yl)ethoxy))quinazoline (**24**)

A mixture of **23** (30mg; 61 $\mu\text{mol}$ ) in TFA was stirred for 1h at room temperature. TFA was removed. The residue was diluted with dichloromethane and the organic phase was washed with saturated  $\text{Na}_2\text{CO}_3$ . The solvent was removed and the residue was purified by silica gel  
 15 flash chromatography using a linear gradient of ammonia methanol 7N (0 $\rightarrow$ 10% MeOH/ $\text{NH}_3$ ) in dichloromethane to afford **24** as a white solid (22mg; 56 $\mu\text{mol}$ ; yield 92%).

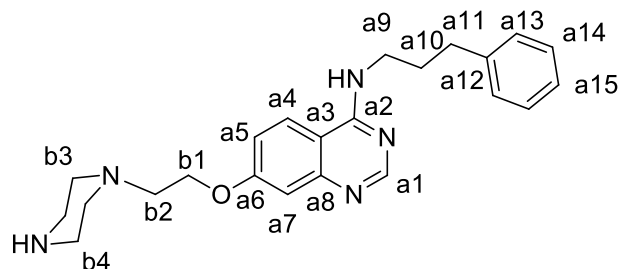

**<sup>1</sup>H NMR (500MHz, DMSO) δ** 8.38 (s, 1H, Ha1), 8.14 (d, *J*=9.2Hz, 1H, Ha4), 8.10 (brt, *J*=5.5Hz, 1H, HNHa), 7.33-7.23 (m, 4H, Ha13 and Ha14), 7.22-7.16 (m, 1H, Ha15), 7.11 (dd, *J*=2.6, 9.1Hz, 1H, Ha5), 7.09 (d, *J*=2.6Hz, 1H, Ha7), 4.24 (t, *J*=5.5Hz, 2H, Hb1), 3.51 (q, *J*=6.8Hz, 2H, Ha9), 3.41-3.36 (m, 4H, Hb4), 2.80 (t, *J*=5.5Hz, 2H, Hb2), 2.68 (t, *J*=7.7Hz, 2H, Ha11), 2.52 (m, 2H, Hb3), 2.47 (m, 2H, Hb3), 1.95 (quint, *J*=7.5Hz, 2H, Ha10).

**<sup>13</sup>C NMR (125MHz, DMSO) δ** 165.6 (Ca6), 161.8 (Ca2), 156.2 (Ca1), 151.8 (Ca8), 142.2 (Ca12), 128.8 (Ca14), 128.7 (Ca13), 126.2 (Ca15), 124.7 (Ca4), 117.2 (Ca5), 109.6 (Ca3), 108.0 (Ca7), 66.1 (Cb1), 56.8 (Cb2), 54.0 (Cb3), 52.8 (Cb3), 45.2 (Cb4), 40.5 (Ca9), 39.7 (Cb4), 33.2 (Ca11), 30.8 (Ca10).

**HRMS-ESI (m/z)** calculated for C<sub>23</sub>H<sub>30</sub>N<sub>5</sub>O<sub>1</sub> [M+H]<sup>+</sup>: 492.2970; found: 492.2969.

**N-4-(3-phenylpropylamino)-7-(2-(4-(2-(quinolin-4-ylamino)ethyl)piperazin-1-yl)ethoxy)quinazoline (25)**

To a solution **24** (24mg; 61μmol), K<sub>2</sub>CO<sub>3</sub> (17mg; 123μmol) and a catalytic amount of KI in DMF (0.3mL) was added **12** (30mg; 123μmol). The mixture was stirred at 65°C overnight. The mixture was diluted with ethyl acetate. The organic phase was washed with water and brine and dried over sodium sulfate. The solvent was removed and the residue was purified by silica gel flash chromatography using a linear gradient of ammonia 1N in methanol (0→10% MeOH/NH<sub>3</sub>) in dichloromethane or by reversed phase HPLC using a linear acetonitrile gradient with 0.01% of TEA (0→80% CH<sub>3</sub>CN) to afford **25** (5mg; 8.9μmol; yield 15%) as a white powder.

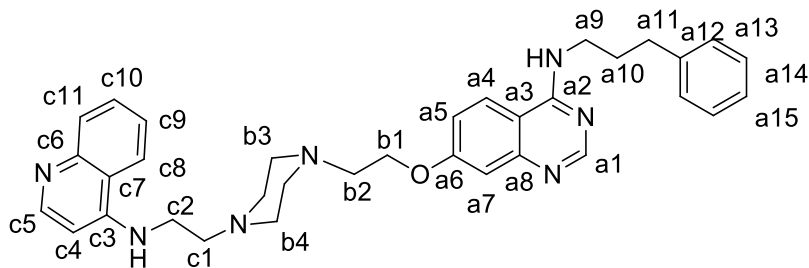

**<sup>1</sup>H NMR (500MHz, DMSO) δ** 8.38 (d, *J*=5.3Hz, 1H, Hc5), 8.37 (s, 1H, Ha1), 8.14 (m, 2H, Ha4, Hc8), 8.08 (brt, *J*=5.1Hz, 1H, HNHa), 7.77 (dd, *J*=1.1, 8.4Hz, 1H, Hc11), 7.59 (ddd, *J*=1.1, 6.8, 8.1Hz, 1H, Hc10), 7.41 (ddd, *J*=1.2, 6.9, 8.2Hz, 1H, Hc9), 7.29-7.23 (m, 4H, Ha13, Ha14), 7.18 (m, 1H, Ha15), 7.10 (dd, *J*=2.5, 9.0Hz, 1H, Ha5), 7.07 (d, *J*=2.6Hz, 1H, Ha7), 7.01(brt, *J*=5.3Hz, 1H, HNHa), 6.46 (d, *J*=5.4Hz, 1H, Hc4), 4.20 (t, *J*=5.7Hz, 2H, Hb1), 3.51 (q, *J*=6.7Hz, 2H, Ha9), 3.34 (q, *J*=6.4Hz, 2H, Hc2), 2.74 (t, *J*=5.6Hz, 2H, Hb2), 2.67 (m, 2H, Ha11), 2.61 (t, *J*=7.0Hz, 2H, Hc1), 2.52 (m, 2H, Hb3), 2.45 (m, 2H, Hb4), 1.94 (quint, *J*=7.6Hz, 2H, Ha10).

10

**<sup>13</sup>C NMR (125MHz, DMSO) δ** 161.5 (Ca6), 159.1 (Ca2), 155.7 (Ca1), 151.3 (Ca8), 150.7 (Cc5), 149.8 (Cc3), 148.3 (Cc6), 141.8 (Ca12), 129.1 (Cc11), 128.7 (Cc10), 128.3 (Ca13, Ca14), 125.7 (Ca15), 124.3 (Ca4), 123.9 (Cc9), 121.4 (Cc9), 118.8 (Cc8), 118.8 (Cc7), 116.8 (Ca5), 109.2 (Ca3), 107.6 (Ca7), 98.3 (Cc4), 65.8 (Cb1), 57.3 (Cb2), 56.5 (Cc1), 53.2 (Cb3), 52.8 (Cb4), 40.1 (Ca9 and Cc2), 32.7 (Ca11), 30.4 (Ca10).

15

**HRMS-ESI (m/z)** calculated for C<sub>34</sub>H<sub>40</sub>N<sub>7</sub>O<sub>1</sub> [M+H]<sup>+</sup>: 562.3289; found: 562.3293.

**3-(3-phenylpropylamino)-7-(O-((N-Boc)piperidin-4-ylmethoxy))quinazoline (26)**

To a solution of **16** (150mg; 42μmol), K<sub>2</sub>CO<sub>3</sub> (115mg; 84μmol) in DMF (1.5mL) was added 1-chloro-3-phenylpropane (129mg; 84μmol). The mixture was stirred at 65°C overnight then was diluted with ethyl acetate. The organic phase was washed with water and brine and dried over sodium sulfate. The solvent was removed to afford **26** as a white powder (190mg; 40μmol; yield 95%).

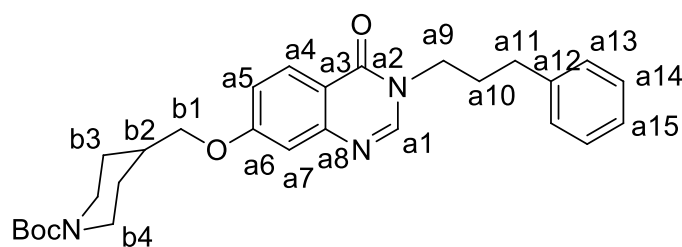

**<sup>1</sup>H NMR (500MHz, DMSO) δ** 8.31 (s, 1H, Ha1), 8.05 (d, *J*=8.4Hz, 1H, Ha4), 7.31-7.25 (m, 2H Ha13), 7.25-7.20 (m, 2H, Ha14), 7.17 (m, 1H, Ha15), 7.14-7.08 (m, 2H, Ha7 and Ha5), 4.08-3.92 (m, 5H, HNH and Hb1 and Ha9), 2.78 (m, 2H, Hb4ax), 2.74 (t, *J*=8.5Hz, 2H, Ha11), 2.07-1.95 (m, 3H, Hb2 and Ha10), 2.10-2.00 (brd, *J*=11Hz, 2H, Hb3eq), 1.40 (s, 9H, HBoc), 1.26-1.13 (m, 2H, Hb3ax).

**<sup>13</sup>C NMR (125MHz, DMSO) δ** 163.7 (Ca6), 160.2 (Ca2), 154.3 (CBoc), 150.6 (Ca8), 149.0 (Ca1), 1421.4 (CBoc), 128.8 (Ca13), 128.6 (Ca14), 128.1 (Ca4), 126.3 (Ca15), 117.2 (Ca5), 115.4 (Ca3), 109.2 (Ca7), 78.9 (CBoc), 72.6 (Cb1), 46.1 (Ca9), 45.1 (Cb4), 35.6 (Cb2), 32.6 (Ca11), 30.7 (Ca10), 28.6 (Cb3), 28.5 5 (CBoc).

**HRMS-ESI (m/z)** calculated for C<sub>28</sub>H<sub>35</sub>N<sub>3</sub>NaO<sub>4</sub> [M+Na]<sup>+</sup>: 500.2520; Found: 500.2516.

**3-(3-phenylpropyl)-7-(piperidin-4-ylmethoxy)quinazolinone (27)**



A mixture of **26** (190mg; 40 $\mu$ mol) in TFA was stirred for 1.5h at room temperature. TFA was removed. The solvent was removed and the residue was purified by reversed phase HPLC using a linear acetonitrile gradient with 0.01% of TEA (0 $\rightarrow$ 80% CH<sub>3</sub>CN) to afford **27** as a white powder (124mg; 33 $\mu$ mol; yield 83%).

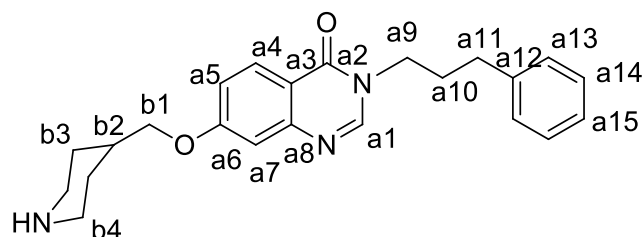

5

**<sup>1</sup>H NMR (500MHz, CCl<sub>3</sub>)**  $\delta$  8.21 (d,  $J$ =8.4Hz, 1H, Ha4), 7.93 (s, 1H, Ha1), 7.31-7.28 (m, 2H Ha13), 7.26-7.18 (m, 3H, Ha15 and Ha14), 7.08-7.00 (m, 2H, Ha7 and Ha5), 4.03-3.90 (m, 5H, HNH and Hb1 and Ha9), 3.56 (brd,  $J$ =9.6Hz, 2H, Hb4eq), 2.96 (m, 2H, Hb4ax), 2.74 (t,  $J$ =7.5Hz, 2H, Ha11), 2.22-2.10 (m, 3H, Hb2 and Ha10), 2.10-2.00 (m, 2H, Hb3eq), 1.95-1.72 (m, 2H, Hb3ax).

10

**<sup>13</sup>C NMR (125MHz, CCl<sub>3</sub>)**  $\delta$  163.2 (Ca6), 160.6 (Ca2), 150.2 (Ca8), 147.3 (Ca1), 128.6 (Ca13), 128.4 (Ca4), 128.3 (Ca14), 126.2 (Ca15), 117.2 (Ca5), 115.9 (Ca3), 108.7 (Ca7), 71.6 (Cb1), 46.5 (Ca9), 43.6 (Cb4), 34.1 (Cb2), 32.7 (Ca11), 30.5 (Ca10), 25.6 (Cb3).

**HRMS-ESI (m/z)** calculated for C<sub>23</sub>H<sub>28</sub>N<sub>3</sub>O<sub>2</sub> [M+H]<sup>+</sup>: 378.2176; Found: 378.2173.

15

**3-(3-phenylpropyl)-7-((1-(2-(quinolin-4-ylamino)ethyl)piperidin-4-yl)**

**methoxy)quinazolinone (28)**

To a solution of **27** (124mg; 0.33mmol), K<sub>2</sub>CO<sub>3</sub> (91mg; 0.66mmol) and a catalytic amount of KI in DMF (1.5mL) was added **12** (80mg; 0.33mmol). The mixture was stirred at 65°C  
5 overnight. The solvent was removed and the residue was purified by reversed phase HPLC using a linear acetonitrile gradient with 0.01% of TEA (0→80% CH<sub>3</sub>CN) to afford **28** as a white powder (50mg; 91μmol, yield 28%).

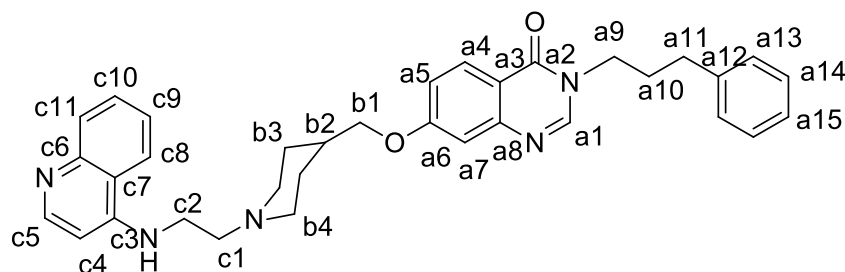

**<sup>1</sup>H NMR (500MHz, DMSO) δ** 8.40 (d, *J*=5.5Hz, 1H, Hc5), 8.35 (s, 1H, Ha1), 8.16 (d,  
10 8.4Hz, 1H, Hc8), 8.05 (d, *J*=8.4Hz, 1H, Ha4), 7.79 (dd, *J*=0.7, 8.5Hz, 1H, Hc11), 7.61 (ddd,  
*J*=1.2, 6.8, 8.2Hz, 1H, Hc10), 7.43 (ddd, *J*=1.2, 6.9, 8.2Hz, 1H, Hc9), 7.31-7.25 (m, 2H,  
Ha13), 7.25-7.20 (m, 3H, Ha15 and Ha14), 7.14-7.08 (m, 2H, Ha7 and Ha5), 7.04 (brt,  
*J*=4.9Hz, 1H, HNH), 6.47 (d, *J*=5.4Hz, 1H, Hc4), 4.03-3.95 (m, 5H, HNH and Hb1 and Ha9),  
3.40 (m, 2H, Hc2), 3.00 (brd, *J*=11.0Hz, 2H, Hb4eq), 2.68-2.60 (m, 4H, Ha11 and Hc1), 2.10-  
15 1.96 (m, 4H, Hb4ax and Ha10), 1.85-1.72 (m, 3H, Hb2 and Hb3eq), 1.37 (dq, *J*=2.6, 11.5Hz,  
2H, Hb3ax).

**<sup>13</sup>C NMR (125MHz, DMSO) δ** 163.7 (Ca6), 160.2 (Ca2), 151.2 (Cc5), 150.7 (Ca8), 150.2  
(Cc3 ), 149.0 (Ca1), 148.8 (Cc6), 141.5 (Ca12), 129.5 (Cc11), 129.1 (Cc10), 128.7 (Ca13),

128.6 (Ca14), 128.1 (Ca4), 126.3 (Ca15), 124.3 (Cc9), 121.8 (Cc8), 119.2 (Cc7), 117.2 (Ca5), 115.4 (Ca3), 109.2 (Ca7), 98.7 (Cc4), 72.9 (Cb1), 56.6 (Cc1), 53.4 (Cb4), 46.0 (Ca9), 40.5 (Cc2), 35.7 (Cb2), 32.6 (Ca11), 30.7 (Ca10), 29.2 (Cb3).

**HRMS-ESI (m/z)** calculated for C<sub>34</sub>H<sub>38</sub>N<sub>5</sub>O<sub>2</sub> [M+H]<sup>+</sup>: 548.3020; Found: 548.3026.

5

**General procedure for compounds 29 to 46, 48, 50 and 51:**

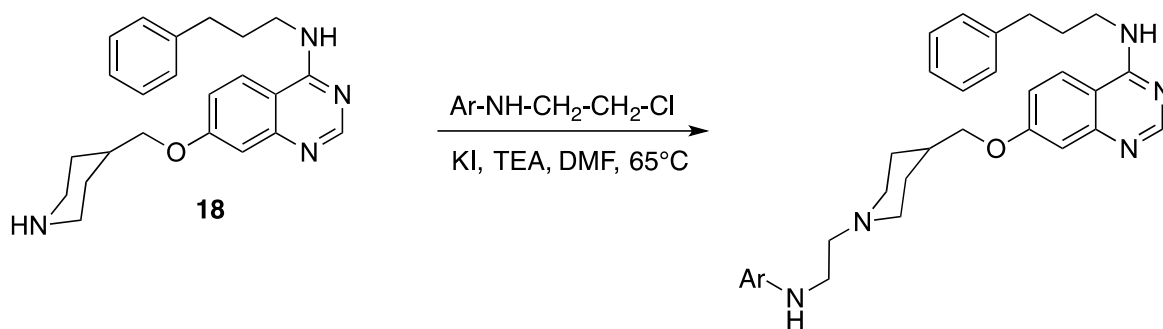

To a solution of 0.1M of **18**, K<sub>2</sub>CO<sub>3</sub> (2eq) and a catalytic amount of KI in DMF was added **the desired chloro-derivative** (2eq). The mixture was stirred at 65°C overnight then was diluted with ethyl acetate. The organic phase was washed with water and brine and dried over sodium sulfate. The solvent was removed and the residue was purified by silica gel flash chromatography using a linear gradient of ammonia 1N in methanol (0→10% MeOH/NH<sub>3</sub>) in dichloromethane or by reversed phase HPLC using a linear acetonitrile gradient with 0.01% of TEA (0→80% CH<sub>3</sub>CN) to afford compounds **29** to **51**.

15

**7-((1-(2-(naphthalen-1-ylamino)ethyl)piperidin-4-yl)methoxy)-4-(3-phenylpropylamino)quinazoline (29)** (18mg; 18μmol; yield 23%) as a white powder from **18** (30mg; 80μmol).

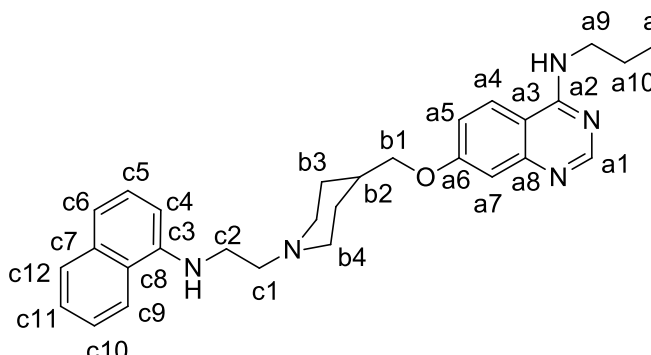

**<sup>1</sup>H NMR (500MHz, DMSO) δ** 8.37 (s, 1H, Ha1), 8.15 (d, *J*=9.2Hz, 1H, Ha4), 8.08 (t, *J*=5.5Hz, 1H, HNH<sub>a</sub>), 8.05 (dd, *J*=1.4, 7.6Hz, 1H, Hc9), 7.75 (brdd, *J*=1.8, 7.5Hz, 1H, Hc12), 7.45-7.39 (m, 2H, Hc10 and Hc11), 7.30-7.21 (m, 6H, Ha13, Ha14 and Hc5), 7.17 (dt, *J*=1.3, 6.8Hz, 1H), 7.14-7.09 (m, 2H, Ha5 and Hc6), 7.05 (d, *J*=2.6Hz, 1H, Ha7), 6.53 (d, *J*=7.6Hz, 1H, Hc4), 5.96 (t, *J*=5.2Hz, 1H, HNH<sub>c</sub>), 3.97 (d, *J*=5.9Hz, 2H, Hb1), 3.52 (q, *J*=6.9Hz, 2H, Ha9), 3.32 (m, 2H, Hc2), 2.99 (brd, *J*=11.3Hz, 2H, Hb4<sub>eq</sub>), 2.67 (m, 4H, Ha11 and Hc1), 2.05 (brt, *J*=10.8Hz, 2H, Hb4<sub>ax</sub>), 1.94 (quint, *J*=7.5Hz, 2H, Ha10), 1.79 (m, 3H, Hb2, Hb3<sub>eq</sub>), 1.38 (dq, *J*=2.4, 12.1Hz, 2H, Hb3<sub>ax</sub>).

**<sup>13</sup>C NMR (125MHz, DMSO) δ** 161.7 (Ca6), 159.1 (Ca2), 155.6 (Ca1), 151.4 (Ca8), 144.0 (Cc3), 141.8 (Ca12), 134.0 (Cc7), 128.3 (Ca13 and Ca14), 128.0 (Cc12), 126.9 (Cc5), 125.7 (Ca15), 125.6 (Cc10), 124.3 (Ca4), 124.1 (Cc11), 122.9 (Cc8), 121.2 (Cc9), 116.7 (Ca5), 115.4 (Cc6), 109.1 (Ca3), 107.5 (Ca7), 103.1 (Cc4), 72.3 (Cb1), 56.5 (Cc1), 53.0 (Cb4), 40.8 (Cc2), 40.1 (Ca9), 35.3 (Cb2), 32.7 (Ca11), 30.4 (Ca10), 28.7 (Cb3).

**HRMS-ESI (m/z)** calculated C<sub>35</sub>H<sub>40</sub>N<sub>5</sub>O [M+H]<sup>+</sup>: 546.3228; found: 546.3226.

**7-((1-(2-(naphthalen-1-ylamino)ethyl)piperidin-4-yl)methoxy)-4-(3-phenylpropylamino)quinazoline (30)**

Compound **30** (14mg; 26μmol; yield 32%) was obtained as a white powder from **18** (30mg; 80μmol).

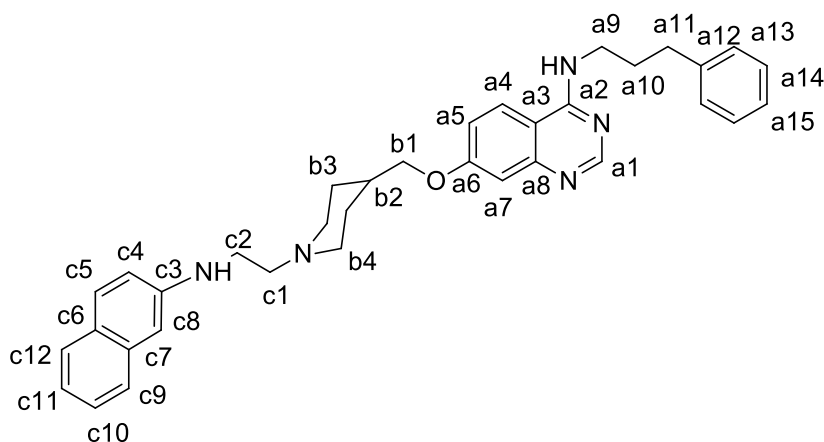

5

**<sup>1</sup>H NMR (500MHz, DMSO) δ** 8.39 (s, 1H, Ha1), 8.16 (d, *J*=9.1Hz, 1H, Ha4), 8.08 (t, *J*=5.4Hz, 1H, HNHa), 7.65-7.57 (m, 2H, Hc5 and Hc9), 7.33-7.22 (m, 5H, Ha13, Ha14 and Hc10), 7.18 (dt, *J*=1.0, 6.7Hz, 1H, Ha15), 7.13-7.09 (m, 2H, Ha5 and Hc11), 7.07 (d, *J*=2.6Hz, 1H, Ha7), 7.02 (dd, *J*=2.2, 8.9Hz, 1H, Hc4), 6.74 (d, *J*=1.9Hz, 1H, Hc8), 5.73 (t, *J*=5.3Hz, 1H, HNHa), 3.98 (d, *J*=6.0Hz, 2H, Hb1), 3.53 (q, *J*=6.9Hz, 2H, Ha9), 3.23 (q, *J*= 6.4Hz, 2H, Hc2), 2.98 (brd, *J*=11.3Hz, 2H, Hb4eq), 2.69 (t, *J*=7.2Hz, 2H, Ha11), 2.59 (t, *J*=6.4Hz, 2H, Hc1), 2.03 (brt, *J*=11.0Hz, 2H, Hb4ax), 1.95 (quint, *J*=7.4Hz, 2H, Ha10), 1.80 (m, 3H, Hb2, Hb3eq), 1.38 (m, 2H, Hb3ax).

**<sup>13</sup>C NMR (125MHz, CDCl<sub>3</sub>) δ** 162.2 (Ca6), 159.5 (Ca2), 156.1 (Ca1), 151.4 (Ca8), 147.1 (Cc3), 142.2 (Ca12), 135.6 (Cc7), 128.7 (Cc5, Ca13 and Ca14), 127.8 (Cc12), 126.9 (Cc6), 126.4 (Cc10), 126.2 (Ca15), 125.8 (Cc9), 124.7 (Ca4), 121.4 (Cc11), 118.8 (Cc4), 117.2 (Ca5),

109.5 (Ca3), 107.9 (Ca7), 102.7 (Cc8), 72.7 (Cb1), 57.4 (Cc1), 53.6 (Cb4), 41.0 (Cc2), 40.6 (Ca9), 35.8 (Cb2), 33.2 (Ca11), 30.8 (Ca10), 29.0 (Cb3).

**HRMS-ESI (m/z)** calculated C<sub>35</sub>H<sub>40</sub>N<sub>5</sub>O [M+H]<sup>+</sup>: 546.3228 [M+H]<sup>+</sup>; found: 546.3226.

5      **7-((1-(2-(quinolin-3-ylamino)ethyl)piperidin-4-yl)methoxy)-4-(3-phenylpropyl)quinazoline (31)** (15mg; 26μmol; yield 96%) as a white powder from **18** (10mg; 27μmol).

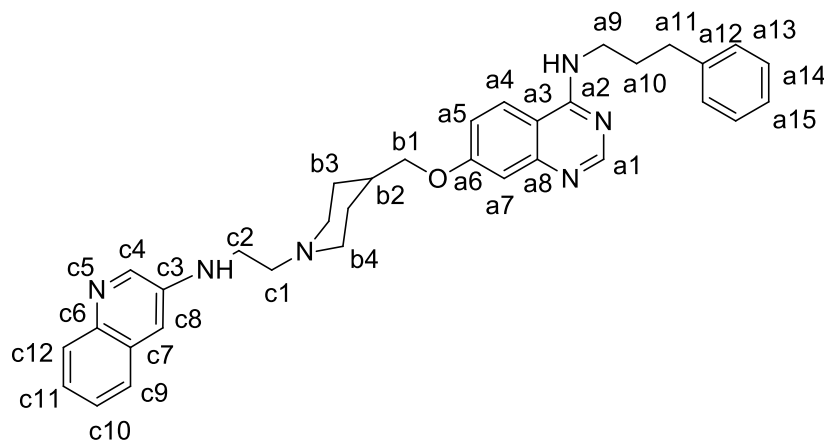

**<sup>1</sup>H NMR (500MHz, DMSO) δ** 8.52 (d, *J*=2.8Hz, 1H, Hc4), 8.39 (s, 1H, Ha1), 8.15 (d, *J*=9.1Hz, 1H, Ha4), 8.09 (t, *J*=5.6Hz, 1H, HNHa), 7.78 (d, *J*=8.1Hz, 1H, Hc12), 7.66 (d, *J*=8.1Hz, 1H, Hc9), 7.39 (d, *J*=8.1Hz, 1H, Hc10), 7.34-7.22 (m, 5H, Ha13, Ha14 and Hc11), 7.18 (t, *J*=7.1Hz, 1H, Ha15), 7.11 (dd, *J*=2.4, 9.1Hz, 1H, Ha5), 7.06 (m, 1H, Ha7 and Cc8), 6.12 (t, *J*=5.3Hz, 1H, HNHa), 3.98 (d, *J*=5.7Hz, 2H, Hb1), 3.53 (q, *J*=6.1Hz, 2H, Ha9), 3.24 (q, *J*= 5.9Hz, 2H, Hc2), 2.99 (brd, *J*=11.0Hz, 2H, Hb4eq), 2.68 (t, *J*=7.5Hz, 2H, Ha11), 2.59 (t, *J*=6.6Hz, 2H, Hc1), 2.03 (brt, *J*=11.0Hz, 2H, Hb4ax), 1.95 (quint, *J*=7.5Hz, 2H, Ha10), 1.79 (m, 3H, Hb2, Hb3eq), 1.38 (m, 2H, Hb3ax).

**<sup>13</sup>C NMR (125MHz, DMSO) δ** 162.1(Ca6), 159.5 (Ca2), 156.1 (Ca1), 151.8 (Ca8), 144.2 (Cc4), 143.0 (Cc3), 142.2 (Ca12), 141.2 (Cc6), 130.1 (Cc7), 128.9 (Cc12), 128.7 (Ca13 and Ca14), 126.9 (Cc10), 126.2 (Ca15 and Cc9), 124.7 (Ca4), 124.1 (Cc11), 117.2 (Ca5), 109.5 (Ca3), 107.9 (Ca7 and Cc8), 72.7 (Cb1), 57.1(Cc1), 53.5 (Cb4), 40.7 (Cc2), 40.6 (Ca9), 35.7 (Cb2), 33.1 (Ca11), 30.8 (Ca10), 29.0 (Cb3).

**HRMS-ESI (m/z)** calculated for C<sub>34</sub>H<sub>39</sub>N<sub>6</sub>O [M+H]<sup>+</sup>: 547.3180; found: 547.3180.

**N-(3-phenylpropyl)-7-((1-(2-(quinolin-5-ylamino)ethyl)piperidin-4-yl)methoxy)quinazolin-4-amine (32)** (16mg; 29μmol; yield 73%) as a white powder from **18** (15mg; 40μmol),

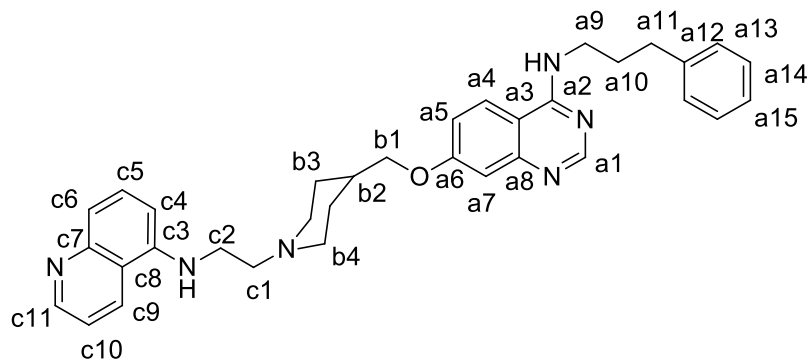

**<sup>1</sup>H NMR (500MHz, CDCl<sub>3</sub>) δ** 8.78 (dd, *J*=1.5, 4.2Hz, 1H, Hc11), 8.53 (d, *J*=8.5Hz, 1H, Hc9), 8.37 (s, 1H, Ha1), 8.14 (d, *J*=9.1Hz, 1H, Ha4), 8.09 (brt, *J*=5.4Hz, 1H, HNHa), 7.50 (t, *J*=8.1Hz, 1H, Hc5), 7.40 (dd, *J*=4.2, 8.5Hz, 1H, Hc10), 7.29-7.16 (m, 6H, Ha13, Ha14, Ha15, Hc6), 7.11 (dd, *J*=2.5, 9.1Hz, 1H, Ha5), 7.04 (d, *J*=2.6Hz, 1H, Ha7), 6.58 (d, *J*=7.8Hz, 1H, Hc4), 6.26 (brt, *J*=5.2Hz, 1H, HNHa), 3.98 (d, *J*=6.0Hz, 2H, Hb1), 3.53 (q, *J*=6.8Hz, 2H, Ha9), 3.33 (m, 2H, Hc2), 3.00 (brd, *J*=11.4Hz, 2H, Hb4eq), 2.66 (m, 4H, Ha11 and Hc1), 2.02

(brt,  $J=11.0\text{Hz}$ , 2H, Hb4ax), 1.94 (quint,  $J=7.7\text{Hz}$ , 2H, Ha10), 1.79 (m, 3H, Hb2, Hb3eq), 1.38 (dq,  $J=3.6, 11.0\text{Hz}$ , 2H, Hb3ax).

**$^{13}\text{C}$  NMR (125MHz,  $\text{CDCl}_3$ )  $\delta$**  161.7 (Ca6), 159.1 (Ca2), 155.6 (Ca1), 151.3 (Ca8), 149.8 (Cc11), 148.9 (Cc7), 144.5 (Cc3), 141.8 (Ca12), 130.4 (Cc6), 130.0 (Cc9), 128.3 (Ca13, Ca14),  
5 125.7 (Ca15), 124.3 (Ca4), 119.0 (Cc10), 117.9 (Cc8), 116.7 (Ca5), 116.1 (Cc5), 109.8 (Ca3), 107.5 (Ca7), 103.0 (Cc4), 72.3 (Cb1), 56.5 (Cc1), 53.1 (Cb4), 40.9 (Cc2), 40.1 (Ca9), 35.3 (Cb2), 32.7 (Ca11), 30.4 (Ca10), 28.6 (Cb3).

**HRMS-ESI ( $m/z$ )** calculated for  $\text{C}_{34}\text{H}_{39}\text{N}_6\text{O}$   $[\text{M}+\text{H}]^+$ : 547.3180; found: 547.3182.

10 **4-((3-phenylpropyl)amino)-7-((1-(2-(quinolin-6-ylamino)ethyl)piperidin-4-yl)methoxy)quinazoline (33)** (14mg;  $26\mu\text{mol}$ ; yield 96%) as a white powder from **18** (10mg;  $27\mu\text{mol}$ ):

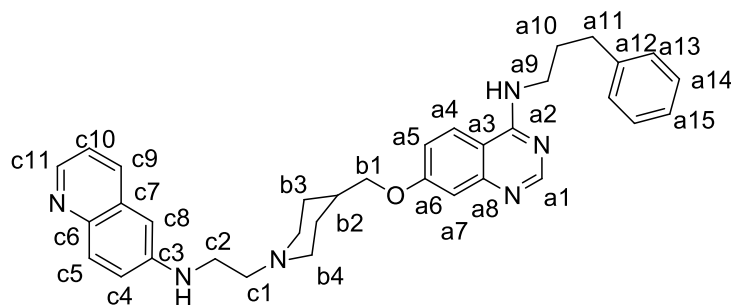

**$^1\text{H}$  NMR (500 MHz, DMSO)  $\delta$**  8.48 (dd,  $J= 1.63, 4.18\text{Hz}$ , 1H, Hc11), 8.38 (s, 1H, Ha1),  
15 8.15 (d,  $J=9.2\text{Hz}$ , 1H, Ha4), 8.09 (brt,  $J=5.5\text{Hz}$ , 1H, HNH), 7.99 (dd,  $J=0.9, 7.4\text{Hz}$ , 1H, Hc9), 7.70 (d,  $J=9.1\text{Hz}$ , 1H, Hc4), 7.32-7.22 (m, 6H, Ha13, Ha14, Hc5 and Hc10), 7.18 (dt,  $J=1.4, 7.3\text{Hz}$ , 1H, Ha15), 7.12 (dd,  $J=2.5, 9.1\text{Hz}$ , 1H, Ha5), 7.06 (d,  $J=2.6\text{Hz}$ , 1H, Ha7), 6.72 (d,  $J=5.4\text{Hz}$ , H1, Hc8), 5.99 (t,  $J=5.3\text{Hz}$ , 1H, HNH), 3.98 (d,  $J=5.9\text{Hz}$ , 2H, Hb1), 3.53 (q,  $J=6.0\text{Hz}$ , 2H, Ha9), 3.24 (q,  $J=5.9\text{Hz}$ , 2H, Hc2), 2.99 (brd,  $J=11.2\text{Hz}$ , 2H, Ha4eq), 2.68 (t,



$J=7.7\text{Hz}$ , 2H, Ha11), 2.59 (t,  $J=6.7\text{Hz}$ , 2H, Hc1.), 2.03 (brt,  $J=10.8\text{Hz}$ , 2H, Hb4ax), 1.94 (quint,  $J=7.4\text{Hz}$ , 2H, Ha10), 1.85-1.75 (m, 3H, Hb3eq and Hb2), 1.45-1.35 (m, 2H, Hb3ax).

**$^{13}\text{C}$  NMR (125MHz, DMSO)  $\delta$**  162.1 (Ca6), 159.5 (Ca2), 156.1 (Ca1), 151.8 (Ca8), 147.3 (Cc3), 145.4 (Cc11), 142.7 (Cc6), 142.2 (Ca12), 133.6 (Cc9), 130.5 (Cc7), 129.8 (Cc4), 128.8 (Ca14), 128.7 (Ca13), 126.2 (Ca15), 124.7 (Ca4), 122.1 (Cc5), 121.7 (Cc10), 117.2 (Ca5), 109.5 (Ca3), 107.9 (Ca7), 101.6 (Cc8), 72.7 (Cb1), 57.3 (Cc1), 53.6 (Cb4), 41.1 (Cc2), 40.5 (Ca9), 35.7 (Cb2), 33.1 (Ca11), 30.8 (Ca10), 29.0 (Cb3).

**HRMS-ESI ( $m/z$ )** calculated for  $\text{C}_{34}\text{H}_{39}\text{N}_6\text{O}$   $[\text{M}+\text{H}]^+$ : 547.3180; found: 547.3182.

**4-(3-phenylpropylamino)-7-((1-(2-(isoquinolin-5-ylamino)ethyl)piperidin-4-yl)methoxy)quinazoline (34)** (10mg; 18 $\mu\text{mol}$ ; yield 67%) as a white powder from **18** (10mg; 27 $\mu\text{mol}$ ).

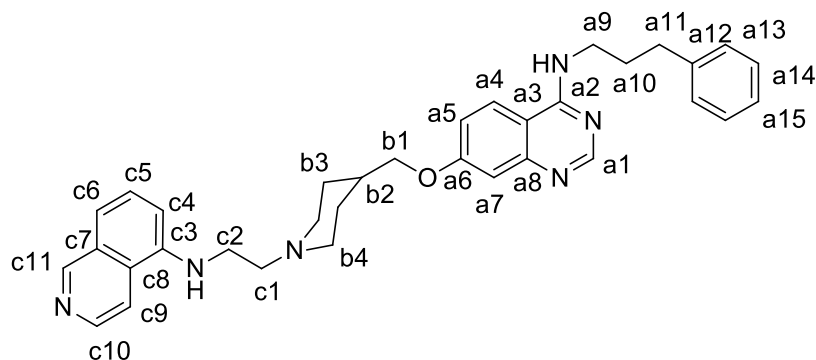

**$^1\text{H}$  NMR (500 MHz, DMSO)  $\delta$**  8.13 (s, 1H, Hc11), 8.41 (d,  $J=6.0\text{Hz}$ , 1H, Hc10), 8.38 (s, 1H, Ha1), 8.16 (d,  $J=9.2\text{Hz}$ , 1H, Ha4), 8.09 (brt,  $J=5.4\text{Hz}$ , 1H, HNH), 7.97 (d,  $J=6.0\text{Hz}$ , 1H, Hc9), 7.47 (t,  $J=7.9\text{Hz}$ , 1H, Hc5), 7.34-7.21 (m, 5H, Ha13, Ha14 and Hc6), 7.18 (dt,  $J=1.3$ , 7.2Hz, 1H, Ha15), 7.11 (dd,  $J=2.5$ , 9.1Hz, 1H, Ha5), 7.06 (d,  $J=2.6\text{Hz}$ , 1H, Ha7), 6.74 (d,  $J=7.7\text{Hz}$ , 1H, Hc4), 6.23 (t,  $J=5.3\text{Hz}$ , 1H, HNH), 3.98 (d,  $J=5.9\text{Hz}$ , 2H, Hb1), 3.53 (q,

$J=6.6\text{Hz}$ , 2H, Ha9), 3.52 (m, 2H, Hc2), 3.00 (brd,  $J=11.2\text{Hz}$ , 2H, Ha4eq), 2.67-2.61 (m, 4H, Ha11 and Hc1), 2.06 (brt,  $J=10.8\text{Hz}$ , 2H, Hb4ax), 1.95 (quint,  $J=7.4\text{Hz}$ , 2H, Ha10), 1.86-1.75 (m, 3H, Hb3eq and Hb2), 1.45-1.31 (m, 2H, Hb3ax).

**$^{13}\text{C}$  NMR (125MHz, DMSO)  $\delta$**  162.1 (Ca6), 159.5 (Ca2), 156.1 (Ca1), 152.6 (Cc11), 151.8 (Ca8), 143.6 (Cc3), 142.2(Ca12), 141.8 (Cc10), 129.6 (Cc8), 128.9 (Cc5), 128.7 (Ca13 and Ca14), 126.2 (Ca15), 125.8 (Cc7), 124.7 (Ca4), 117.2 (Ca5), 115.1 (Cc9), 114.5 (Cc6), 109.5 (Ca3), 107.9 (Ca7), 106.6 (Cc4), 72.7 (Cb1), 56.9 (Cc1), 53.5 (Cb4), 41.2 (Cc2), 40.6 (Ca9), 35.7 (Cb2), 33.1 (Ca11), 30.8 (Ca10), 29.1 (Cb3).

**HRMS-ESI (m/z)** calculated for  $\text{C}_{34}\text{H}_{39}\text{N}_6\text{O}$   $[\text{M}+\text{H}]^+$ : 547.3180; found: 547.3184.

10

**4-(3-phenylpropylamino)-7-((1-(2-(isoquinolin-4-ylamino)ethyl)piperidin-4-yl)methoxy)quinazoline (35)** (10mg;  $18\mu\text{mol}$ ; yield 67%) as a white powder from **18** (10mg;  $27\mu\text{mol}$ ).

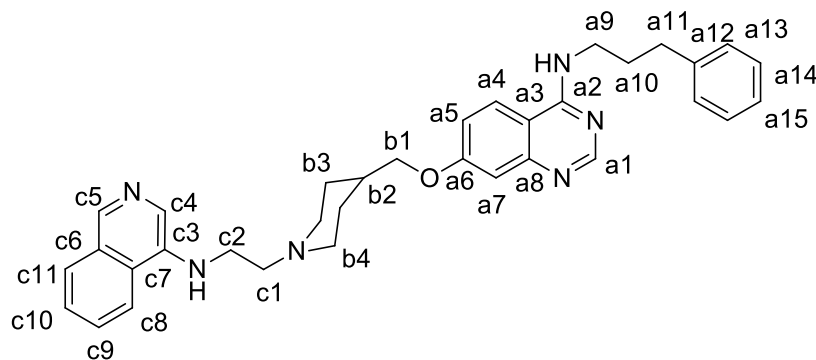

**$^1\text{H}$  NMR (500MHz, DMSO)  $\delta$**  8.56 (s, 1H, Hc5), 8.38 (s, 1H, Ha1), 8.15 (m, 2H, Ha4 and Hc8), 8.09 (brt,  $J=5.1\text{Hz}$ , 1H, HNH<sub>a</sub>), 7.96 (dd,  $J=0.7, 8.5\text{Hz}$ , 1H, Hc11), 7.78 (s, 1H, Hc4), 7.69 (ddd,  $J=1.3, 6.9, 8.3\text{Hz}$ , 1H, Hc9), 7.61 (ddd,  $J=0.9, 6.8, 7.9\text{Hz}$ , 1H, Hc10), 7.30-7.23 (m, 4H, Ha13, Ha14), 7.18 (m, 1H, Ha15), 7.13 (dd,  $J=2.6, 9.1\text{Hz}$ , 1H, Ha5), 7.00 (d,  $J=2.6\text{Hz}$ , 1H,

Ha7), 6.08 (brt,  $J=5.4\text{Hz}$ , 1H, HNHc), 3.98 (d,  $J=5.9\text{Hz}$ , 2H, Hb1), 3.53 (q,  $J=6.9\text{Hz}$ , 2H, Ha9), 3.37 (q,  $J=6.2\text{Hz}$ , 2H, Hc2), 3.02 (brd,  $J=11.3\text{Hz}$ , 2H, Hb4eq), 2.75 (m, 4H, Ha11 and Hc1), 2.02 (m, 2H, Hb4ax), 1.95 (quint,  $J=7.3\text{Hz}$ , 2H, Ha10), 1.80 (m, 3H, Hb2, Hb3eq and Hb2), 1.38 (m, 2H, Hb3ax).

5  **$^{13}\text{C}$  NMR (125MHz, DMSO)  $\delta$**  161.7 (Ca6), 159.1 (Ca2), 155.6 (Ca1), 151.4 (Ca8), 141.8 (Ca12), 139.8 (Cc5), 138.2.1 (Cc3), 128.4 (Cc9), 128.3 (Ca13 and Ca14), 128.2 (Cc7), 127.0 (Cc10), 125.7 (Ca15), 125.1 (Cc6), 124.3 (Ca4), 122.3 (Cc4), 116.7 (Ca5), 109.1 (Ca3), 107.5 (Ca7), 72.3 (Cb1), 56.5 (Cc1), 53.1 (Cb4), 40.6 (Cc2), 40.1 (Ca9), 35.3 (Cb2), 32.7 (Ca11), 30.4 (Ca10), 29.0 (Cb3).

10 **HRMS-ESI (m/z)** calculated for  $\text{C}_{34}\text{H}_{39}\text{N}_6\text{O}$   $[\text{M}+\text{H}]^+$ : 547.3180; found: 547.3185.

**4-(3-phenylpropylamino)-7-((1-(2-((1-methyl-1H-indol-3-yl)amino)ethyl)piperidin-4-yl)methoxy)quinazoline (36)** (10mg; 18 $\mu\text{mol}$ ; yield 67%) as a white powder from **18** (10mg; 27 $\mu\text{mol}$ ).

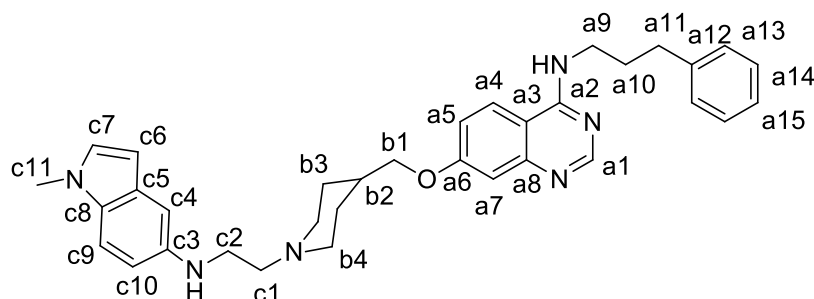

15

**$^1\text{H}$  NMR (500MHz, DMSO)  $\delta$**  8.85 (s, 1H, Ha1), 8.41 (d,  $J=9.8\text{Hz}$ , 1H, Ca4), 7.41 (dd,  $J=2.1, 9.3\text{Hz}$ , 1H, Ha5), 7.35-7.16 (m, 8H, Ha7, Ha13, Ha14, Ha15, Hc4 and Hc7), 6.79 (m, 1H, Hc6), 6.65 (brd,  $J=8.7\text{Hz}$ , 1H, Hc9), 6.20 (brd,  $J=2.8\text{Hz}$ , 1H, Hc10), 4.11 (d,  $J=4.8\text{Hz}$ , 2H, Hb1), 3.77-3.66 (m, 5H, Ha9 and Hc11), 3.60 (brd,  $J=11.5\text{Hz}$ , 2H, Hb4eq), 3.46 (t,  $J=6.2\text{Hz}$ ,

2H, Hc2), 3.39 (t,  $J=6.2\text{Hz}$ , 2H, Hc1), 3.11 (brd,  $J=11.5\text{Hz}$ , 2H, Hb4ax), 2.70 (t,  $J=7.6\text{Hz}$ , 2H, Ha11), 2.21-2.09 (m, 1H, Hb2), 1.73-1.61 (m, 2H, Hb3ax).

**$^{13}\text{C}$  NMR (125MHz, DMSO)  $\delta$**  164.1 (Ca6), 160.3 (Ca2), 158.3 (Ca8), 151.8 (Ca1), 141.7 (Ca12), 131.4 (Cc3), 129.8 (Cc7), 129.3 (Cc5), 128.8 (Ca13 and Ca14), 126.7 (Cc), 126.3 (Ca15), 118.7 (Ca5), 111.9 (Cc9), 110.6 (Ca7), 107.2 (Ca3), 101.1 (Cc4 and Cc6), 99.4 (Cc10), 72.0 (Cb1), 55.0(Cc1), 51.8 (Cb4), 39.4 (Cc2), 41.7 (Ca9), 32.9 (Cb2 and Cc11), 32.8 (Ca11), 30.2 (Ca10), 25.6 (Cb3).

**HRMS-ESI ( $m/z$ )** calculated for  $\text{C}_{34}\text{H}_{41}\text{N}_6\text{O}$   $[\text{M}+\text{H}]^+$ : 549.3336; found: 549.3348.

**7-((1-(2-(4-dimethylaminonaphthalen-1-ylamino)ethyl)piperidin-4-yl)methoxy)-4-(3-phenylpropylamino)quinazoline (37)** (18mg; 18 $\mu\text{mol}$ ; yield 23%) was obtained as a white powder from **18** (30mg; 80 $\mu\text{mol}$ ).

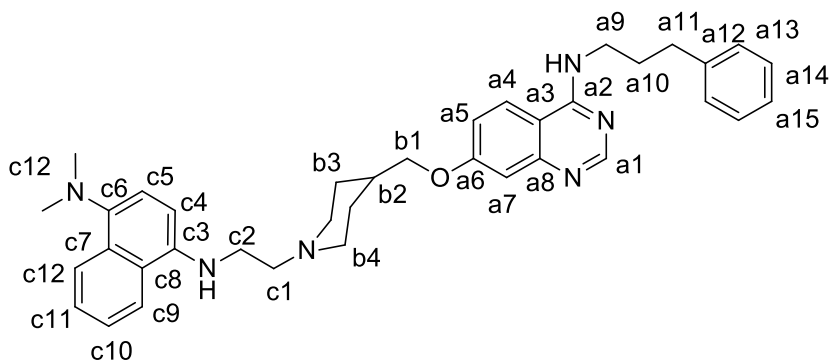

**$^1\text{H}$  NMR (500MHz, DMSO)  $\delta$**  8.38 (s, 1H, Ha1), 8.15 (d,  $J=9.1\text{Hz}$ , 1H, Ha4), 8.09 (t,  $J=5.3\text{Hz}$ , 1H, HNHa), 8.03 (d,  $J=8.1\text{Hz}$ , 1H, Hc9), 7.50-7.40 (m, 2H, Hc10 and Hc11), 7.32-7.21 (m, 4H, Ha13 and Ha14), 7.18 (dt,  $J=1.3, 7.1\text{Hz}$ , 1Ha15), 7.12 (dd,  $J=2.4, 9.1\text{Hz}$ , 1H, Ha5), 7.05 (m, 2H, Ha7 and Hc5), 6.48 (m, 1H, Hc4), 5.67 (t,  $J=5.0\text{Hz}$ , 1H, HNHC), 3.98 (d,  $J=5.8\text{Hz}$ , 2H, Hb1), 3.53 (q,  $J=6.6\text{Hz}$ , 2H, Ha9), 3.30-3.24 (m, 2H, Hc2), 3.0 (brd,  $J=10.9\text{Hz}$ ,

2H, Hb4eq), 2.70 (s, 6H, Hc12), 2.69-2.62 (m, 4H, Ha11 and Hc1), 2.07 (brt,  $J=10.9\text{Hz}$ , 2H, Hb4ax), 1.95 (quint,  $J=7.5\text{Hz}$ , 2H, Ha10), 1.81 (m, 3H, Hb2, Hb3eq), 1.44-1.32 (m, 2H, Hb3ax).

**$^{13}\text{C}$  NMR (125MHz, DMSO)  $\delta$**  161.7 (Ca6), 159.5 (Ca2), 156.1 (Ca1), 151.8 (Ca8), 142.2 (Ca12), 140.8 (Cc3), 129.8 (Cc7), 128.8 (Ca13 and Ca14), 126.2 (Ca15), 125.6 (Cc11), 124.8 (Cc10), 124.7 (Ca4), 124.6 (Cc8), 124.2 (Cc12), 117.2 (Ca5), 116.1 (Cc5), 109.6 (Ca3), 107.9 (Ca7), 103.1 (Cc4), 103.5 (Cc4), 72.7 (Cb1), 57.1 (Cc1), 53.50 (Cb4), 45.9 (Cc12), 41.5 (Cc2), 40.6 (Ca9), 35.8 (Cb2), 33.2 (Ca11), 30.8 (Ca10), 29.2 (Cb3).

**HRMS-ESI (m/z)** calculated for  $\text{C}_{37}\text{H}_{45}\text{N}_6\text{O}$   $[\text{M}+\text{H}]^+$ : 589.3649; found: 589.3655.

10

**4-(3-phenylpropylamino)-7-((1-(2-(pyridin-4-ylamino)ethyl)piperidin-4-yl)**

**methoxy)quinazoline (38)** (9.2mg; 19 $\mu\text{mol}$ ; yield 69%) as a white powder from **18** (10mg; 27 $\mu\text{mol}$ ).

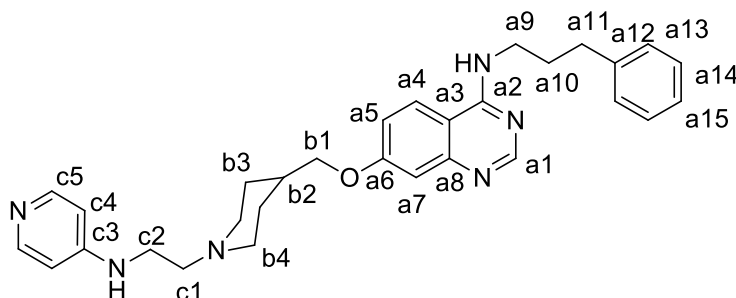

**$^1\text{H}$  NMR (500MHz,  $\text{CDCl}_3$ )  $\delta$**  8.57 (s, 1H, Ha1), 8.18 (dd,  $J=1.5, 4.8\text{Hz}$ , 2H, Hc5), 7.32-7.28 (m, 3H, Ha4 and Ha13), 7.25-7.20 (m, 3H, Ha15 and Ha14), 7.12 (d,  $J=2.5\text{Hz}$ , 1H, Ha7), 7.00 (dd,  $J=2.5, 9.0\text{Hz}$ , 1H, Ha5), 6.44 (dd,  $J=1.5, 4.8\text{Hz}$ , 2H, Hc4), 5.96 (brt,  $J=5.2$ , 1H, HNHC), 3.94 (d,  $J=6.0\text{Hz}$ , 2H, Hb1), 3.70 (q,  $J=6.8\text{Hz}$ , 2H, Ha9), 3.19 (q,  $J=5.5\text{Hz}$ , 2H, Hc2), 2.95 (brd,  $J=11.4\text{Hz}$ , 2H, Hb4eq), 2.79 (t,  $J=7.3\text{Hz}$ , Ha11), 2.62 (t,  $J=6.2\text{Hz}$ , 2H, Hc1), 2.09

(quint,  $J=6.8\text{Hz}$ , 2H, Ha10), 2.05 (dt,  $J=2.1, 9.8\text{Hz}$ , 2H, Hb4ax), 1.90 (m, 1H, Hb2), 1.87 (d,  $J=12.2\text{Hz}$ , 2H, Hb3eq), 1.44 (dq,  $J=2.9-12.2\text{Hz}$ , 2H, Hb3ax).

**$^{13}\text{C}$  NMR (125MHz,  $\text{CDCl}_3$ )  $\delta$**  162.2 (Ca6), 159.0 (Ca2), 155.9 (Ca1), 153.3 (Cc5), 151.5 (Ca8), 149.9 (Cc3), 141.5 (Ca12), 128.6 (Ca13), 128.4 (Ca14), 126.1 (Ca15), 121.8 (Ca4),  
5 117.9 (Ca5), 109.0 (Ca3), 107.8 (Ca7), 107.6 (Cc4), 72.7 (Cb1), 56.3 (Cc1), 53.0 (Cb4), 41.1 (Ca9), 38.9 (Cc2), 35.6 (Cb2), 33.6 (Ca11), 30.7 (Ca10), 29.0 (Cb3).

**HRMS-ESI ( $m/z$ )** calculated for  $\text{C}_{30}\text{H}_{37}\text{N}_7\text{O}$   $[\text{M}+\text{H}]^+$ : 497.3023; found: 497.3025.

**4-(3-phenylpropylamino)-7-((1-(2-(2-methylpyridin-4-ylamino)ethyl)piperidin-4-yl)methoxy)quinazoline (39)** (3.0mg; 5.5 $\mu\text{mol}$ ; yield 11%) as a white powder from **18** (20mg; 53 $\mu\text{mol}$ )

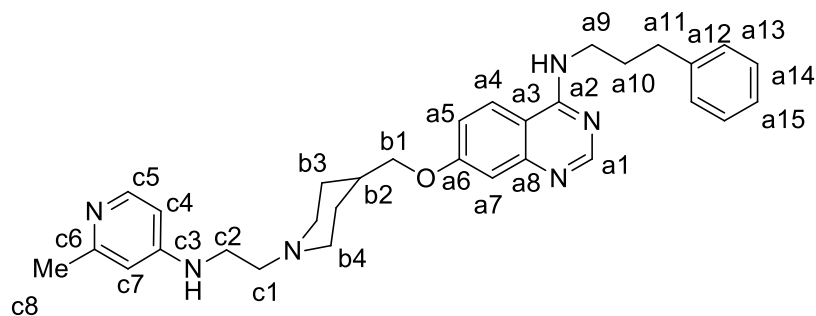

**$^1\text{H}$  NMR (500MHz, DMSO)  $\delta$**  8.38 (s, 1H, Ha1), 8.15 (d,  $J=9.2\text{Hz}$ , 2H, Ha4), 8.10 (t,  $J=5.4\text{Hz}$ , 1H, HNHa), 7.88 (d,  $J=5.7\text{Hz}$ , 1H, Hc7), 7.33-7.22 (m, 3H, Ha14 and Ha13), 7.18 (t,  $J=7.2\text{Hz}$ , 1H, Ha15), 7.11 (dd,  $J=2.6, 9.1\text{Hz}$  1H, Ha5), 7.05 (d,  $J=2.6\text{Hz}$ , 1H, Ha7), 6.36 (d,  $J=2.2\text{Hz}$ , 1H, Hc7), 6.33 (dd,  $J=2.2, 5.7\text{Hz}$ , 1H, Hc4), 6.21 (brt,  $J=5.3$ , 1H, HNHC), 3.97 (d,  $J=5.9\text{Hz}$ , 2H, Hb1), 3.53 (q,  $J=6.6\text{Hz}$ , 2H, Ha9), 3.16 (q,  $J=6.2\text{Hz}$ , 2H, Hc2), 2.94 (brd,  $J=11.1\text{Hz}$ , 2H, Hb4eq), 2.68 (t,  $J=7.7\text{Hz}$ , Ha11), 2.48 (t,  $J=6.8\text{Hz}$ , 2H, Hc1), 2.25 (s, 3H, Hc8),  
15

2.05-1.91 (m, 4H, Hb4ax and Ha10), 1.84-1.73 (m, 3H, Hb2 and Hb3eq), 1.43-1.41 (m, 2H, Hb3ax).

**$^{13}\text{C}$  NMR (125MHz, DMSO)  $\delta$**  162.1 (Ca6), 159.5 (Ca2), 157.8 (Cc6), 156.1 (Ca1), 154.3 (Cc3), 151.8 (Ca8), 149.1 (Cc7), 142.2 (Ca12), 128.7 (Ca13 and Ca14), 126.2 (Ca15), 124.7 (Ca4), 117.2 (Ca5), 109.5 (Ca3), 107.9 (Ca7), 106.1 (Cc7), 105.4 (Cc4), 72.7 (Cb1), 57.2 (Cc1), 53.5 (Cb4), 40.5 (Ca9), 39.8 (Cc2), 35.7 (Cb2), 33.1 (Ca11), 30.8 (Ca10), 28.9 (Cb3).

**HRMS-ESI (m/z)** calculated for  $\text{C}_{31}\text{H}_{39}\text{N}_6\text{O}$   $[\text{M}+\text{H}]^+$ : 511.3180; found: 511.3181.

**4-(3-phenylpropylamino)-7-((1-(2-(anilin-4-ylamino)ethyl)piperidin-4-yl)methoxy)quinazoline (40)** (23mg; 45 $\mu\text{mol}$ ; yield 21%) as a white powder from **18** (80mg; 212 $\mu\text{mol}$ ).

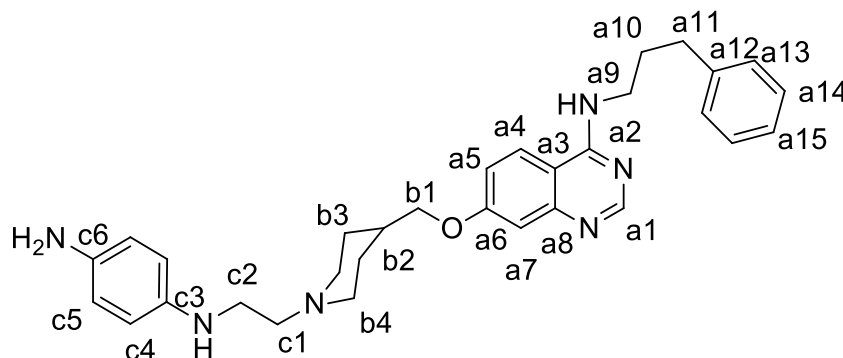

**$^1\text{H}$  NMR (500MHz, DMSO)  $\delta$**  8.38 (s, 1H, Ha1), 8.15 (d,  $J=9.1\text{Hz}$ , 1H, Ha4), 8.09 (brt,  $J=5.5\text{ Hz}$ , 1H, HNH), 7.32-7.21 (m, 4H, Ha13 and Ha14), 7.17 (t,  $J=7.0\text{Hz}$ , 1H, Ha15), 7.11 (dd,  $J=2.9, 9.2\text{Hz}$ , 1H, Ha5), 7.05 (d,  $J=2.4\text{Hz}$ , 1H, Ha7), 6.45-6.36 (m, 4H, Hc4 and Hc5), 3.97 (d,  $J=5.9\text{Hz}$ , 2H, Hb1), 3.53 (q,  $J=6.2\text{Hz}$ , 2H, Ha9), 3.00 (t,  $J=6.6\text{ Hz}$ , 2H, Hc2), 2.97-2.85 (m, 2H, Hb4eq), 2.68 (t,  $J=8.0\text{Hz}$ , 2H, Ha11), 2.47 (t,  $J=7.1\text{Hz}$ , 2H, Hc1), 2.01-1.90 (m, 2H, Ha10 and Hb4ax), 1.83-1.73 (m, 3H, Hb3eq and Hb2), 1.42-1.29 (m, 2H, Hb3ax).

**<sup>13</sup>C NMR (125MHz, DMSO) δ** 162.1 (Ca6), 159.5 (Ca2), 156.0 (Ca1), 151.7 (Ca8), 142.2 (Ca12), 140.7 (Cc3), 139.6 (Cc6), 128.8 (Cca14), 128.7 (Ca13), 126.2 (Ca15), 124.7 (Ca4), 117.2 (Ca5), 115.9 (Cc4), 114.2 (Cc5), 109.5 (Ca3), 107.9 (Ca7), 72.7 (Cb1), 57.8 (Cc1), 53.5 (Cb4), 42.1 (Cc2), 40.5 (Ca9), 35.8 (Cb2), 33.1 (Ca11), 30.8 (Ca10), 29.0 (Cb3).

5 **HRMS-ESI (m/z)** calculated for C<sub>31</sub>H<sub>39</sub>N<sub>6</sub>O [M+H]<sup>+</sup>: 511.3180; found: 511.3180.

**7-((1-(2-((2-methylquinolin-4-yl)amino)ethyl)piperidin-4-yl)methoxy)-N-(3-phenylpropyl)quinazolin-4-amine (41)** (16mg; 29μmol; yield 72%) as a white powder from **18** (15mg; 40μmol).

10

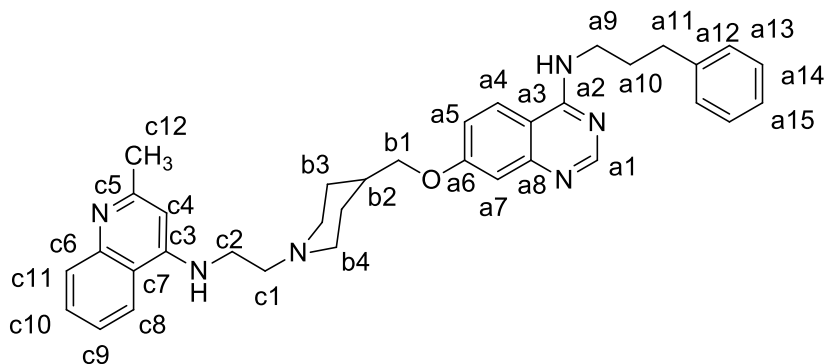

**<sup>1</sup>H NMR (500MHz, DMSO) δ** 8.38 (s, 1H, Ha1), 8.16 (d, *J*=9.2Hz, 1H, Ha4), 8.10 (brs, 2H, Hc8 and HNHa), 7.69 (d, *J*= 8.0Hz, 1H, Hc11), 7.55 (d, *J*= 7.6Hz, 1H, Hc10), 7.69 (brt, 15 *J*=7.5, 1H, Hc9), 7.30-7.23 (m, 4H, Ha13 and Ha14), 7.18 (m, 1H, Ha15), 7.11 (dd, *J*=2.4, 9.1Hz, 1H, Ha5), 7.06 (d, *J*=2.4Hz, 1H, Ha7), 6.87 (brt, *J*=5.3Hz, 1H, HNHa), 6.39 (s, 1H, Hc4), 3.98 (d, *J*=5.8Hz, 2H, Hb1), 3.53 (q, *J*=6.7Hz, 2H, Ha9), 3.39 (q, *J*=6.3Hz, 2H, Hc2), 3.00 (brd, *J*=10.9Hz, 2H, Ha4eq), 2.68 (t, *J*=7.6Hz ; 2H, Ha11), 2.64 (t, *J*=6.8Hz, 2H, Hc1),



2.47 (s, 3H, Hc12), 2.06 (brt,  $J=11.7\text{Hz}$ , 2H, Hb4ax), 1.95 (quint,  $J=7.6\text{Hz}$ , Ha10), 1.80 (m, 3H, Hb3eq)

$^{13}\text{C}$  NMR (125MHz, DMSO)  $\delta$  161.7 (Ca6), 159.1 (Ca2), 158.7 (Cc5), 155.6 (Ca1), 151.4 (Ca8), 149.9 (Cc3), 148.1 (Cc6), 128.6 (Ca10), 128.4 (Cc11), 128.29 (Ca13, Ca14), 125.7 (Ca15), 124.3 (Ca4), 123.5 (Cc9), 121.2 (Cc8), 117.5 (Cc7), 116.7 (Ca5), 109.1 (Ca3), 107.5 (Ca7), 98.2 (Cc4), 72.2 (Cb1), 56.3 (Cc1), 53.1 (Cb4), 40.13 (Cc2), 40.11 (Ca9), 35.3 (Cb2), 32.7 (Ca11), 30.4 (Ca10), 28.6 (Cb3), 25.3 (Cc12).

HRMS-ESI ( $m/z$ ) calculated for  $\text{C}_{35}\text{H}_{41}\text{N}_6\text{O}$   $[\text{M}+\text{H}]^+$ : 561.3337; found: 561.3341.

10 **4-(3-phenylpropyl)-7-((1-(2-((2-(trifluoromethyl)quinolin-4-yl)amino)ethyl)piperidin-4-yl)methoxy)quinazoline (42)** (21mg; 34 $\mu\text{mol}$ ; yield 86%) as a white powder from **18** (15mg; 40 $\mu\text{mol}$ )

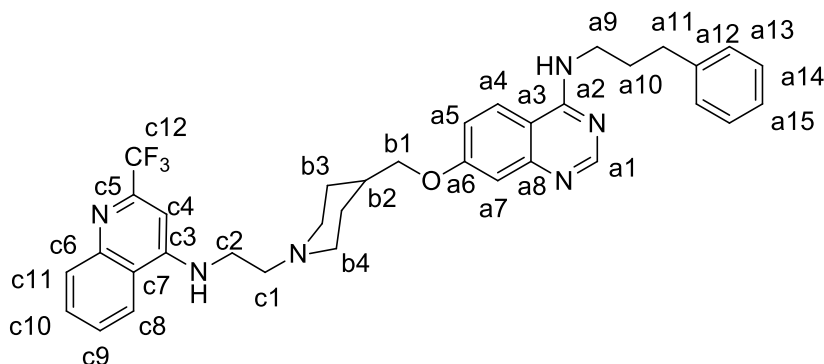

15  $^1\text{H}$  NMR (500MHz, DMSO)  $\delta$  8.37 (s, 1H, Ha1), 8.29 (d,  $J=8.5\text{Hz}$ , 1H, Hc8), 8.15 (d,  $J=9.2\text{Hz}$ , 1H, Ha4), 8.08 (d,  $J=5.3\text{Hz}$ , 1H, HNHa), 7.90 (dd,  $J=1.0, 8.5\text{Hz}$ , 1H, Hc11), 7.34 (ddd,  $J=1.1, 6.8, 8.0\text{Hz}$ , 1H, Hc10), 7.63 (brt,  $J=5.0\text{Hz}$ , 1H, HNHC), 7.57 (ddd,  $J=1.3, 7.1, 8.2\text{Hz}$ , 1H, Hc9), 7.29-7.22 (m, 4H, Ha13 and Ha14) 7.17 (m, 1H, Ha15), 7.10 (dd,  $J=2.5,$

9.1Hz, 1H, Ha5), 7.04 (d,  $J=2.6$ Hz, 1H, Ha7), 6.81 (s, 1H, Hc4), 3.96 (d,  $J=5.8$ Hz, 2H, Hb1), 3.51 (m, 4H, Ha9, Hc2), 3.00 (brd,  $J=11.1$ Hz, 2H, Hb4eq), 2.67 (t,  $J=7.4$ Hz; 2H, Ha11), 2.64 (t,  $J=6.7$ Hz, 2H, Hc1), 2.05 (brt,  $J=11.4$ Hz, 2H, Hb4ax), 1.94 (quint,  $J=7.5$ Hz, Ha10), 1.78 (m, 3H, Hb3eq and Hb2), 1.36 (dq,  $J=2.0, 12.0$ Hz, 2H, Hb3ax).

5  **$^{13}\text{C}$  NMR (125MHz, DMSO)  $\delta$**  161.7 (Ca6), 159.1 (Ca2), 155.7 (Ca1), 152.0 (Cc3), 151.4 (Ca8), 147.5 (q,  $J=32.1$ Hz, Cc12), 147.1 (Cc6), 141.8 (Ca12), 130.3 (Cc10), 129.5 (Cc11), 128.3 (Ca13, Ca14), 126.0 (Cc9), 125.8 (Ca15), 124.3 (Ca4), 122.1 (q,  $J=274.5$ Hz, Cc5), 121.8 (Cc8), 118.8 (Cc7), 116.7 (Ca5), 109.1 (Ca3), 107.5 (Ca7), 93.4 (q,  $J=2.6$ Hz, Cc4), 72.3 (Cb1), 56.3 (Cc1), 53.1 (Cb4), 40.5 (Cc2), 40.1 (Ca9), 35.3 (Cb2), 32.7 (Ca11), 30.4 (Ca10), 28.6  
10 (Cb3).

**HRMS-ESI (m/z)** calculated  $\text{C}_{35}\text{H}_{38}\text{F}_3\text{N}_6\text{O}$   $[\text{M}+\text{H}]^+$ : 615.3054; found: 615.3059.

**4-(3-phenylpropyl)-7-((1-(2-((7-(trifluoromethyl)quinolin-4-yl)amino)ethyl)**

**piperidin-4-yl)methoxy)quinazoline (43)** (24mg; 39 $\mu\text{mol}$ ; yield 98%) as a white powder from

15 **18** (15mg; 40 $\mu\text{mol}$ ).

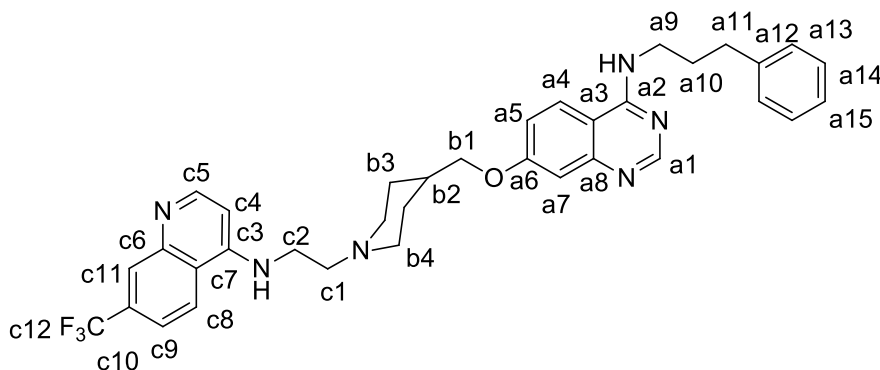

**$^1\text{H}$  NMR (500MHz, DMSO)  $\delta$**  8.51 (d,  $J=5.4$ Hz, 1H, Hc5), 8.43 (d,  $J=8.9$ Hz, 1H, Hc8), 8.37 (s, 1H, Ha1), 8.14 (d,  $J=9.2$ Hz, 1H, Ha4), 8.10 (brs, 2H, Hc11, HNHa), 7.69 (dd,  $J=1.9,$

8.9Hz, 1H, Hc9), 7.35 (brt,  $J=5.2$ Hz, 1H, HNHc), 7.29-7.22 (m, 4H, Ha13 and Ha14) 7.17 (m, 1H, Ha15), 7.10 (dd,  $J=2.6, 9.1$ Hz, 1H, Ha5), 7.04 (d,  $J=2.6$ Hz, 1H, Ha7), 6.61 (d,  $J=5.5$ Hz, 1H, Hc4), 3.96 (d,  $J=6.0$ Hz, 2H, Hb1), 3.53 (q,  $J=6.6$ Hz, 2H, Ha9), 3.42 (q,  $J=6.4$ Hz, 2H, Hc2), 2.99 (brd,  $J=11.1$ Hz, 2H, Hb4eq), 2.67 (t,  $J=7.7$ Hz, 2H, Ha11), 2.63 (t,  $J=6.9$ Hz, 2H, Hc1), 2.04 (brt,  $J=10.4$ Hz, 2H, Hb4ax), 1.94 (quint,  $J=7.7$ Hz, Ha10), 1.78 (m, 3H, Hb3eq and Hb2), 1.44-1.31 (dq,  $J=2.5, 12.4$ , 2H, Hb3ax).

**$^{13}\text{C}$  NMR (125MHz, DMSO)  $\delta$**  161.7 (Ca6), 159.1 (Ca2), 155.6 (Ca1), 152.3 (Cc5), 151.4 (Ca8), 149.9 (Cc3), 147.5 (Cc6), 141.7 (Ca12), 129.1 (q,  $J=31.9$ Hz, Cc12), 128.29 (Ca13, Ca14), 126.4 (q,  $J=4.2$ Hz, Cc11), 125.7 (Ca15), 124.3 (Ca4), 124.2 (q,  $J=274.7$ Hz, Cc10), 123.8 (Cc8), 120.9 (Cc7), 116.0 (brq,  $J=3.1$ Hz, Cc9), 116.7 (Ca5), 109.1 (Ca3), 107.5 (Ca7), 99.8 (Cc4), 72.2 (Cb1), 56.0 (Cc1), 53.1 (Cb4), 40.3 (Cc2), 40.1 (Ca9), 35.2 (Cb2), 32.7 (Ca11), 30.4 (Ca10), 28.6 (Cb3).

**HRMS-ESI (m/z)** calculated  $\text{C}_{35}\text{H}_{38}\text{F}_3\text{N}_6\text{O}$   $[\text{M}+\text{H}]^+$ : 615.3054; found: 615.3062.

**4-((3-phenylpropyl)amino)-7-((1-(2-(7-chloroquinolin-4-ylamino)ethyl) piperidin-4-yl)methoxy)quinazoline (44)** (15mg; 26 $\mu\text{mol}$ ; yield 97%) from **18** (10mg; 27 $\mu\text{mol}$ ):

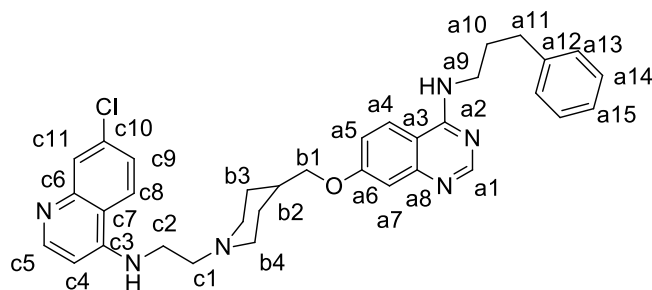

**$^1\text{H}$  NMR (500MHz, DMSO)  $\delta$**  8.41 (d,  $J= 5.3$ Hz, 1H, Hc5), 8.38 (s, 1H, Ha1), 8.23 (d,  $J=9.1$ Hz, 1H, Hc8), 8.15 (d,  $J=9.2$ Hz, 1H, Ha4), 8.09 (brt,  $J=5.5$ Hz, 1H, HNH), 7.79 (d,

$J=2.3\text{Hz}$ , 1H, Hc11), 7.46 (dd,  $J=2.2$ , 7.3, 8.9Hz, 1H, Hc9), 7.32-7.15 (m, 5H, Ha13, Ha14 and Ha15), 7.11 (dd,  $J=2.6$ , 9.1Hz, 1H, Ha5), 7.05 (d,  $J=2.6\text{Hz}$ , 1H, Ha7), 6.51 (d,  $J=5.4\text{Hz}$ , 1H, Hc4), 3.98 (d,  $J=5.9\text{Hz}$ , 2H, Hb1), 3.53 (q,  $J=6.1\text{Hz}$ , 2H, Ha9), 3.41 (q,  $J=6.5\text{Hz}$ , 2H, Hc2), 3.01 (brd,  $J=11.2\text{Hz}$ , 2H, Ha4eq), 2.68 (t,  $J=7.5\text{Hz}$ ; 2H, Ha11,) 2.62 (t,  $J=7.1\text{Hz}$ , 2H, Hc1,),  
 5 2.06 (t,  $J=11.1\text{Hz}$ , 2H, Hb4ax), 1.95 (q,  $J=7.5\text{Hz}$ , Ha10), 1.83-1.73 (m, 3H, Hb3eq and Hb2), 1.43-1.31 (m, 2H, Hb3ax).

**$^{13}\text{C}$  NMR (125MHz, DMSO)  $\delta$**  162.1 (Ca6), 159.5 (Ca2), 156.1 (Ca1), 152.4 (Cc5), 151.8 (Ca8), 150.4 (Cc3), 149.5 (Cc6), 142.2 (Ca12), 133.8 (Cc10), 128.8 (Ca14), 128.7 (Ca13), 128.0 (Cc11), 126.2 (Ca15), 124.7 (Ca4), 124.5 (Cc9), 124.4 (Cc8), 117.9 (Cc7), 117.2 (Ca5),  
 10 109.5 (Ca3), 107.9 (Ca7), 99.2 (Cc4), 72.7 (Cb1), 56.6 (Cc1), 53.5 (Cb4), 40.7 (Ca9), 40.5 (Cc2), 35.7 (Cb2), 33.1 (Ca11), 30.8 (Ca10), 29.0 (Cb3).

**HRMS-ESI (m/z)** calculated for  $\text{C}_{34}\text{H}_{38}\text{ClN}_6\text{O}$   $[\text{M}+\text{H}]^+$ : 581.2790; found: 581.2791.

**4-(3-phenylpropylamino)-7-((1-(2-((2,8-dimethylquinolin-4-yl)amino)ethyl)piperidin-4-yl)methoxy)quinazoline (45)** (23mg, 40 $\mu\text{mol}$ , yield 38%) as a white powder from **18** (40mg; 106 $\mu\text{mol}$ ).

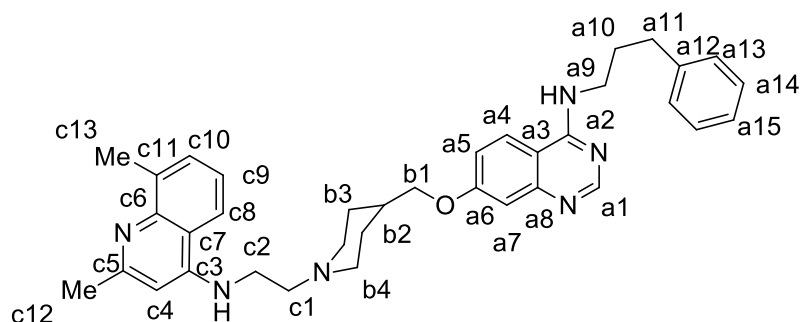

**<sup>1</sup>H NMR (500MHz, DMSO) δ** 8.39 (s, 1H, Ha1), 8.16 (d, *J*=9.2Hz, 1H, Ha4), 8.10 (brt, *J*=4.4Hz, 1H, HNH), 7.92 (d, *J*= 8.4Hz, 1H, Hc8), 7.42 (d, *J*=6.9Hz, 1H, Hc10), 7.32-7.21 (m, 5H, Hc9, Ha13 and Ha14), 7.18 (t, *J*=7.1Hz, 1H, Ha15), 7.11 (dd, *J*=2.4, 9.0Hz, 1H, Ha5), 7.06 (d, *J*=2.5Hz, 1H, Ha7), 6.78 (brt, *J*=5.3Hz, 1H, HNH), 6.40 (s, 1H, Hc4), 3.97 (d, *J*=4.7Hz, 2H, Hb1), 3.53 (q, *J*=6.6Hz, 2H, Ha9), 3.41-3.36 (m, 2H, Hc2), 3.00 (brd, *J*=10.2Hz, 2H, Ha4eq), 2.68 (t, *J*=7.7Hz; 2H, Ha11), 2.63 (t, *J*=6.8Hz, 2H, Hc1), 2.60 (s, 3H, Hc13), 2.48 (s, 3H, Hc12), 2.04 (brt, *J*=11.2Hz, 2H, Hb4ax), 1.95 (quint, *J*=7.4Hz, Ha10), 1.85-1.73 (m, 3H, Hb3eq and Hb2), 1.44-1.31 (m, 2H, Hb3ax).

**<sup>13</sup>C NMR (125MHz, DMSO) δ** 162.1 (Ca6), 159.5(Ca2), 157.9 (Cc5), 156.1 (Ca1), 151.8 (Ca8), 150.6(Cc3), 147.3 (Cc10), 142.2 (Ca12), 135.9 (Cc11), 129.3 (Cc10), 128.7 (Ca14 and Ca13), 126.2 (Ca15), 124.7 (Ca4), 123.0 (Cc9), 119.4 (Cc8), 117.5 (Cc7), 117.2 (Ca5), 109.5 (Ca3), 107.9 (Ca7), 98.6 (Cc4), 72.7 (Cb1), 56.7 (Cc1), 53.5 (Cb4), 40.6 (Cc2), 40.5 (Ca9), 35.7 (Cb2), 33.1 (Ca11), 30.8 (Ca10), 29.1 (Cb3), 26.2 (Cc12), 19.0 (Cc13).

**HRMS-ESI (m/z)** calculated for C<sub>36</sub>H<sub>43</sub>N<sub>6</sub>O [M+H]<sup>+</sup>: 575.3493; found: 575.3494.

**4-((3-phenylpropyl)amino)-7-((1-(2-(7-methoxyquinolin-4-ylamino)ethyl) piperidin-4-yl)methoxy)quinazoline (46)** (43mg; 75μmol; yield 71%) from **18** (40mg; 106μmol):

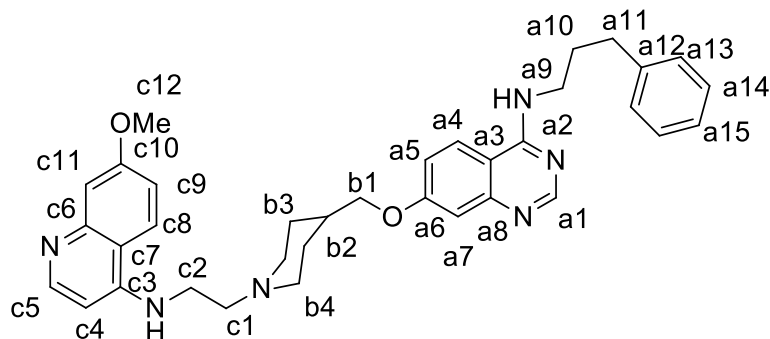

**<sup>1</sup>H NMR (500MHz, DMSO) δ** 8.38 (s, 1H, Ha1), 8.32 (d, *J*= 5.3Hz, 1H, Hc5), 8.15 (d, *J*=9.2Hz, 1H, Ha4), 8.10 (brt, *J*=5.4Hz, 1H, HNH), 8.06 (d, *J*=9.1Hz, 1H, Hc8), 7.32-7.22 (m, 4H, Ha13 and Ha14), 7.21-7.15 (m, 2H, Ha15 and Hc11), 7.11 (dd, *J*=2.4, 9.1Hz, 1H, Ha5), 7.08-7.03 (m, 2H, Ha7 and Hc9), 6.96 (brt, *J*=5.2Hz, 1H, HNH), 6.36 (d, *J*=5.5Hz, 1H, Hc4), 3.97 (d, *J*=5.7Hz, 2H, Hb1), 3.87 (s, 3H, Hc12), 3.53 (q, *J*=6.4Hz, 2H, Ha9), 3.41-3.36 (m, 2H, Hc2), 3.00 (brd, *J*=10.9Hz, 2H, Ha4eq), 2.68 (t, *J*=7.7Hz ; 2H, Ha11), 2.61 (t, *J*=6.9Hz, 2H, Hc1), 2.04 (t, *J*=11.1Hz, 2H, Hb4ax), 1.95 (quint, *J*=7.4Hz, Ha10), 1.85-1.73 (m, 3H, Hb3eq and Hb2), 1.44-1.31 (m, 2H, Hb3ax).

**<sup>13</sup>C NMR (125MHz, DMSO) δ** 162.1 (Ca6), 160.0 (Cc3), 159.5 (Ca2), 156.1 (Ca1), 151.8 (Ca8), 151.5 (Cc5), 150.6 (Cc10), 150.3 (Cc6), 142.2 (Ca12), 128.8 (Ca14), 128.7 (Ca13), 126.2 (Ca15), 124.7 (Ca4), 123.3 (Cc8), 117.2 (Ca5), 116.0 (Cc9), 113.7 (Cc7), 109.5 (Ca3), 108.3 (Cc11), 107.9 (Ca7), 97.6 (Cc4), 72.7 (Cb1), 56.7 (Cc1), 55.6 (Cc12), 53.5 (Cb4), 40.6 (Cc2), 40.5 (Ca9), 35.7 (Cb2), 33.1 (Ca11), 30.8 (Ca10), 29.0 (Cb3).

**HRMS-ESI (m/z)** calculated for C<sub>35</sub>H<sub>41</sub>N<sub>6</sub>O<sub>2</sub> [M+H]<sup>+</sup>: 577.3286; found: 577.3296.

**4-((3-phenylpropyl)amino)-7-((1-(2-(7-hydroxyquinolin-4-ylamino)ethyl) piperidin-4-yl)methoxy)quinazoline (47)**

**46** (6mg; 10.4 $\mu$ mol) was added to a solution of BBr<sub>3</sub> in DCM 0.5M (0.2mL) and one drop of dioxane. The mixture was stirred at room temperature overnight then quenched with water.

5 The solvent was removed and the residue was purified by reversed phase HPLC using a linear acetonitrile gradient with 0.01% of TEA (0 $\rightarrow$ 80% CH<sub>3</sub>CN) to afford **47** (5mg; 8.9 $\mu$ mol; yield 85%) as a white powder.

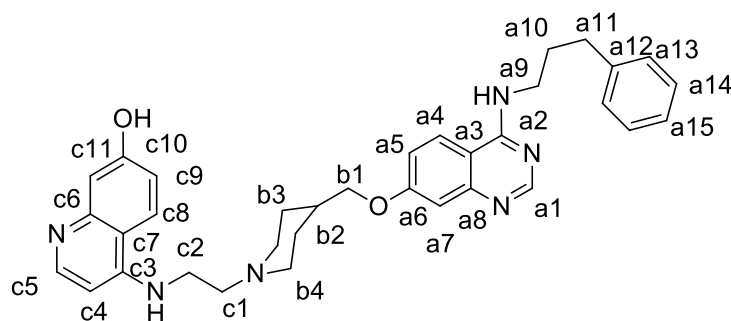

**<sup>1</sup>H NMR (500MHz, DMSO)  $\delta$**  8.38 (s, 1H, Ha1), 8.23 (d,  $J$ = 5.4Hz, 1H, Hc5), 8.15 (d,  $J$ =9.2Hz, 1H, Ha4), 8.10 (brt,  $J$ =5.4Hz, 1H, HNH), 7.94 (d,  $J$ =9.1Hz, 1H, Hc8), 7.32-7.22 (m, 4H, Ha13 and Ha14), 7.18 (t,  $J$ =7.2Hz, 1H, Ha15), 7.12 (dd,  $J$ =2.4, 9.0Hz, 1H, Ha5), 7.06 (d,  $J$ =2.5Hz, 1H, Ha7), 6.99 (d,  $J$ =2.25Hz, 1H, Hc11), 6.92 (dd,  $J$ =2.5, 9.0Hz, 1H, Hc9), 6.80 (brt,  $J$ =5.4Hz, 1H, HNH), 6.26 (d,  $J$ =5.4Hz, 1H, Hc4), 3.98 (d,  $J$ =5.9Hz, 2H, Hb1), 3.53 (q,  $J$ =6.6Hz, 2H, Ha9), 3.41-3.36 (m, 2H, Hc2), 3.00 (brd,  $J$ =11.3Hz, 2H, Ha4eq), 2.68 (t,  $J$ =7.7Hz ; 2H, Ha11), 2.61 (t,  $J$ =6.9Hz, 2H, Hc1), 2.05 (t,  $J$ =10.9Hz, 2H, Hb4ax), 1.95 (quint,  $J$ =7.4Hz, Ha10), 1.85-1.70 (m, 3H, Hb3eq and Hb2), 1.44-1.30 (m, 2H, Hb3ax).

**<sup>13</sup>C NMR (125MHz, DMSO)  $\delta$**  162.2 (Ca6), 159.8 (Cc10), 159.5 (Ca2), 156.1 (Ca1), 151.8 (Ca8), 151.1 (Cc5), 150.8 (Cc3), 150.3 (Cc6), 142.2 (Ca12), 128.8 (Ca14), 128.7 (Ca13), 126.2

(Ca15), 124.7 (Ca4), 123.0 (Cc8), 117.2 (Ca5), 116.5 (Cc9), 112.5 (Cc7), 111.0 (Cc11), 109.5 (Ca3), 107.9 (Ca7), 96.7 (Cc4), 72.7 (Cb1), 56.8 (Cc1), 53.5 (Cb4), 40.6 (Cc2), 40.4 (Ca9), 35.7 (Cb2), 33.2 (Ca11), 30.8 (Ca10), 29.0 (Cb3).

**HRMS-ESI (m/z)** calculated for C<sub>34</sub>H<sub>39</sub>N<sub>6</sub>O<sub>2</sub> [M+H]<sup>+</sup>: 536.3133 ; found: 536.3123.

5

**4-((3-phenylpropyl)amino)-7-((1-(2-(6,7-dimethoxyquinolin-4-ylamino)ethyl)piperidin-4-yl)methoxy)quinazoline (48)** (9 mg; 15 μmol; yield 56%) from **18** (10mg; 27μmol):

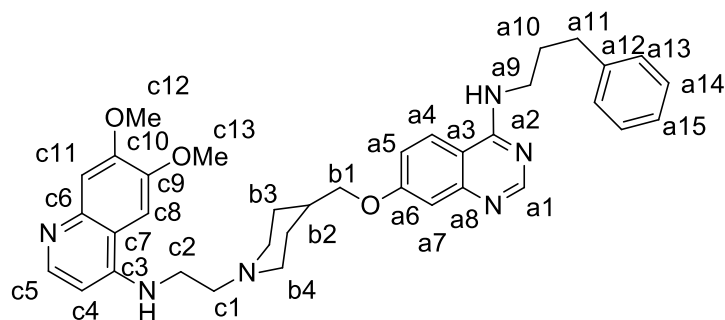

**<sup>1</sup>H NMR (500MHz, DMSO) δ** 8.37 (s, 1H, Ha1), 8.22 (d, *J*= 5.3Hz, 1H, Hc5), 8.15 (d, *J*=9.3Hz, 1H, Ha4), 8.11 (brt, *J*=5.4Hz, 1H, HNH), 7.45 (s, 1H, Hc8), 7.32-7.21 (m, 4H, Ha13 and Ha14), 7.21-7.15 (m, 2H, Ha15 and Hc11), 7.11 (dd, *J*=2.6, 9.1Hz, 1H, Ha5), 7.05 (d, *J*=2.6Hz, 2H, Ha7), 6.84 (brt, *J*=5.2Hz, 1H, HNH), 6.37 (d, *J*=5.5Hz, 1H, Hc4), 3.98 (d, *J*=5.9Hz, 2H, Hb1), 3.89 (s, 3H, Hc13), 3.87 (s, 3H, Hc12), 3.56-3.49 (m, 2H, Ha9), 3.41-3.36 (m, 2H, Hc2), 3.00 (brd, *J*=10.8Hz, 2H, Ha4eq), 2.68 (t, *J*=7.7Hz ; 2H, Ha11) 2.63 (t, *J*=6.9Hz, 2H, Hc1), 2.06 (t, *J*=10.8Hz, 2H, Hb4ax), 1.95 (quint, *J*=7.4Hz, Ha10), 1.86-1.75 (m, 3H, Hb3eq and Hb2), 1.47-1.32 (m, 2H, Hb3ax).

**<sup>13</sup>C NMR (125MHz, DMSO) δ** 162.1 (Ca6), 159.5(Ca2), 156.1 (Ca1), 151.7 (Cc3), 151.5 (Ca8), 149.3 (Cc9), 148.9 (Cc5), 148.0 (Cc10), 145.4 (Cc6), 142.2 (Ca12), 128.8 (Ca14), 128.7



(Ca13), 126.2 (Ca15), 124.7 (Ca4), 117.2 (Ca5), 113.1 (Cc7), 109.5 (Ca3), 108.7 (Cc11), 107.9 (Ca7), 101.1 (Cc8), 97.9 (Cc4), 72.7 (Cb1), 56.9 (Cc1), 56.3 (Cc13), 55.8 (Cc12), 53.6 (Cb4), 40.7 (Cc2), 40.3 (Ca9), 35.7 (Cb2), 33.1 (Ca11), 30.8 (Ca10), 29.0 (Cb3).

**HRMS-ESI (m/z)** calculated for C<sub>36</sub>H<sub>43</sub>N<sub>6</sub>O<sub>3</sub> [M+H]<sup>+</sup>: 607.3391; found: 607.3391.

5

**4-((3-phenylpropyl)amino)-7-((1-(2-(6,7-dihydroxyquinolin-4-ylamino)ethyl)piperidin-4-yl)methoxy)quinazoline (49)**

**48** (7mg; 12μmol) is added to a solution of BBr<sub>3</sub> in DCM 0.5M (0.2mL) and one drop of dioxane. The mixture was stirred at room temperature overnight. Then the mixture was  
10 quenched with water. The solvent was removed and the residue was purified by reversed phase HPLC using a linear acetonitrile gradient with 0.01% of TEA (0→80% CH<sub>3</sub>CN) to afford **49** (4mg; 6.9μmol; yield 58%) as a white powder.

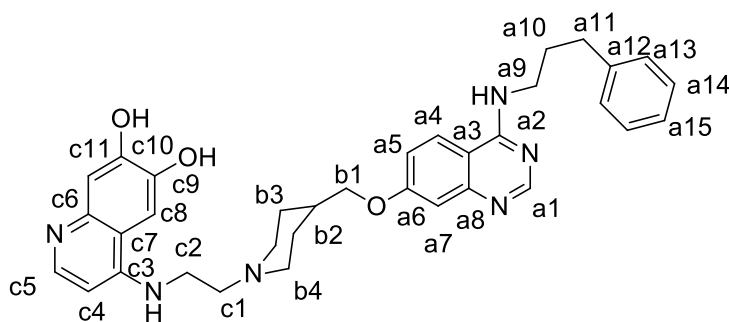

15 **<sup>1</sup>H NMR (500MHz, DMSO) δ** 8.37 (s, 1H, Ha1), 8.14 (d, *J*=9.1Hz, 1H, Ha4), 8.08 (brt, *J*=5.9Hz, 1H, HNH), 7.95 (m, 1H, Hc5), 7.30-7.310 (m, 5H, Hc?, Ha13 and Ha14), 7.19-7.151 (m, 1H, Ha15), 7.10 (dd, *J*=2.6, 8.8Hz, 1H, Ha5), 7.04 (d, *J*=2.6Hz, 1H, Ha7), 6.26 (d, *J*=6.3Hz, 1H, Hc4), 3.97 (d, *J*=5.9Hz, 2H, Hb1), 3.52 (brq, *J*=6.2Hz, 2H, Ha9), 3.38 (brq,

$J=3.8\text{Hz}$ , 2H, Hc2), 2.98 (brd,  $J=11.1\text{Hz}$ , 2H, Ha4eq), 2.67 (t,  $J=7.7\text{Hz}$ ; 2H, Ha11), 2.59 (t,  $J=6.8\text{Hz}$ , 2H, Hc1), 2.06 (t,  $J=10.5\text{Hz}$ , 2H, Hb4ax), 1.93 (quint,  $J=7.6\text{Hz}$ , Ha10), 1.83-1.73 (m, 3H, Hb3eq and Hb2), 1.42-1.29 (m, 2H, Hb3ax).

**$^{13}\text{C}$  NMR (125MHz, DMSO)  $\delta$**  161.7 (Ca6), 159.1(Ca2), 155.6 (Ca1), 151.3 (Ca8), 141.8 (Ca12), 128.3 (Ca14 and Ca13), 125.7 (Ca15), 124.3 (Ca4), 116.7 (Ca5), 109.1 (Ca3), 107.5 (Ca7), 95.7 (Cc4, observed by HSQC), 72.2 (Cb1), 56.5 (Cc1), 53.0 (Cb4), 40.4 (Cc2), 40.2 (Ca9), 35.3 (Cb2), 32.7 (Ca11), 30.4 (Ca10), 28.6 (Cb3).

NMR signals of Hc11, Hc8, Cc3, Cc5, Cc6, Cc7, Cc8Cc9, Cc10, Cc11 were not observed, presence of the dihydroxyquinoline moiety was confirmed by HRMS and by the presence of the characteristic Hc4 signal and the Hc5 signal as well as by the presence of their correlation on COSY spectra and the presence of a correlation of Hc4 and Cc4 on HSQC spectra.

**HRMS-ESI (m/z)** calculated for  $\text{C}_{34}\text{H}_{39}\text{N}_6\text{O}_3$   $[\text{M}+\text{H}]^+$ : 579.3078; found: 579.3081.

**4-(3-phenylpropylamino)-7-((1-(2-((6-fluoroquinolin-4-yl)amino)ethyl)piperidin-4-yl)methoxy)- quinazoline 50** (16mg; 28 $\mu\text{mol}$ ; yield 71%) as a white powder from **18** (15mg; 40 $\mu\text{mol}$ ).

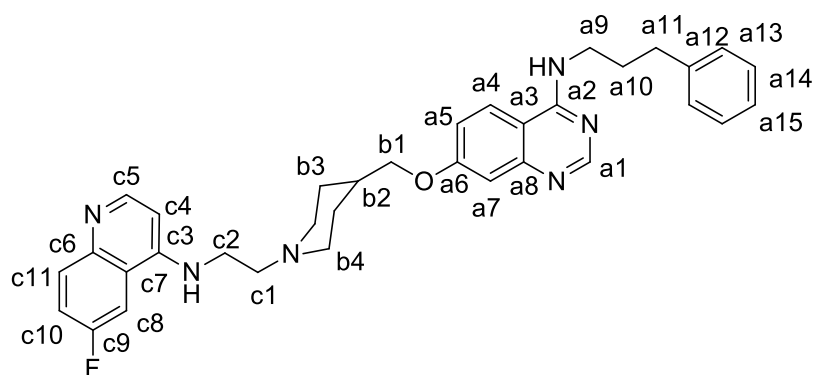

**<sup>1</sup>H NMR (500MHz, DMSO) δ** 8.38 (d, *J*=5.3Hz, 1H, Hc5), 8.37 (s, 1H, Ha1), 8.15 (d, *J*=9.0Hz, 1H, Ha4), 8.09 (t, *J*=5.4Hz, 1H, HNHa), 8.02 (dd, *J*=2.8, 11.1Hz, 1H, Hc8), 7.83 (dd, *J*=5.9, 9.2Hz, 1H, Hc11), 7.51 (ddd, *J*=2.9, 8.2, 9.1Hz, 1H, Hc10), 7.28 (m, 2H, Ha14), 7.23 (m, 2H, Ha13), 7.17 (t, *J*=1.5, 7.1Hz, 1H, Ha15), 7.10 (dd, *J*=2.6, 9.1Hz, 1H, Ha5), 7.04 (d, *J*=2.6Hz, 1H, Ha7), 6.99 (brt, *J*=5.3Hz, 1H, HNHC), 6.50 (d, *J*=5.4Hz, 1H, Hc4), 3.97 (d, *J*=5.9Hz, 2H, Hb1), 3.51 (q, *J*=6.0Hz, 2H, Ha9), 3.40 (q, *J*=6.6Hz, 2H, Hc2), 3.00 (brd, *J*=11.2Hz, 2H, Ha4eq), 2.67 (t, *J*=7.6Hz, 2H, Ha11), 2.62 (t, *J*=7.2Hz, 2H, Hc1), 2.04 (brt, *J*=10.7Hz, 2H, Hb4ax), 1.94 (quint, *J*=7.4Hz, Ha10), 1.78 (m, 3H, Hb3eq, Hb2), 1.37 (dq, *J*=2.5, 12.4Hz, 2H, Hb3ax).

**<sup>13</sup>C NMR (125MHz, DMSO) δ** 161.7 (Ca6), 159.5 (Ca2), 158.8 (d, *J*=243.5Hz, Cc9), 155.6 (Ca1), 151.4 (Ca8), 150.3 (d, *J*=2.0Hz, Cc5), 149.6 (d, *J*=4.5Hz, Cc3), 145.7 (Cc6), 141.8 (Ca12), 131.7 (d, *J*=9.4Hz, Cc11), 128.3 (Ca13, Ca14), 125.7 (Ca15), 124.3 (Ca4), 119.2 (d, *J*=8.8Hz, Cc7), 118.2 (d, *J*=25.3Hz, Cc10), 116.7 (Ca5), 109.1 (Ca3), 107.5 (Ca7), 105.6 (d, *J*=23.1Hz, Cc8), 98.5 (Cc4), 72.2 (Cb1), 56.2 (Cc1), 53.1 (Cb4), 40.3 (Cc2), 40.1 (Ca9), 35.2 (Cb2), 32.7 (Ca11), 30.4 (Ca10), 28.6 (Cb3).

**HRMS-ESI (m/z)** calculated for C<sub>35</sub>H<sub>38</sub>FN<sub>6</sub>O [M+H]<sup>+</sup>: 565.3086; found: 565.3097.

**4-((3-phenylpropyl)amino)-7-((1-(2-(methyl(quinolin-4-yl)amino)ethyl) piperidin-4-yl)methoxy)quinazoline (51)** (13mg; 23 $\mu$ mol; yield 85%) from **18** (10mg; 27 $\mu$ mol):

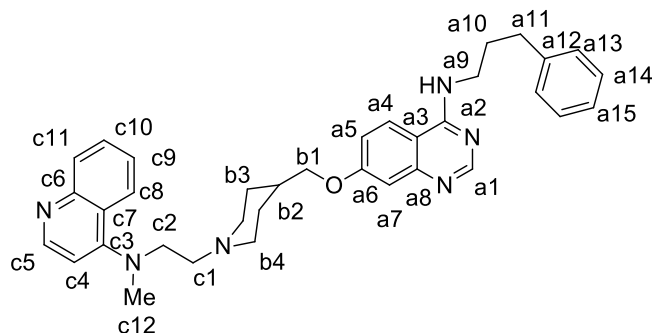

**<sup>1</sup>H NMR (500MHz, DMSO)  $\delta$**  8.61 (d,  $J$ = 5.1Hz, 1H, Hc5), 8.38 (s, 1H, Ha1), 8.21 (d,  $J$ =8.5Hz, 1H, Hc8), 8.15 (d,  $J$ =9.2Hz, 1H, Ha4), 8.09 (brt,  $J$ =5.4 Hz, 1H, HNH), 7.91 (dd,  $J$ =0.7,8.3Hz, 1H, Hc11), 7.66 (t,  $J$ =7.3Hz, 1H, Hc9), 7.51(t,  $J$ =7.3Hz, 1H, Hc10), 7.32-7.22 (m, 4H, Ha13 and Ha14), 7.18 (t,  $J$ =7.3Hz, 1H, Ha15), 7.10 (dd,  $J$ =2.5, 9.1Hz, 1H, Ha5), 7.04 (d,  $J$ =2.6Hz, 1H, Ha7), 6.93 (d,  $J$ =5.4Hz, H1, Hc4), 3.93 (d,  $J$ =5.9Hz, 2H, Hb1), 3.53 (q,  $J$ =5.8Hz, 2H, Ha9), 3.40 (t,  $J$ =6.3Hz, 2H, Hc2), 2.97 (s, 3H, Hc12), 2.85 (brd,  $J$ =10.7Hz, 2H, Ha4eq), 2.68 (t,  $J$ =7.7Hz, 2H, Ha11,) 2.64 (t,  $J$ =6.2Hz, 2H, Hc1,), 2.02-1.88 (m, 4H, Hb4ax and Ha10), 1.79-1.63 (m, 3H, Hb3eq and Hb2), 1.29-1.15 (m, 2H, Hb3ax).

**<sup>13</sup>C NMR (125MHz, DMSO)  $\delta$**  162.1 (Ca6), 159.5 (Ca2), 157.1 (Cc3), 156.1 (Ca1), 151.8 (Ca8), 150.8 (Cc5), 149.8 (Cc6), 142.2(Ca12), 129.9 (Cc11), 129.1 (Cc10), 128.8 (Ca14), 128.7 (Ca13), 126.2 (Ca15), 124.9 (Cc9), 124.7 (Ca4), 124.6 (Cc8), 123.1 (Cc7), 117.1 (Ca5), 109.5 (Ca3), 108.8 (Cc4), 107.9 (Ca7), 72.6 (Cb1), 55.9 (Cc1), 54.2 (cc2), 53.6 (Cb4), 40.5 (Ca9), 40.2 (Cc12), 35.6 (Cb2), 33.1 (Ca11), 30.8 (Ca10), 29.0 (Cb3).

**HRMS-ESI (m/z)** calculated for C<sub>35</sub>H<sub>41</sub>N<sub>6</sub>O [M+H]<sup>+</sup>: 561.3337; found: 561.3339.

**Procedures for compounds 53 and 54.**

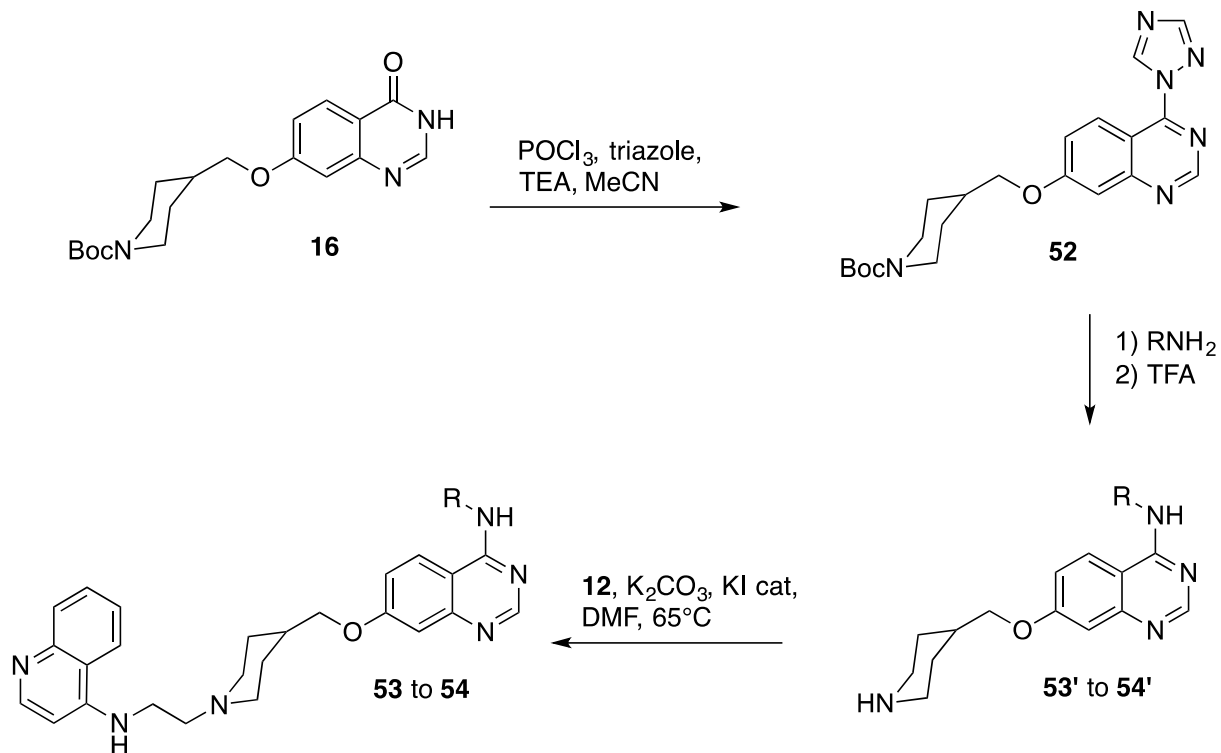

**4-(1H-1,2,4-triazol-1-yl)-7-(O-((N-Boc)piperidin-4-ylmethoxy))quinazoline (**52**)**

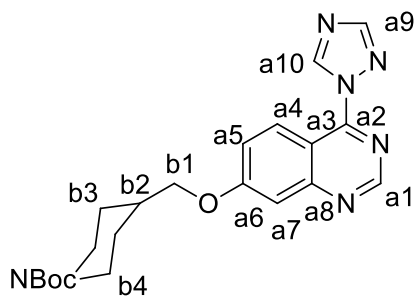

5

To a solution of triazole (280mg; 4mmol) and  $\text{POCl}_3$  (120 $\mu\text{L}$ ; 1.32mmol) in 3mL of acetonitrile at  $0^\circ\text{C}$  was added TEA (560 $\mu\text{L}$ ) dropwise. The reaction mixture was stirred at  $0^\circ\text{C}$  for 40min then 30min at room temperature. **16** (215mg; 0.6mmol) was added and the mixture

was vigorously stirred at room temperature overnight. The reaction was followed by TLC using ethyl acetate as eluent. After complete consumption of the starting material, the solvent was removed. The residue was taken off with ethyl acetate and washed with water and brine, and dried over sodium sulfate. The solvent was removed to afford **52** as a yellow powder (241mg; 0.59mmol; yield 98%).

**<sup>1</sup>H NMR (500MHz, CDCl<sub>3</sub>)**  $\delta$  9.42 (s, 1H, Ha1), 9.25 (d,  $J$ =9.6Hz, 1H, Ha4), 9.06 (s, 1H, Ha9), 8.28 (s, 1H, Ha10), 7.38-7.33 (m, 2H, Ha5 and Ha7), 4.22 (brs, 2H, Hb4eq), 4.05 (d,  $J$ =6.3Hz, 2H, Hb1), 2.81 (brt,  $J$ =13Hz, 2H, Hb4ax), 2.09 (quint,  $J$ =7.3Hz, 2H, Ha10), 2.11 (m, 1H, Hb2), 1.89 (d,  $J$ =13.0Hz, 2H, Hb3eq), 1.49 (s, 9H, HBoc), 1.36 (dq,  $J$ =4.2, 13.0Hz, 2H, Hb3ax).

**<sup>13</sup>C NMR (125MHz, CDCl<sub>3</sub>)**  $\delta$  163.8 (Ca6), 156.2 (Ca2), 154.8 (CBoc), 154.0 (Ca9), 153.9 (Ca10), 152.4 (Ca8), 144.9 (Ca1), 128.2 (Ca4), 122.1 (Ca5), 111.0 (Ca3), 107.0 (Ca7), 79.5 (CBoc), 72.8 (Cb1), 43.6 (Cb4), 35.9 (Cb2), 28.8 (Cb3), 28.4 (CBoc).

**HRMS-ESI(m/z)** calculated for C<sub>21</sub>H<sub>26</sub>N<sub>6</sub>O<sub>3</sub>Na [M+Na]<sup>+</sup>: 433.1959; found: 433.1960.

#### 4-(2-phenethylamino)-7-(piperidin-4-ylmethoxy)quinazoline (**53'**)

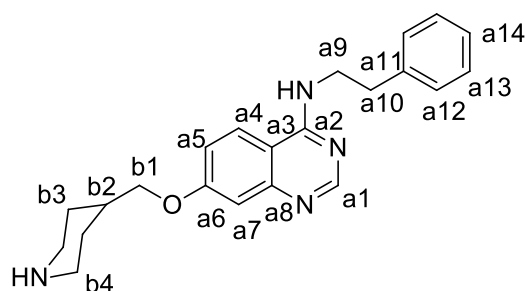

To a solution of the intermediate triazolyl **52** (68mg; 0.16mmol) in DMF was added phenethylamine (23μL; 0.16mmol). The mixture was stirred at 60°C overnight. Ethyl acetate was added and the organic phase was washed with a 10% citric acid solution, water and brine then dried over sodium sulfate. The solvent was removed. The residue was solubilized in TFA and the mixture was stirred for 1.5h at room temperature. TFA was removed and the residue was purified by reversed phase HPLC using a linear acetonitrile gradient with 0.01% of TEA (0→80% CH<sub>3</sub>CN) to afford **53'** as a white powder (37mg; 0.10mmol; yield 64%).

**<sup>1</sup>H NMR (DMSO) δ** 8.41 (s, 1H, Ha1), 8.20 (brt, *J*=5.2Hz, 1H, HNH), 8.10 (d, *J*=9.2Hz, 1H, Ha4), 7.33-7.13 (m, 4H, Ha12 and Ha13), 7.20 (m, 1H, Ha14), 7.10 (dd, *J*=2.5, 9.0Hz, 1H, Ha5), 7.05 (d, *J*=2.5Hz, 1H, Ha7), 3.93 (d, *J*=6.4Hz, 2H, Hb1), 3.72 (m, 2H, Ha9), 3.00-2.93 (m, 4H, Hb4eq and Ha10), 2.48 (m, 2H, Hb4ax), 1.86 (m, 1H, Hb2), 1.95 (brd, *J*=12.0Hz, 2H, Hb3eq), 1.19 (dq, *J*=4.0, 12.0Hz, 2H, Hb3ax).

**<sup>13</sup>C NMR (DMSO) δ** 162.2 (Ca6), 159.4 (Ca2), 156.1 (Ca1), 152.8 (Ca8), 140.0 (Ca11), 129.1 (Ca12), 128.8 (Ca13), 126.5 (Ca4), 124.6 (Ca14), 117.3 (Ca5), 109.5 (Ca3), 107.9 (Ca7), 73.2 (Cb1), 46.2 (Cb4), 42.6 (Ca9), 36.4 (Cb2), 35.1 (Ca10), 30.1 (Cb3).

**HRMS-ESI(m/z)** calculated for C<sub>22</sub>H<sub>27</sub>N<sub>4</sub>O [M+H]<sup>+</sup>: 363.2179; found: 363.2161.

**4-(3-phenethylamino)-7-((1-(2-(quinolin-4-ylamino)ethyl)piperidin-4-yl)methoxy)quinazoline (53)**

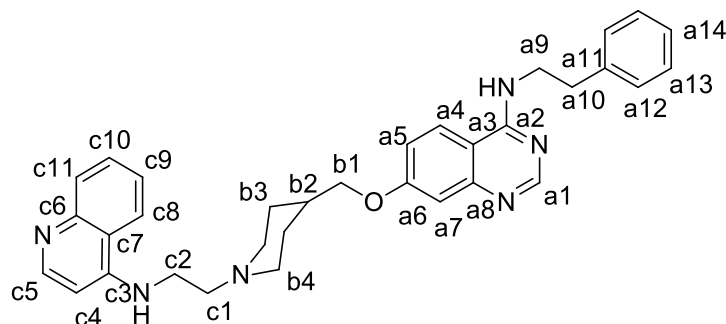

To a solution of **53'** (30mg; 0.08mmol), K<sub>2</sub>CO<sub>3</sub> (23mg; 0.16mmol) and a catalytic amount  
of KI in DMF (1.5mL) was added **12** (40mg; 0.16mmol). The mixture was stirred at 65°C  
overnight. The solvent was removed and the residue was purified by reversed phase HPLC  
using a linear acetonitrile gradient with 0.01% of TEA (0→80% CH<sub>3</sub>CN) to afford **53** as a  
white powder (28mg; 0.05mmol; yield 64%).

**<sup>1</sup>H NMR (500MHz, CDCl<sub>3</sub>)** δ 8.64 (s, 1H, Ha1), 8.59 (d, *J*=5.6Hz, 1H, Hc5), 8.04 (d,  
10 *J*=8.2Hz, 1H, Hc8), 7.80 (d, *J*=0.7, 8.4Hz, 1H, Hc11), 7.68 (ddd, *J*=1.3, 6.9, 8.3Hz, 1H, Hc10),  
7.51 (ddd, *J*=1.1, 6.7, 8.3Hz, 1H, Hc9), 7.44 (d, *J*=9.28Hz, 1H, Ha4), 7.38-7.33 (m, 2H, Ha12),  
7.31-7.26 (m, 3H, Ha14 and Ha13), 7.18 (d, *J*=2.6Hz, 1H, Ha7), 7.05 (dd, *J*=2.6, 9.0Hz, 1H,  
Ha5), 6.43 (d, *J*=5.4Hz, 1H, Hc4), 6.15 (brs, 1H, HNHc), 5.60 (brt, *J*=5.7Hz, 1H, HNHa), 4.00  
(d, *J*=6.2Hz, 2H, Hb1), 3.70 (dd, *J*=6.7, 12.2Hz, 2H, Ha9), 3.38 (q, *J*=5.2Hz, 2H, Hc2), 3.08-  
15 3.00 (m, 4H, Hb4eq and Hc1), 2.83 (t, *J*=6.2Hz, Ha10), 2.18 (dt, *J*=1.3, 11.6Hz, 2H, Hb4ax),  
2.09-1.89 (m, 3H, Hb2 and Hb3eq), 1.47 (dq, *J*=3.0,12.5Hz, 2H, Hb3ax).

**<sup>13</sup>C NMR (125MHz, CDCl<sub>3</sub>)** δ 162.2 (Ca6), 159.0 (Ca2), 156.0 (Ca1), 151.7 (Ca8), 150.3  
(Cc5), 150.2 (Cc3), 147.5 (Cc6), 138.9 (Ca12), 129.4 (Cc8), 129.1 (Cc10), 128.9 (Ca12), 128.8



(Ca13), 126.6 (Ca14), 124.9 (Cc9), 121.8 (Ca4), 119.5 (Cc11), 118.7 (Cc7), 118.1 (Ca5), 109.2 (Ca3), 107.9 (Ca7), 98.8 (Cc4), 72.6 (Cb1), 55.8 (Cc1), 52.9 (Cb4), 42.1 (Ca9), 39.1 (Cc2), 35.6 (Cb2), 35.3 (Ca10), 29.2 (Cb3).

**HRMS-ESI(m/z)** calculated for  $C_{33}H_{37}N_6O$   $[M+H]^+$ : 533.3023; found: 533.3023.

5

**4-(2-benzylamino)-7-(piperidin-4-ylmethoxy)quinazoline (54')**

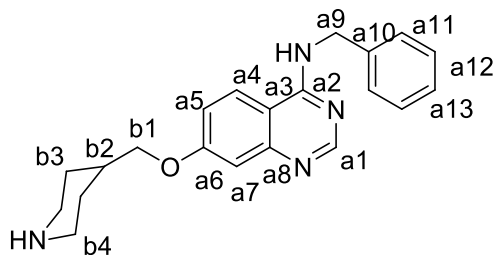

To a solution of the intermediate triazolyl **51** (120mg; 0.29mmol) and TEA (29 $\mu$ L) in DMF  
 10 was added benzylamine (36 $\mu$ L; 0.32mmol). The mixture was stirred at 90°C overnight. Ethyl  
 acetate was added and the organic phase was washed with a 10% citric acid solution, water and  
 brine then dried over sodium sulfate. The solvent was removed. The residue was solubilized in  
 TFA and the mixture was stirred for 1.5 at room temperature. TFA was removed and the  
 residue was purified by reversed phase HPLC using a linear acetonitrile gradient with 0.01% of  
 15 TEA (0 $\rightarrow$ 80%  $CH_3CN$ ) to afford **53'** as a white powder (50mg; 0.14mmol; yield 50%).

**$^1H$  NMR (500MHz, DMSO)**  $\delta$  8.67 (brt, 1H,  $J$ =6.1Hz, HNH), 8.37 (s, 1H, Ha1), 8.21 (d,  $J$ =9.2Hz, 1H, Ha4), 7.38-7.18 (m, 5H, Ha11, Ha12 and Ha13), 7.13 (dd,  $J$ =2.1, 9.1Hz, 1H, Ha5), 7.05 (d,  $J$ =2.0Hz, 1H, Ha7), 4.76 (d, 2H,  $J$ =5.7Hz, Ha9), 4.24 (d,  $J$ =7.4Hz, 2H, Hb1),

4.13-3.93 (m, 2H, Hb4eq), 3.17 (m, 2H, Hb4ax), 2.73 (m, 1H, Hb2), 1.77 (brd,  $J=12.2\text{Hz}$ , 2H, Hb3eq), 1.22 (m, 2H, Hb3ax).

**$^{13}\text{C}$  NMR (125MHz, DMSO)  $\delta$**  162.8 (Ca6), 158.8 (Ca2), 158.0 (Ca1), 152.8 (Ca8), 141.8 (Ca10), 128.7 (Ca11), 128.1 (Ca13), 127.5 (Ca12), 126.9 (Ca4), 116.4 (Ca5), 109.0 (Ca3),  
5 105.2 (Ca7), 72.7 (Cb1), 44.0 (Cb4), 43.8 (Ca9), 35.9 (Cb2), 28.9 (Cb3).

**HRMS-ESI(m/z)** calculated for  $\text{C}_{22}\text{H}_{27}\text{N}_4\text{O}$   $[\text{M}+\text{H}]^+$ : 349.2023; found: 349.2001.

**4-(3-benzylamino)-7-((1-(2-(quinolin-4-ylamino)ethyl)piperidin-4-yl)methoxy)quinazoline (54)**

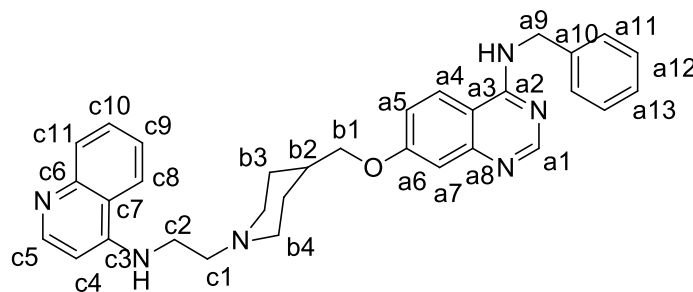

10

To a solution of **54'** (30mg; 0.086mmol),  $\text{K}_2\text{CO}_3$  (24mg; 172 $\mu\text{mol}$ ) and a catalytic amount of KI in DMF (1.5mL) was added **12** (42mg; 0.172mmol). The mixture was stirred at 65°C overnight. The solvent was removed and the residue was purified by reversed phase HPLC using a linear acetonitrile gradient with 0.01% of TEA (0 $\rightarrow$ 80%  $\text{CH}_3\text{CN}$ ) to afford **53** as a  
15 white powder (30mg; 58 $\mu\text{mol}$ ; yield 68%).

**$^1\text{H}$  NMR (500MHz,  $\text{CDCl}_3$ )  $\delta$**  8.66 (s, 1H, Ha1), 8.58 (d,  $J=5.1\text{Hz}$ , 1H, Hc5), 8.00 (dd,  $J=0.7$ , 8.5Hz, 1H, Hc8), 7.79 (dd,  $J=0.7$ , 8.5Hz, 1H, Hc11), 7.61 (d,  $J=8.9\text{Hz}$ , 1H, Ha4), 7.66 (ddd,  $J=1.4$ , 6.8, 8.3Hz, 1H, Hc10), 7.48 (ddd,  $J=1.4$ , 6.8, 8.3Hz, 1H, Hc9), 7.45-7.32 (m, 5H,

Ha11 and Ha12 and Ha13), 7.20 (d,  $J=2.4$ Hz, 1H, Ha7), 7.08 (dd,  $J=2.4$ , 1H, 9.1Hz, Ha5), 6.42 (d,  $J=5.3$ Hz, 1H, Hc4), 5.96 (brt,  $J=4.1$ , 1H, HNHc), 5.87(m, 1H, HNH<sub>a</sub>), 4.87 (d,  $J=5.2$ Hz, Ha9), 4.00 (d,  $J=6.1$ Hz, 2H, Hb1), 3.36 (q,  $J=5.2$ Hz, 2H, Hc2), 3.03 (brd,  $J=11.7$ Hz, 2H, Hb4eq), 2.81 (t,  $J=6.0$ Hz, 2H, Ha11), 2.16 (dt,  $J=1.2$ , 11.8Hz, 2H, Hb4ax), 2.01-1.89 (m, 3H, Hb2 and Hb3eq), 1.50 (dq,  $J=3.6$ -12.1Hz, 2H, Hb3ax).

**$^{13}\text{C}$  NMR (125MHz,  $\text{CDCl}_3$ )  $\delta$**  162.3 (Ca6), 158.9 (Ca2), 156.0 (Ca1), 151.8 (Ca8), 151.1 (Cc5), 149.8 (Cc3), 148.3 (Cc6), 138.2 (Ca10), 129.8 (Cc8), 129.0 (Cc10), 128.8 (Ca12), 128.0 (Ca11), 127.8 (Ca13), 124.6 (Cc9), 122.0 (Ca4), 119.5 (Cc11), 118.9 (Cc7), 118.1 (Ca5), 109.0 (Ca3), 107.9 (Ca7), 99.0 (Cc4), 72.7 (Cb1), 55.9(Cc1), 52.9 (Cb4), 45.3 (Ca9), 39.2 (Cc2), 35.7 (Cb2), 29.2 (Cb3).

**HRMS-ESI( $m/z$ )** calculated for  $\text{C}_{32}\text{H}_{35}\text{N}_6\text{O}$  [ $\text{M}+\text{H}$ ] $^+$ : 519.2867; Found: 519.2870.

15

20

**General procedure for compounds 55 to 70.**

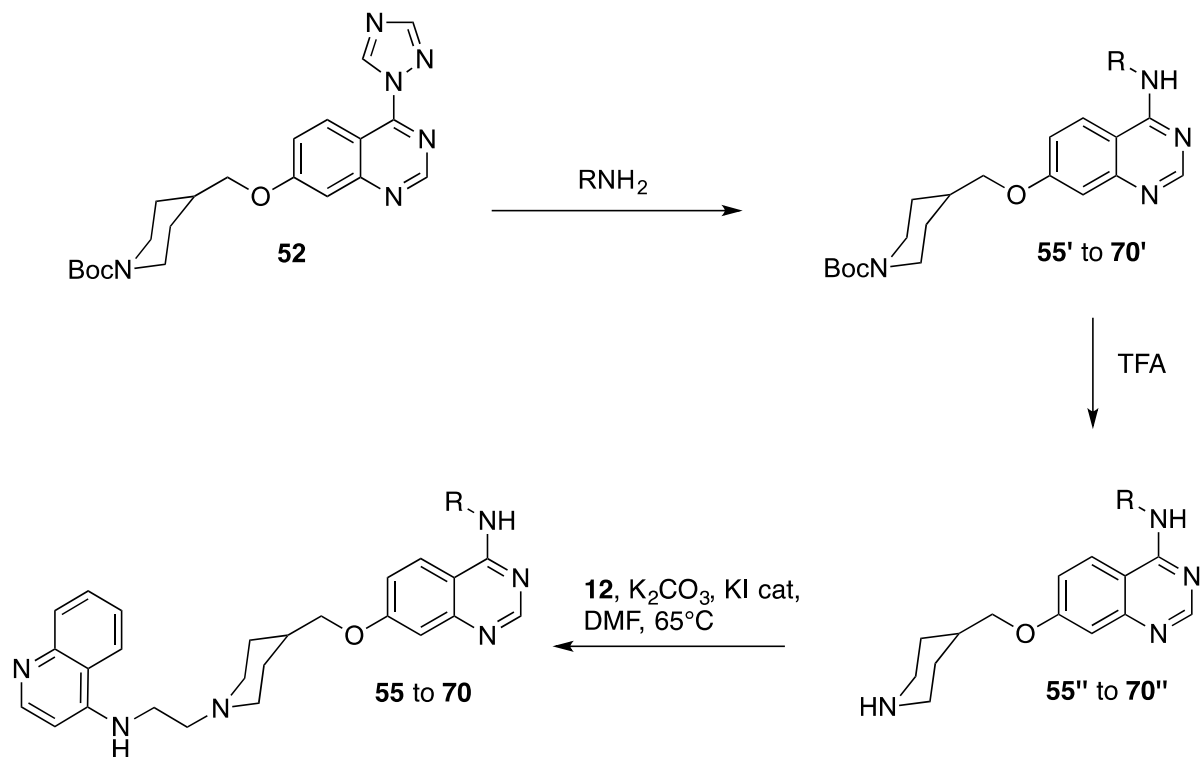

**Step 1:**

To a solution of **52** was solubilized in DMF (0.5mL), the desired amine (3eq) and TEA  
5 (6eq) were added and the mixture was stirred for 6h at room temperature. The reaction was followed by TLC and if starting material **52** was not completely disappeared the reaction mixture was stirred at  $65^\circ\text{C}$  for 3 more hours. The mixture was diluted with ethyl acetate and washed with water, brine and dried over sodium sulfate. The solvent was removed and the residue was purified by silica gel flash chromatography using a linear gradient of ethyl acetate  
10 (0  $\rightarrow$  100% EtOAc) in cyclohexane to afford **55'** to **70'**.

**Step 2:**

A mixture of the desired compound **55'** to **70'** in TFA was stirred for 1h at room temperature. TFA was removed. The residue was diluted with dichloromethane and the organic

phase was washed with saturated Na<sub>2</sub>CO<sub>3</sub>. The solvent was removed and gave respectively compound **55''** to **70''**.

Step 3:

To a solution of 0.1 M of compound **55''** to **70''** K<sub>2</sub>CO<sub>3</sub> (2eq) and a catalytic amount of KI  
5 in DMF was added **12** (2eq). The mixture was stirred at 65°C overnight then was diluted with ethyl acetate. The organic phase was washed with water and brine and dried over sodium sulfate. The solvent was removed and the residue was purified by silica gel flash chromatography using a linear gradient of ammonia 1N in methanol (0→10% MeOH/NH<sub>3</sub>) in dichloromethane or by reversed phase HPLC using a linear acetonitrile gradient with 0.01% of  
10 TEA (0→80% CH<sub>3</sub>CN) to afford compounds **55** to **70**.

**4-propylamino-7-(O-((N-Boc)piperidin-4-ylmethoxy))quinazoline (55')** (42mg; 105μmol; yield 75%) from **52** (53mg; 140μmol).

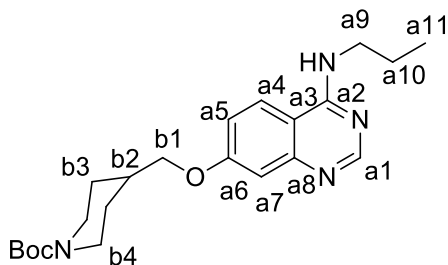

15 <sup>1</sup>H NMR (500MHz, CDCl<sub>3</sub>) δ 8.58 (s, 1H, Ha1), 7.59 (d, J=9.0Hz, 1H, Ha4), 7.12 (d, J=3.2Hz, 1H, Ha7), 7.04 (dd, J=2.4, 9.0Hz, 1H, Ha5), 5.62(brt, J=4.8, 1H, HNH), 4.15 (brs, 2H, Hb4eq), 3.92 (d, J=6.4Hz, 2H, Hb1), 3.60 (m, 2H, Ha9), 2.75 (m, 2H, Hb4ax), 2.00 (m, 1H, Hb2), 1.82 (d, J=10.9Hz, 2H, Hb3eq), 1.74 (sext, J=7.5Hz, 2H, Ha10), 1.46 (s, 9H, HBoc), 1.30 (m, 2H, Hb3ax), 1.03 (t, J=6.7Hz, 3H, Ha11).

**$^{13}\text{C}$  NMR (125MHz,  $\text{CDCl}_3$ )  $\delta$**  162.1 (Ca6), 159.2 (Ca2), 156.0 (Ca1), 154.8 (CBoc), 151.6 (Ca8), 121.9 (Ca4), 117.9 (Ca5), 109.1 (Ca3), 107.9 (Ca7), 79.4 (CBoc), 72.4 (Cb1), 43.0 (Cb4), 43.0 (Ca9), 35.9 (Cb2), 28.8 (Cb3), 28.4 (CBoc), 22.7 (Ca10), 11.5 (Ca11).

**HRMS-ESI(m/z)** calculated for  $\text{C}_{22}\text{H}_{33}\text{N}_4\text{O}_3$   $[\text{M}+\text{H}]^+$ : 401.2547 ; found: 401.2538.

5

**4-propylamino-7-O-(piperidin-4-ylmethoxy)quinazoline (55'')** (28mg, 93 $\mu\text{mol}$ , yield 90%) from **55'** (42mg, 105 $\mu\text{mol}$ ).

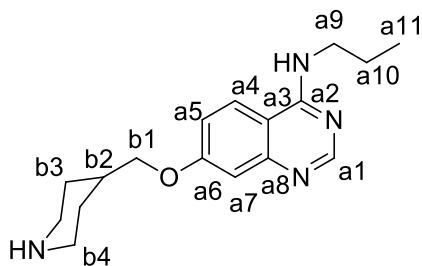

10  **$^1\text{H}$  NMR (500MHz, DMSO)  $\delta$**  8.37 (s, 1H, Ha1), 8.14 (d,  $J=9.0\text{Hz}$ , 1H, Ha4), 8.08 (brt,  $J=5.3\text{Hz}$ , 1H, HNH), 7.09 (dd,  $J=2.4, 9.0\text{Hz}$ , 1H, Ha5), 7.04 (d,  $J=2.5\text{Hz}$ , 1H, Ha7), 3.93 (d,  $J=6.2\text{Hz}$ , 2H, Hb1), 3.60 (d,  $J=5.9\text{Hz}$ , 2H, Ha9), 2.95 (brd,  $J=12.1\text{Hz}$ , 2H, Hb4eq), 2.46 (m, 2H, Hb4ax), 1.86 (m, 1H, Hb2), 1.71 (brd,  $J=10.7\text{Hz}$ , 2H, Hb3eq), 1.64 (sext,  $J=7.2\text{Hz}$ , 2H, Ha10), 1.18 (dq,  $J=3.9, 12.5\text{Hz}$ , 2H, Hb3ax), 0.93 (t,  $J=5.7\text{Hz}$ , 3H, Ha11).

15  **$^{13}\text{C}$  NMR (125MHz, DMSO)  $\delta$**  162.2 (Ca6), 159.5 (Ca2), 156.1 (Ca1), 151.8 (Ca8), 124.7 (Ca4), 117.1 (Ca5), 109.5 (Ca3), 107.9 (Ca7), 73.2 (Cb1), 46.2 (Cb4), 42.6 (Ca9), 36.4 (Cb2), 30.2 (Cb3), 22.4 (Ca10), 11.9 (Ca11).

**HRMS-ESI(m/z)** calculated for  $\text{C}_{17}\text{H}_{25}\text{N}_4\text{O}$   $[\text{M}+\text{H}]^+$ : 301.2023; found: 301.2026.

**4-propylamino-7-((1-(2-(quinolin-4-ylamino)ethyl)piperidin-4-yl)methoxy)quinazoline**

(**55**) (12.0mg; 26μmol; yield 78%) from **55''** (10mg; 33μmol),

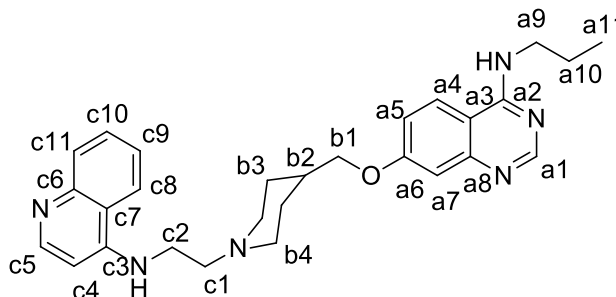

5 **<sup>1</sup>H NMR (500MHz, DMSO) δ** 8.39 (d, *J*=5.3Hz, 1H, Hc5), 8.37 (s, 1H, Ha1), 8.17-8.11 (m, 2H, Ha4 and Hc8), 8.07 (brt, *J*=5.3Hz, 1H, HNH), 7.77 (dd, *J*=1.1, 8.4Hz, 1H, Hc11), 7.60 (ddd, *J*=1.3, 6.9, 8.2Hz, 1H, Hc10), 7.41 (ddd, *J*=1.3, 6.9, 8.2Hz, 1H, Hc9), 7.09 (dd, *J*=2.5, 9.0Hz, 1H, Ha5), 7.04 (m, 1H, Ha7), 6.47 (d, *J*=5.8Hz, 1H, Hc4), 3.96 (d, *J*=5.85Hz, 2H, Hb1), 3.45 (q, *J*=5.8Hz, 2H, Ha9), 3.40 (q, *J*=6.2Hz, 2H, Hc2), 3.00 (brd, *J*=10.1Hz, 2H, Hb4eq), 2.62 (t, *J*=7.1Hz, 2H, Hc1), 2.04 (t, *J*=10.1Hz, 2H, Hb4ax), 1.91 (m, 3H, Hb3eq and Hb2), 1.63 (sext, *J*=7.4Hz, 2H, Ha10), 1.36 (dq, *J*=3.0, 12.6Hz, 2H, Hb3ax), 0.91 (t, *J*=7.3Hz, 3H, Ha11)

**<sup>13</sup>C NMR (125MHz, DMSO) δ** 162.1 (Ca6), 159.5 (Ca2), 156.1 (Ca1), 151.8 (Ca8), 151.2 (Cc5), 150.2 (Cc3), 148.2 (Cc6), 129.5 (Cc11), 129.1 (Cc10), 124.7 (Ca4), 124.3 (Cc9), 121.9 (Cc8), 119.2 (Cc7), 117.1 (Ca5), 109.5 (Ca3), 107.9 (Ca7), 98.7 (Cc4), 72.7 (Cb1), 56.6 (Cc1), 53.5 (Cb4), 42.6 (Ca9), 40.6 (Cc2), 35.7 (Cb2), 29.0 (Cb3), 22.4 (Ca10), 11.9 (Ca11).

**HRMS-ESI(m/z)** calculated for C<sub>28</sub>H<sub>35</sub>N<sub>6</sub>O [M+H]<sup>+</sup>: 471.2867; found: 471.2876.

**4-amino-7-(*O*-((*N*-Boc)piperidin-4-ylmethoxy))quinazoline (**56'**), (38mg; 107μmol; yield 77%) from **52** (53mg; 140μmol).**

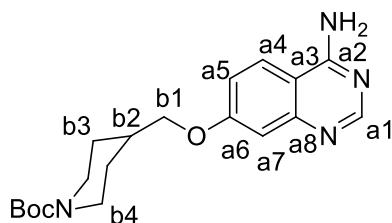

**<sup>1</sup>H NMR (500MHz, DMSO) δ** 8.30 (s, 1H, Ha1), 8.0 (d, *J*=8.7Hz, 1H, Ha4), 7.58 (brs, 2H, HNH2), 7.08 (dd, *J*=2.5, 9.1Hz, 1H, Ha5), 7.03 (d, *J*=2.5Hz, 1H, Ha7), 4.15 (m, 4H, Hb4eq and Hb1), 2.75 (m, 2H, Hb4ax), 1.98 (m, 1H, Hb2), 1.78 (d, *J*=10.9Hz, 2H, Hb3eq), 1.40 (s, 9H, HBoc), 1.19 (dq, *J*=5.4, 13.6Hz, 2H, Hb3ax).

**<sup>13</sup>C NMR (125MHz, DMSO) δ** 162.3 (Ca6), 161.7 (Ca2), 156.4 (Ca1), 154.3 (CBoc), 152.3 (Ca8), 125.6 (Ca4), 117.2 (Ca5), 109.0 (Ca3), 107.6 (Ca7), 79.0 (CBoc), 72.3 (Cb1), 43.9 (Cb4), 35.6 (Cb2), 28.7 (Cb3), 28.5 (CBoc).

**HRMS-ESI(*m/z*)** calculated for C<sub>19</sub>H<sub>27</sub>N<sub>4</sub>O<sub>3</sub> [*M*+*H*]<sup>+</sup>: 359.2078; found: 359.2087.

**4-amino-7-(piperidin-4-ylmethoxy)quinazoline (**56''**)** (26mg; 101μmol; yield 94%) from **56'** (38mg; 107μmol).

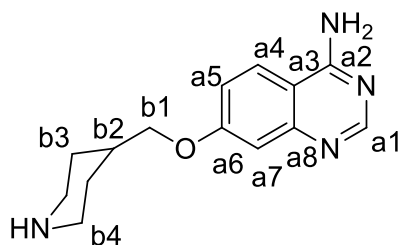



**<sup>1</sup>H NMR (500MHz, DMSO) δ** 8.30 (s, 1H, Ha1), 8.10 (d, *J*=9.1Hz, 1H, Ha4), 7.58 (brs, 2H, HNH<sub>2</sub>), 7.08 (dd, *J*=2.5, 9.1Hz, 1H, Ha5), 7.03 (d, *J*=2.5Hz, 1H, Ha7), 3.94 (m, 3H, Hb1 and HNH), 2.98 (m, 2H, Hb4eq), 2.48 (m, 2H, Hb4ax), 1.86 (m, 1H, Hb2), 1.71 (brd, *J*=11.2Hz, 2H, Hb3eq), 1.19 (dq, *J*=4.0, 12.3Hz, 2H, Hb3ax),.

5 **<sup>13</sup>C NMR (125MHz, DMSO) δ** 162.4 (Ca6), 161.7 (Ca2), 156.4 (Ca1), 152.6 (Ca8), 125.6 (Ca4), 117.3 (Ca5), 108.9 (Ca3), 107.6 (Ca7), 73.1 (Cb1), 46.0 (Cb4), 36.4 (Cb2), 30.07 (Cb3).

**HRHRMS-ESI(m/z)** calculated for C<sub>11</sub>H<sub>19</sub>N<sub>4</sub>O [M+H]<sup>+</sup>: 259.1553; found: 259.1554.

**4-amino-7-((1-(2-(quinolin-4-ylamino)ethyl)piperidin-4-yl)methoxy)quinazoline (56)**

10 (11.4mg; 27μmol; yield 68%) as a white powder from **56''** (10mg; 0.039mmol).

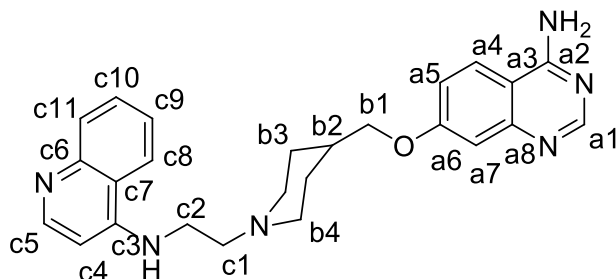

**<sup>1</sup>H NMR (500MHz, DMSO) δ** 8.39 (d, *J*=5.5Hz, 1H, Hc5), 8.29 (s, 1H, Ha1), 8.15 (m, 3H, Hc8 and HNH<sub>2</sub>), 8.10 (d, *J*=9.0, 1H, Ha4), 7.77 (dd, *J*=1.0Hz, 8.4Hz, 1H, Hc11), 7.60 (ddd, *J*=1.2, 6.8, 8.2Hz, 1H, Hc10), 7.42 (ddd, *J*=1.2, 6.8, 8.2Hz, 1H, Hc9), 7.08 (dd, *J*=2.5, 9.0Hz, 1H, Ha5), 7.06-7.01 (m, 2H, Ha7 and HNH), 6.47 (d, *J*=5.3Hz, 1H, Hc4), 3.97 (d, *J*=5.8Hz, 2H, Hb1), 3.41 (q, *J*=6.4Hz, 2H, Hc2), 3.00 (brd, *J*=11.0Hz, 2H, Hb4eq), 2.62 (t, *J*=6.2Hz, 2H, Hc1), 2.05 (t, *J*=11.9Hz, 2H, Hb4ax), 1.78 (m, 3H, Hb3eq and Hb2), 1.36 (dq, *J*=2.5, 11.9Hz, 2H, Hb3ax).

**<sup>13</sup>C NMR (125MHz, DMSO) δ** 162.4 (Ca6), 159.5 (Ca2), 156.1 (Ca1), 151.8 (Ca8), 151.2 (Cc5), 150.2 (Cc3), 148.2 (Cc6), 129.5 (Cc11), 129.1 (Cc10), 124.7 (Ca4), 124.3 (Cc9), 121.9 (Cc8), 119.2 (Cc7), 117.1 (Ca5), 109.5 (Ca3), 107.9 (Ca7), 98.7 (Cc4), 72.7 (Cb1), 56.6 (Cc1), 53.5 (Cb4), 42.6 (Ca9), 40.6 (Cc2), 35.7 (Cb2), 29.0 (Cb3), 22.4 (Ca10), 11.9 (Ca11).

5 **HRMS-ESI (m/z)** calculated for C<sub>25</sub>H<sub>29</sub>N<sub>6</sub>O [M+H]<sup>+</sup>: 429.2397; found: 429.2404.

**4-(2-(phenylamino)ethylamino)-7-(O-((N-Boc) piperidin-4-ylmethoxy)) quinazoline**

(**57'**) (50mg; 105μmol; yield 75%) from **52** (53mg; 140μmol).

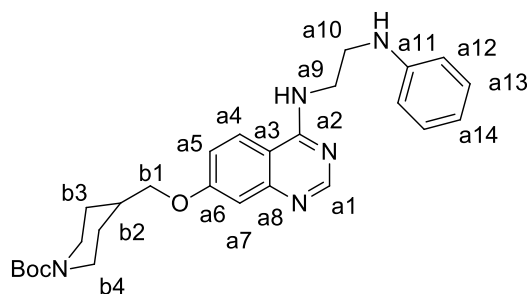

10 **<sup>1</sup>H NMR (500MHz, DMSO) δ** 8.42 (s, 1H, Ha1), 8.21 (brt, *J*=5.6 Hz, 1H, HNH), 8.09 (d, *J*=9.0Hz, 1H, Ha4), 7.15 (dd, *J*=2.7, 9.1 Hz, 1H, Ha5), 7.11-7.05 (m, 3H, Ha7 and Ha13), 6.64 (dd, *J*=0.9, 8.6Hz, 2H, Ha12), 6.53 (dt, *J*=0.9, 7.3Hz, 2H, Ha14), 5.78 (brt, *J*=5.9Hz, HNH), 4.06-3.91 (m, 4H, Hb1 and Hb4eq), 3.67 (q, *J*=6.5Hz, 2H, Ha9), 3.30 (brt, *J*=6.51Hz, 2H, Ha10), 2.85-2.67 (m, 2H, Hb4ax), 2.03-1.93 (m, 1H, Hb2), 1.82-1.75 (m, 2H, Hb3eq), 1.41 (s, 9H, HBoc), 1.26-1.15 (m, 2H, Hb3ax).

15

**<sup>13</sup>C NMR (125MHz, DMSO) δ** 162.1 (Ca6), 159.6 (Ca2), 156.0 (Ca1), 154.3 (CBoc), 151.8 (Ca8), 149.1 (Ca11), 129.4 (Ca13), 124.7 (Ca4), 117.3 (Ca5), 116.0 (Ca14), 112.4 (Ca12), 109.6 (Ca3), 108.0 (Ca7), 79.0 (CBoc), 72.3 (Cb1), 42.3 (Ca10), 40.2 (Ca9), 35.6 (Cb2), 28.7 (Cb3), 28.56 (CBoc).

**HRMS-ESI (m/z)** calculated for C<sub>27</sub>H<sub>35</sub>N<sub>5</sub>O<sub>3</sub> [M+H]<sup>+</sup>: 478.2813; found: 478.2819.

**4-(2-(phenylamino)ethylamino)-7-O-(piperidin-4-ylmethoxy)quinazoline (57'')** (38mg; 101μmol; yield 96%) from **57'** (50mg; 105μmol):

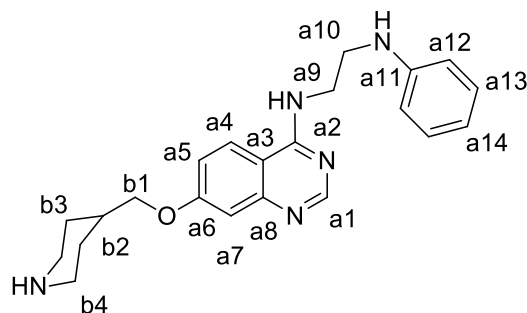

5

**<sup>1</sup>H NMR (500MHz, DMSO) δ** 8.43 (s, 1H, Ha1), 8.21 (brt, *J*=5.8 Hz, 1H, HNH), 8.11 (d, *J*=9.2Hz, 1H, Ha4), 7.12 (dd, *J*=2.6, 9.2 Hz, 1H, Ha5), 7.11-7.05 (m, 3H, Ha7 and Ha13), 6.64 (dd, *J*=0.9, 8.6Hz, 2H, Ha12), 6.53 (dt, *J*=0.9, 7.2Hz, 2H, Ha14), 5.78 (brt, *J*=6.1Hz, HNH), 3.96 (d, *J*=6.4Hz 2H, Hb1), 3.68 (q, *J*=6.5Hz, 2H, Ha9), 3.31 (brt, *J*=6.5Hz, 2H, Ha10), 3.08-2.97 (m, 2H, Hb4eq), 2.62-2.547 (m, 2H, Hb4ax), 1.97-1.86 (m, 1H, Hb2), 1.81-1.72 (m, 2H, Hb3eq), 1.32-1.20 (m, 2H, Hb3ax).

10

**<sup>13</sup>C NMR (125MHz, DMSO) δ** 162.2 (Ca6), 159.6 (Ca2), 156.0 (Ca1), 151.8 (Ca8), 149.1 (Ca11), 129.4 (Ca13), 124.7 (Ca4), 117.3 (Ca5), 116.1 (Ca14), 112.4 (Ca12), 109.5 (Ca3), 108.0 (Ca7), 72.9 (Cb1), 45.6 (Cb4), 42.3 (Ca10), 40.1 (Ca9), 35.8 (Cb2), 29.2 (Cb3).

15

**HRMS-ESI (m/z)** calculated for C<sub>22</sub>H<sub>27</sub>N<sub>5</sub>O [M+H]<sup>+</sup>: 378.2289; found: 378.2280.

**4-(2-(phenylamino)ethylamino)-7-((1-(2-(quinolin-4-ylamino)ethyl) piperidin-4-yl)methoxy)quinazoline (57)** (11mg; 20 $\mu$ mol; yield 50%) from **57''** (15mg 40 $\mu$ mol):

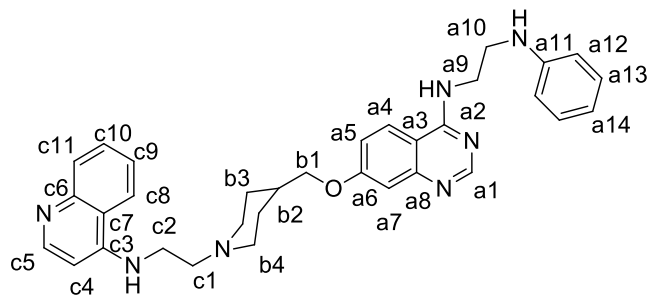

**<sup>1</sup>H NMR (500MHz, DMSO)  $\delta$**  8.42 (s, 1H, Ha1), 8.40 (d,  $J$ = 5.2Hz, 1H, Hc5), 8.26 (brt,  $J$ =5.5 Hz, 1H, HNH), 8.16 (d,  $J$ =7.9Hz, 1H, Hc8), 8.13 (d,  $J$ =9.0Hz, 1H, Ha4), 7.78 (dd,  $J$ =1.0, 8.3 Hz, 1H, Hc11), 7.61 (ddd,  $J$ =1.0, 6.8, 8.1Hz, 1H, Hc10), 7.42 (ddd,  $J$ =1.0, 6.9, 7.9Hz, 1H, Hc9), 7.13 (dd,  $J$ =2.5, 9.0 Hz, 1H, Ha5), 7.11-7.02 (m, 3H, Ha7 and Ha13), 6.64 (d,  $J$ =7.8Hz, 2H, Ha12), 6.52 (t,  $J$ =7.3Hz, 2H, Ha14), 6.48 (d,  $J$ =7.3Hz, 1H, Hc4), 5.81 (brt,  $J$ =5.8Hz, 1H, HNH), 3.99 (d,  $J$ =5.8Hz, 2H, Hb1), 3.69 (q,  $J$ =6.4Hz, 2H, Ha9), 3.41 (q,  $J$ =6.8 Hz, 2H, Hc2), 3.30 (q,  $J$ =6.40Hz, 2H, Ha10), 3.05-2.97 (m, 2H, Hb4eq), 2.63 (t,  $J$ =6.8Hz, 2H, Hc1), 2.05 (t,  $J$ =6.9 Hz, 2H, Hb4ax), 1.86-1.74 (m, 3H, Hb3eq and Hb2), 1.45-1.32 (m, 2H, Hb3ax).

**<sup>13</sup>C NMR (125MHz, DMSO)  $\delta$**  162.2 (Ca6), 159.6 (Ca2), 156.0 (Ca1), 151.8 (Ca8), 151.1 (Cc5), 150.2 (Cc3), 149.1(Ca11), 148.7 (Cc6), 129.5 (Cc11), 129.4 (Ca13), 129.1 (Cc10), 124.4 (Ca4), 124.3 (Cc9), 121.9 (Cc8), 119.2 (Cc7), 117.3 (Ca5), 116.0 (Ca14), 112.4 (Ca12), 109.6 (Ca3), 107.9 (Ca7), 98.7 (Cc4), 72.7 (Cb1), 56.6 (Cc1), 53.5 (Cb4), 42.4 (Ca10), 40.5(Hc2), 40.2 (Ca9), 35.7 (Cb2), 29.0 (Cb3).

**HRMS-ESI (m/z)** calculated for C<sub>33</sub>H<sub>38</sub>N<sub>7</sub>O [M+H]<sup>+</sup>: 548.3133; found: 548.3140.

**4-((N-(1-benzylpiperidin-4-yl))amino)-7-(O-((N-Boc) piperidin-4-ylmethoxy))**

**quinazoline (58')** (60mg; 113μmol; yield 81%) from **52** (60mg; 140μmol).

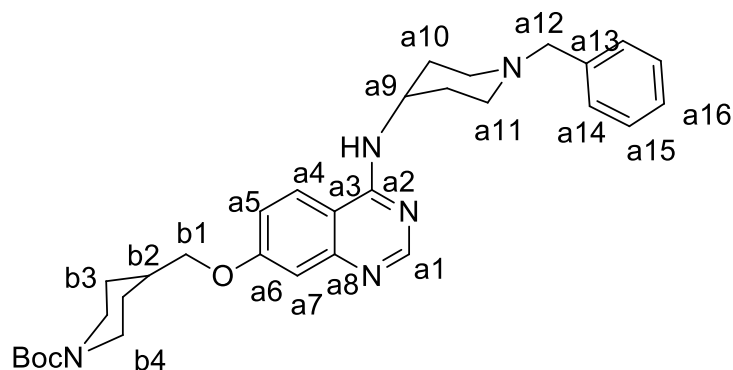

**<sup>1</sup>H NMR (500MHz, DMSO) δ** 8.36 (s, 1H, Ha1), 8.28 (brs, 1H, HNH), 8.21 (d, *J*=9.2Hz, 1H, Ha4), 7.73 (d, *J*=7.6 Hz, 1H, HNH), 7.37-7.22 (m, 5H, Ha14, Ha15 and Ha16), 7.10 (dd, *J*=2.6, 9.0Hz, 1H, Ha5), 7.04 (d, *J*=2.7Hz, 1H, Ha7), 4.16- 4.10 (m, 1H, Ha9), 4.06-3.86 (m, 3H, Hb1 and Hb4eq), 3.49 (s, 2H, Ha12), 2.86 (brd, *J*=11.8Hz, 2H, Ha11eq), 2.81-2.67 (m, 2H, Hb4ax), 2.06 (dd, *J*=1.7, 11.8Hz, 2H, Ha11ax), 2.02-1.92 (m, 1H, Hb2), 1.90 (brd, *J*=12.4Hz, 2H, Ha10eq), 1.78 (brd, *J*=13.4Hz, 2H, Hb3eq), 1.64 (dd, *J*=3.6, 12.4Hz, 2H, Ha10ax), 1.41 (s, 9H, HBoc), 1.19 (dd, *J*=4.6, 13.4Hz, 2H, Hb3ax)

**<sup>13</sup>C NMR (125MHz, DMSO) δ** 162.1 (Ca6), 158.8 (Ca2), 156.0 (Ca1), 154.3 (CBoc), 151.9 (Ca8), 139.2 (Ca13), 129.1 (Ca14), 128.6 (Ca15), 127.3 (Ca16), 124.97 (Ca4), 117.4 (Ca5), 109.5 (Ca3), 107.9 (Ca7), 78.9 (CBoc), 72.3 (Cb1), 62.6 (Ca12), 52.8 (Ca11), 48.2 (Ca9), 35.7 (Cb2), 31.7 (Ca10), 28.7 (Cb3), 28.5 (CBoc).

**HRMS-ESI (m/z)** calculated for C<sub>31</sub>H<sub>32</sub>N<sub>5</sub>O<sub>3</sub> [M+H]<sup>+</sup>: 532.3282; found: 532.3296.

**4-((N-(1-benzylpiperidin-4-yl))amino)-7-O-(piperidin-4-ylmethoxy) quinazoline**

(**58''**) (42mg; 97 $\mu$ mol; yield 86%) from **58'** (55mg; 105 $\mu$ mol).

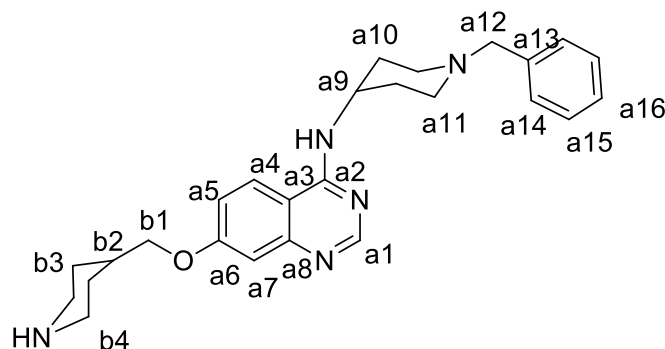

**<sup>1</sup>H NMR (500MHz, DMSO)  $\delta$**  8.37 (s, 1H, Ha1), 8.28 (brs, 1H, HNH), 8.22 (d,  $J$ =9.2Hz, 1H, Ha4), 7.74 (d,  $J$ =7.6 Hz, 1H, HNH), 7.37-7.24 (m, 4H, Ha14 and Ha15), 7.28-7.23 (m, 1H, Ha16), 7.09 (dd,  $J$ =2.6, 9.1Hz, 1H, Ha5), 7.04 (d,  $J$ =2.6Hz, 1H, Ha7), 4.20-4.10 (m, 1H, Ha9), 3.95 (d,  $J$ =6.4Hz, 2H, Hb1), 3.49 (s, 2H, Ha12), 3.01 (brd,  $J$ =12.2Hz, 2H, Hb4eq), 2.87 (brd,  $J$ =11.7Hz, 2H, Ha11eq), 2.58 (m, 2H, Hb4ax), 2.06 (dt,  $J$ =1.5, 11.7Hz, 2H, Ha11ax), 1.94-1.85 (m, 3H, Hb2 and Ha10eq), 1.78 (brd,  $J$ =10.5Hz, 2H, Hb3eq), 1.65 (ddd,  $J$ =3.7, 11.7Hz, 2H, Ha10ax), 1.23 (m, 2H, Hb3ax)

**<sup>13</sup>C NMR (125MHz, DMSO)  $\delta$**  162.1 (Ca6), 158.8 (Ca2), 156.0 (Ca1), 151.9 (Ca8), 139.2 (Ca13), 129.1 (Ca14), 128.6 (Ca15), 127.3 (Ca16), 124.9 (Ca4), 117.0 (Ca5), 109.4 (Ca3), 107.9 (Ca7), 72.9 (Cb1), 62.6 (Ca12), 52.8 (Ca11), 48.2 (Ca9), 45.7 (Cb4), 35.9 (Cb2), 31.7 (Ca10), 29.4 (Cb3).

**HRMS-ESI (m/z)** for C<sub>26</sub>H<sub>34</sub>N<sub>5</sub>O [M+H]<sup>+</sup>: 432.2758; found: 432.2753.



109.5 (Ca3), 107.8 (Ca7), 98.7 (Cc4), 72.7 (Cb1), 62.6 (Ca12), 56.6 (Cc1), 53.6 (Ca11), 52.8 (Cb4), 48.2(Ca9), 40.5 (Cc2), 35.7 (Cb2), 31.7 (Ca10), 29.0 (Cb3).

**HRMS-ESI (m/z)** calculated for C<sub>37</sub>H<sub>43</sub>N<sub>7</sub>O [M+H]<sup>+</sup>: 602.3602; found: 602.3603.

5      **4-(2-(4-benzylpiperazin-1-yl)ethyl)-7-(O-((N-Boc)piperidin-4-ylmethoxy)) quinazoline (59')** (65mg; 116μmol; yield 95%) as a white powder from **52** (53mg; 120μmol).

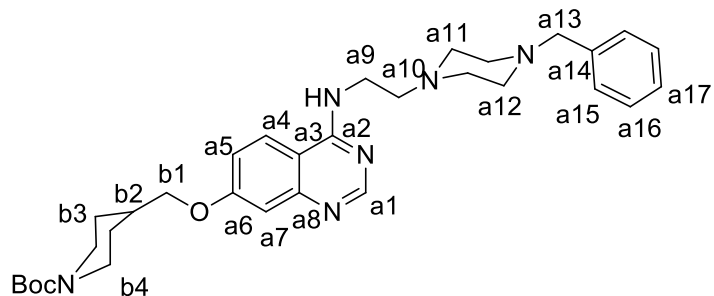

**<sup>1</sup>H NMR (500MHz, DMSO) δ** 8.37 (s, 1H, Ha1), 8.10 (d, *J*=8.7Hz, 1H, Ha4), 8.01 (brt, *J*=5.5Hz, 1H, HNH), 7.37-7.22 (m, 5H, Ha15, Ha16 and Ha17), 7.11 (dd, *J*=2.6, 8.4Hz, 1H, Ha5), 7.04 (d, *J*=2.6Hz, 1H, Ha7), 3.98 (d, *J*=6.1Hz, 2H, Hb1), 3.86 (q, *J*=6.8Hz, 2H, Ha9), 3.45 (s, 2H, Ha13), 2.90-2.70 (m, 2H, Hb4eq), 2.56 (t, *J*=6.8Hz, 2H, Ha10), 2.48-2.41 (m, 10H, Hb4ax, Ha11 and Ha12), 2.04-1.93 (m, 1H, Hb2), 1.82-1.73 (m, 2H, Hb3eq), 1.41 (s, 9H, HBoc), 1.27-1.15 (dd, *J*=4.6, 13.4Hz, 2H, Hb3ax)

**<sup>13</sup>C NMR (125MHz, DMSO) δ** 162.1 (Ca6), 159.4 (Ca2), 156.1 (Ca1), 154.3 (CBoc), 151.8 (Ca8), 138.7 (Ca14), 129.2 (Ca15), 128.6 (Ca16), 127.3 (Ca17), 124.7 (Ca4), 117.2 (Ca5), 109.5 (Ca3), 108.0 (Ca7), 79.0 (CBoc), 72.3 (Cb1), 62.5 (Ca13), 57.1 (Ca10), 53.3 (Ca12), 53.1 (Ca11), 38.4(Ca9), 35.7 (Cb2), 28.7 (Cb3), 28.6 (CBoc).

**HRMS-ESI (m/z)** calculated for C<sub>32</sub>H<sub>44</sub>N<sub>6</sub>O<sub>3</sub> [M+H]<sup>+</sup>: 561.3548; found: 561.3551.



**4-(2-(4-benzylpiperazin-1-yl)ethyl)-7-(piperidin-4-ylmethoxy)) quinazoline (59'')**

(50mg; 108μmol; yield 93%) from **59'** (65mg; 116μmol).

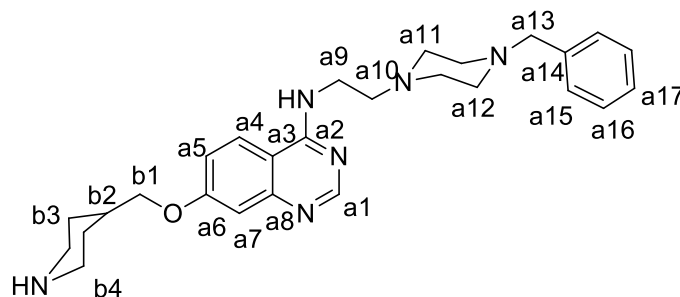

5 **<sup>1</sup>H NMR (500MHz, DMSO) δ** 8.38 (s, 1H, Ha1), 8.10 (d, *J*=9.1Hz, 1H, Ha4), 8.02 (brt, *J*=5.5Hz, 1H, HNH), 7.35-7.28 (m, 4H, Ha15 and Ha16), 7.28-7.22 (m, 1H, Ha17), 7.11 (dd, *J*=2.6, 9.1Hz, 1H, Ha5), 7.06 (d, *J*=2.6Hz, 1H, Ha7), 3.97 (d, *J*=6.5Hz, 2H, Hb1), 3.62 (q, *J*=6.5Hz, 2H, Ha9), 3.45 (s, 2H, Ha13), 3.06 (brd, *J*=12.3Hz, 2H, Hb4eq), 2.64-2.54 (m, 4H, Ha10 and Hb4ax), 2.48-2.29 (m, 8H, Ha11 and Ha12), 1.98-1.86 (m, 1H, Hb2), 1.78 (brd, *J*=10.7Hz, 2H, Hb3eq), 1.32-1.21 (m, 2H, Hb3ax)

**<sup>13</sup>C NMR (125MHz, DMSO) δ** 162.1 (Ca6), 159.5 (Ca2), 156.1 (Ca1), 151.8 (Ca8), 138.7 (Ca14), 129.2 (Ca15), 128.6 (Ca16), 127.3 (Ca17), 124.6 (Ca4), 117.2 (Ca5), 109.5 (Ca3), 108.0 (Ca7), 72.8 (Cb1), 62.5 (Ca13), 57.1 (Ca10), 53.3 (Ca12), 53.1 (Ca11), 45.4 (Hb4), 38.3 (Ca9), 35.6 (Cb2), 29.0 (Cb3).

15 **HRMS-ESI (m/z)** calculated for C<sub>27</sub>H<sub>36</sub>N<sub>6</sub>O [M+H]<sup>+</sup>: 461.3024; found: 461.3018.

**4-(2-(4-benzylpiperazin-1-yl)ethyl)-7-(piperidin-4-ylmethoxy) quinazoline (59)** (21mg; 33μmol; yield 30%) from **59''** (50mg; 109μmol).

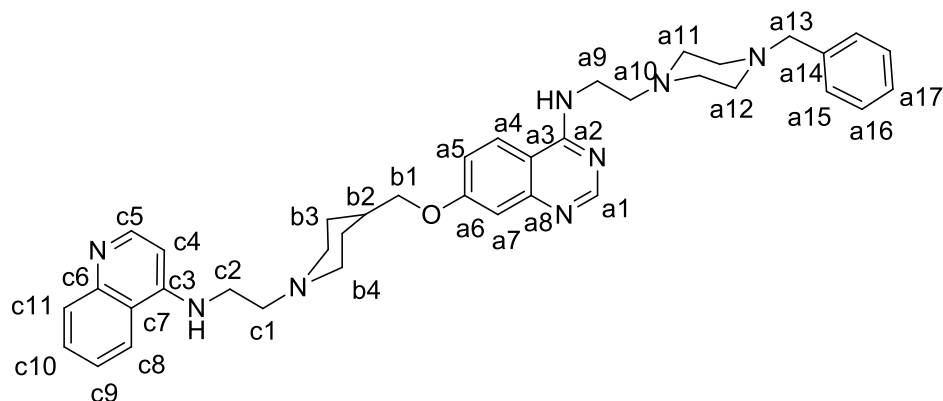

5 **<sup>1</sup>H NMR (500MHz, DMSO) δ** 8.40 (d, *J*= 5.3 Hz, 1H, Hc5), 8.38 (s, 1H, Ha1), 8.17 (d, *J*=7.8 Hz, 1H, Hc8), 8.11 (d, *J*=9.2Hz, 1H, Ha4), 8.05 (brt, *J*=5.5Hz, 1H, HNH), 7.78 (dd, *J*=1.0, 8.4 Hz, 1H, Hc11), 7.61 (m, 1H, Hc10), 7.43 (ddd, *J*=1.3, 6.9, 8.2Hz, 1H, Hc9), 7.34-7.27 (m, 4H, Ha15 and Ha16), 7.27-7.22 (m, 1H, Ha17), 7.12 (dd, *J*=2.6, 9.1Hz, 1H, Ha5), 7.06 (d, *J*=2.6Hz, 1H, Ha7), 6.48 (d, *J*=5.4 Hz, 1H, Hc4), 3.98 (d, *J*=5.9Hz, 2H, Hb1), 3.62 (q, *J*=6.5Hz, 2H, Ha9), 3.45 (s, 2H, Ha13), 3.41 (q, *J*=6.5Hz, 2H, Hc2), 3.01 (brd, *J*=11.2Hz, 2H, Hb4eq), 2.64 (t, *J*=6.8Hz, 2H, Hc1) , 2.56 (t, *J*=6.8Hz, 2H, Ha10), 2.45-2.29 (m, 8H, Ha11 and Ha12), 2.06 (brt, *J*=10.6Hz, 2H, Hb4ax), 1.86-1.75 (m, 3H, Hb2 and Hb3eq), 1.44-1.32 (m, 2H, Hb3ax)

10

**<sup>13</sup>C NMR (125MHz, DMSO) δ** 162.2 (Ca6), 159.5 (Ca2), 156.1 (Ca1), 151.8 (Ca8), 151.2 (Cc5), 150.2 (Cc3), 148.7 (Cc6), 138.7 (Ca14), 129.5 (Cc11), 129.2 (Ca15), 129.1 (Cc10), 128.6 (Ca16), 127.3 (Ca17), 127.1 (Ca15), 124.7 (Ca4), 124.3 (Cc9), 121.9 (Cc8), 119.2 (Cc7),

15

117.2 (Ca5), 109.5 (Ca3), 107.9 (Ca7), 98.7 (Cc4), 72.7 (Cb1), 62.5 (Ca13), 57.1 (Ca10), 56.6 (Cc1), 53.5 (Cb4), 53.3 (Ca12), 53.1 (Ca11), 45.6 (Cc2), 38.4 (Ca9), 35.7 (Cb2), 29.0 (Cb3).

**HRMS-ESI (m/z)** calculated for C<sub>38</sub>H<sub>47</sub>N<sub>8</sub>O [M+H]<sup>+</sup>: 631.3868; found: 631.3867.

- 5      **4-(2-(2-chlorophenyl)ethylamino)-7-(O-((N-Boc) piperidin-4-ylmethoxy)) quinazoline (60')** (54mg; 0.11mmol; yield 88%) from **52** (60mg; 140μmol).

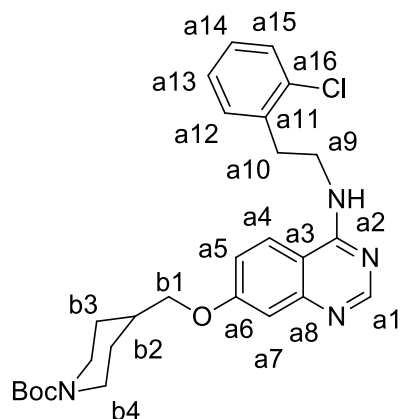

**<sup>1</sup>H NMR (500MHz, DMSO) δ** 8.41 (s, 1H, Ha1), 8.17 (brt, *J*=5.5 Hz, 1H, HNH), 8.09 (d, *J*=9.3 Hz, 1H, Ha4), 7.36-7.26 (m, 4H, Ha12 and Ha13 and Ha14), 7.11 (dd, *J*=2.7, 9.12 Hz, 1H, Ha5), 7.06 (d, *J*=2.3Hz, 1H, Ha7), 4.04-3.93 (m, 2H, Hb4eq), 3.99 (d, *J*=6.3Hz, 2H, Hb1), 3.75-3.69 (m, 2H, Ha9), 2.95 (brt, *J*=7.3Hz, 2H, Ha10), 2.83-2.68 (m, 2H, Hb4ax), 2.02-1.92 (m, 1H, Hb2), 1.81-1.73 (m, 2H, Hb3eq), 1.41 (s, 9H, HBoc), 1.20 (dq, *J*=3.8, 12.3Hz, 2H, Hb3ax).

**<sup>13</sup>C NMR (125MHz, DMSO) δ** 162.1 (Ca6), 159.4 (Ca2), 156.1 (Ca1), 154.3 (CBoc), 151.8 (Ca8), 139.1 (Ca11), 131.14 (Ca16), 131 (Ca15), 128.7 (Ca13), 128.7 (Ca14), 127.7 (Ca12), 124.6 (Ca4), 117.3 (Ca5), 109.5 (Ca3), 107.9 (Ca7), 78.9 (CBoc), 72.3 (Cb1), 43.3 (Cb4), 42.2 (Ca9), 35.6 (Cb2), 34.3 (Ca10), 28.7 (Cb3), 28.6 (CBoc).

**HRMS-ESI (m/z)** calculated for C<sub>27</sub>H<sub>34</sub>ClN<sub>4</sub>O<sub>3</sub> [M+H]<sup>+</sup>: 497.2319; found: 497.2325.

**4-(2-(2-chlorophenyl)ethylamino)-7-O-((1-(2-(quinolin-4-ylamino)ethyl) piperidin-4-yl)methoxy) (60'')** (52mg; 0.13mmol, yield 93%) from **60'** (55mg; 0.11mmol):

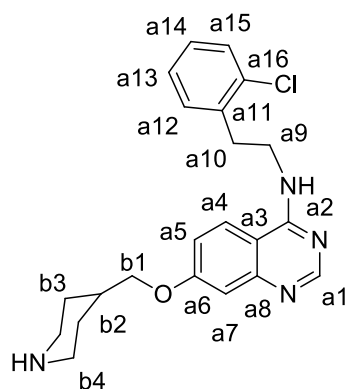

5

**<sup>1</sup>H NMR (500MHz, DMSO) δ** 8.41 (s, 1H, Ha1), 8.19 (brt, *J*=5.6Hz, 1H, HNH), 8.11 (d, *J*=9.1Hz, 1H, Ha4), 7.37-7.22 (m, 4H, Ha12 and Ha13 and Ha14), 7.10 (dd, *J*=2.7, 9.9Hz, 1H, Ha5), 7.06 (d, *J*=2.5Hz, 1H, Ha7), 3.95 (d, *J*=6.4Hz, 2H, Hb1), 3.75-3.69 (m, 2H, Ha9), 3.07-3.01 (m, 2H, Hb4eq), 2.95 (brt, *J*=7.2Hz, 2H, Ha10), 2.62-2.54 (m, 2H, Hb4ax), 1.97-1.87 (m, 1H, Hb2), 1.82-1.72 (m, 2H, Hb3eq), 1.32-1.20 (m, 2H, Hb3ax).

10

**<sup>13</sup>C NMR (125MHz, DMSO) δ** 162.1 (Ca6), 159.4 (Ca2), 156.1 (Ca1), 151.8 (Ca8), 139.1 (Ca11), 131.1 (Ca16), 131 (Ca15), 128.7 (Ca13), 128.7 (Ca14), 126.6 (Ca12) 126.6 (Ca4), 117.2 (Ca5), 109.5 (Ca3), 107.9 (Ca7), 72.9 (Cb1), 45.5 (Cb4), 42.2 (Ca9), 34.6 (Cb2), 34.3 (Ca10), 29.1 (Cb3).

15

**HRMS-ESI (m/z)** calculated for C<sub>22</sub>H<sub>34</sub>ClN<sub>4</sub>O [M+H]<sup>+</sup>: 397.1795; found: 397.1791.

**4-(2-(2-chlorophenyl)ethylamino)-7-O-((1-(2-(quinolin-4-ylamino)ethyl) piperidin-4-yl)methoxy)quinazoline (60)** (4.0mg; 7.1  $\mu$ mol; yield 29%) from **60''** (10mg; 25  $\mu$ mol):

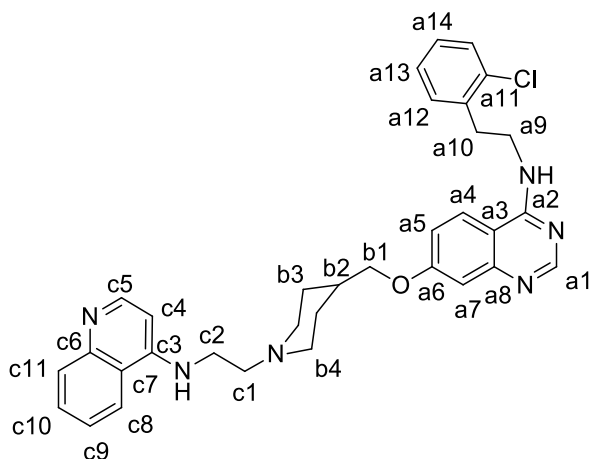

**$^1\text{H}$  NMR (500MHz, DMSO)  $\delta$**  8.40 (s, 1H, Ha1), 8.39 (d,  $J$ = 5.8Hz, 1H, Hc5), 8.16 (brt,  $J$ =5.06Hz, 1H, HNH), 8.15 (d,  $J$ =8.1Hz, 1H, Hc8), 8.10 (d,  $J$ =9.03Hz, 1H, Ha4), 7.77 (dd,  $J$ =0.9, 8.3Hz, 1H, Hc11), 7.60 (m, 1H, Hc10), 7.42 (m, 1H, Hc9), 7.36-7.24 (m, 4H, Ha12 and Ha13 and Ha14), 7.11 (dd,  $J$ =2.47, 9.12Hz, 1H, Ha5), 7.05 (d,  $J$ =2.61, 1H, Ha7), 7.03 (brt,  $J$ =5.1 Hz, 1H, HNH), 6.47 (d,  $J$ =5.3Hz, 1H, Hc4), 3.98 (d,  $J$ =5.7Hz, 2H, Hb1), 3.77-3.67 (m, 2H, Ha9), 3.44-3.36(m, 2H, Hc2), 3.04-2.97 (m, 2H, Hb4eq), 2.94 (brt,  $J$ =7.1Hz, 2H, Ha10), 2.63 (t,  $J$ =6.8Hz, 2H, Hc1), 2.06 (m, 2H, Hb4ax), 1.84-1.74(m, 3H, Hb2 and Hb3eq), 1.44-1.30 (m, 2H, Hb3ax).

**$^{13}\text{C}$  NMR (125MHz, DMSO)  $\delta$**  162.2 (Ca6), 159.4 (Ca2), 156.1 (Ca1), 151.8 (Ca8), 151.2 (Cc5), 150.2 (Cc3), 148.7 (Cc6), 139.1 (Ca11), 131.14 (Ca16), 131(Ca15), 129.5 (Cc11), 129.1 (Cc10), 128.7 (Ca13), 128.7 (Ca14), 127.9 (Ca12), 124.6 (Ca4), 124.3 (Cc9), 121.9 (Cc8), 119.2 (Cc7), 117.3 (Ca5), 109.5 (Ca3), 107.9 (Ca7), 98.7 (Cc4), 72.7 (Cb1), 56.6 (Cc1), 53.5 (Cb4), 42.2 (Ca9), 40.5 (Cc2), 35.7 (Cb2), 34.53 (Ca10), 29 (Cb3).

**HRMS-ESI (m/z)** calculated for C<sub>33</sub>H<sub>36</sub>ClN<sub>6</sub>O [M+H]<sup>+</sup>: 567.2639; found: 567.2641.

**4-(2-(3-chlorophenyl)ethylamino)-7-(O-((N-Boc)piperidin-4-ylmethoxy)) quinazoline (61')** (70mg; 0.14mmol; quantitative yield) from **52** (60mg; 140μmol).

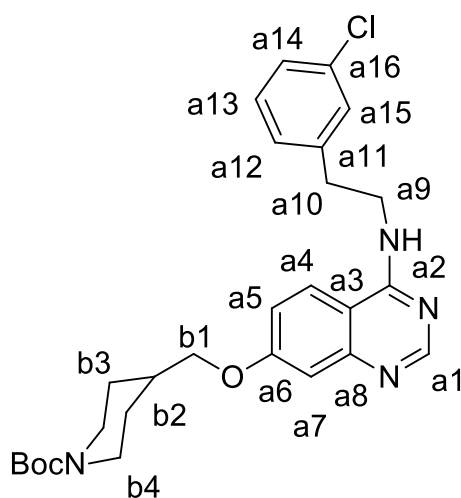

5

**<sup>1</sup>H NMR (500MHz, DMSO)** δ 8.41 (s, 1H, Ha1), 8.18 (brt, *J*=5.5Hz, 1H, HNH), 8.10 (d, *J*=9.1Hz, 1H, Ha4), 7.35-7.19 (m, 4H, Ha12 and Ha13 and Ha14), 7.11 (dd, *J*=2.5, 9.1Hz, 1H, Ha5), 7.06 (d, *J*=2.5Hz, 1H, Ha7), 4.03-3.93 (m, 2H, Hb4eq), 3.99 (d, *J*=6.3Hz, 2H, Hb1), 3.77-3.71 (m, 2H, Ha9), 2.97 (brt, *J*=7.0Hz, 2H, Ha10), 2.85-2.68 (m, 2H, Hb4ax), 2.02-1.93 (m, 1H, Hb2), 1.81-1.74 (m, 2H, Hb3eq), 1.41 (s, 9H, HBoc), 1.20 (dq, *J*=4.9, 13.1Hz, 2H, Hb3ax)

10

**<sup>13</sup>C NMR (125MHz, DMSO)** δ 162.1 (Ca6), 159.4 (Ca2), 156.1 (Ca1), 154.3 (CBoc), 151.8 (Ca8), 142.7 (Ca11), 133.3 (Ca16), 130.5 (Ca15), 129.0 (Ca13), 127.9 (Ca12), 126.5 (Ca14), 124.61 (Ca4), 117.3 (Ca5), 109.5 (Ca3), 107.9 (Ca7), 78.9 (CBoc), 72.3 (Cb1), 42.02 (Ca9), 35.6 (Cb2), 34.5 (Ca10), 28.7 (Cb3), 28.6 (CBoc).

15

**HRMS-ESI (m/z)** calculated for C<sub>27</sub>H<sub>34</sub>ClN<sub>4</sub>O<sub>3</sub> [M+H]<sup>+</sup>: 497.2319; found: 497.2342.

**4-(2-(3-chlorophenyl)ethylamino)-7-O-(piperidin-4-ylmethoxy)quinazoline (61'')**

(56mg; 0.14mmol; quantitative yield) from **61'** (69mg; 0.14mmol):

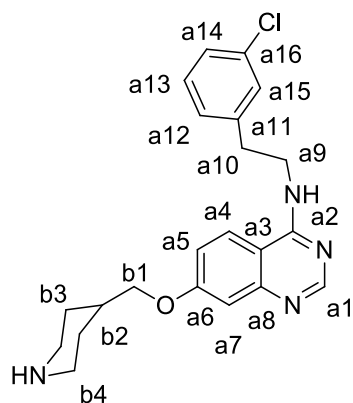

5 **<sup>1</sup>H NMR (500MHz, DMSO) δ** 8.41 (s, 1H, Ha1), 8.21 (brt, *J*=5.3Hz, 1H, HNH), 8.12 (d, *J*=9.1 Hz, 1H, Ha4), 7.35-7.20 (m, 4H, Ha12 and Ha13 and Ha14), 7.11 (dd, *J*=2.6, 9.0Hz, 1H, Ha5), 7.07 (d, *J*=2.54Hz, 1H, Ha7), 3.96 (d, *J*=6.4Hz, 2H, Hb1), 3.77-3.71 (m, 2H, Ha9), 3.11-3.06 (m, 2H, Hb4eq) 2.97 (brt, *J*=7.1Hz, 2H, Ha10), 2.68-2.60 (m, 2H, Hb4ax), 2.00-1.89 (m, 1H, Hb2), 1.83-1.74 (m, 2H, Hb3eq), 1.30 (dq, *J*=2.9, 12.2Hz, 2H, Hb3ax).

10 **<sup>13</sup>C NMR (125MHz, DMSO) δ** 162.1 (Ca6), 159.4 (Ca2), 156.1 (Ca1), 151.8 (Ca8), 142.7 (Ca11), 133.3 (Ca16), 130.6 (Ca15), 129.0 (Ca13), 127.9 (Ca12), 126.6 (Ca14) 124.7 (Ca4), 117.2 (Ca5), 109.6 (Ca3), 108 (Ca7), 72.7 (Cb1), 45.1 (Cb4), 42 (Ca9), 34.9 (Cb2), 34.5 (Ca10), 28.5 (cb3).

**HRMS-ESI (m/z)** calculated for C<sub>22</sub>H<sub>25</sub>ClN<sub>4</sub>O [M+H]<sup>+</sup>: 397.1795; found: 397.1799.

**4-(2-(3-chlorophenyl)ethylamino)-7-((1-(2-(quinolin-4-ylamino)ethyl) piperidin-4-yl)methoxy)quinazoline (61)** (5.0mg; 8.8μmol; yield 35%) from **61'** (10mg; 25μmol):

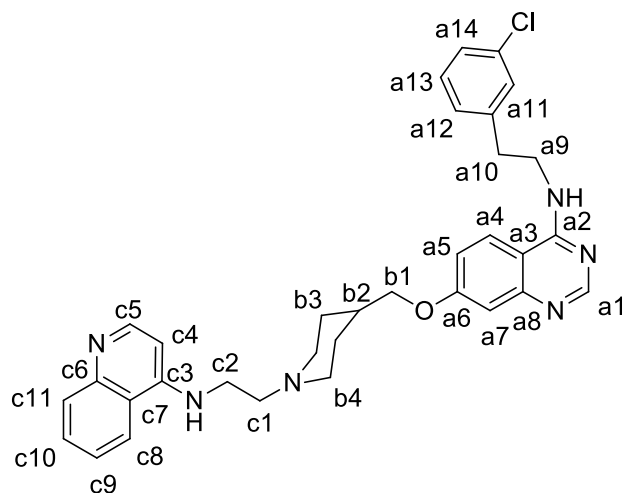

**<sup>1</sup>H NMR (500MHz, DMSO) δ** 8.41 (s, 1H, Ha1), 8.39 (d, *J*= 5.4Hz, 1H, Hc5) 8.18 (brt, *J*=5.3Hz, 1H, HNH), 8.15 (d, *J*=8.4Hz, 1H, Hc8), 8.10 (d, *J*=9.0Hz, 1H, Ha4), 7.77 (dd, *J*=0.9, 8.4Hz, 1H, Hc11), 7.60(m, 1H, Hc10), 7.42 (m, 1H, Hc9), 7.36-7.18 (m, 4H, Ha12 and Ha13 and Ha14), 7.11 (dd, *J*=2.6, 9.,2Hz, 1H, Ha5), 7.06 (d, *J*=2.5Hz, 1H, Ha7), 7.03 (brt, *J*=5.4Hz, 1H, HNH), 6.47 (d, *J*=5.4Hz, 1H, Hc4), , 3.98 (d, *J*=5.9Hz, 2H, Hb1), 3.79-3.69 (m, 2H, Ha9), 3.44-3.36 (m, 2H, Hc2), 3.00 (m, 2H, Hb4eq), 2.97 (brt, *J*=7.1Hz, 2H, Ha10), 2.63 (t, *J*=6.7Hz, 2H, Hc1), 2.06 (m, 2H, Hb4ax), 1.85-1.72 (m, 3H, Hb2 and Hb3eq), 1.45-1.30 (m, 2H, Hb3ax).

**<sup>13</sup>C NMR (125MHz, DMSO) δ** 162.2 (Ca6), 159.4 (Ca2), 156.1 (Ca1), 151.8 (Ca8), 151.2 (Cc5), 150.2 (Cc3), 148.7 (Cc6), 142.7 (Ca11), 133.3 (Ca16), 130.6 (Ca15), 129.5 (Cc11), 129.1 (Cc10), 129.0 (Ca13), 127.9 (Ca12), 126.5 (Ca14), 124.6 (Ca4), 124.3 (Cc9), 121.9 (Cc8), 119.2 (Cc7), 117.3 (Ca5), 109.5 (Ca3), 107.9 (Ca7), 98.7 (Cc4), 72.7 (Cb1), 56.6 (Cc1), 53.6 (Cb4), 42.1 (Ca9), 40.4 (Cc2), 34.5 (Cb2), 34.5 (Ca10), 29 (Cb3)

**HRMS-ESI (m/z)** calculated for C<sub>33</sub>H<sub>36</sub>ClN<sub>6</sub>O [M+H]<sup>+</sup>: 567.2639; found: 567.2644.



**4-(2-(4-chlorophenyl)ethylamino)-7-(O-((N-Boc)piperidin-4-ylmethoxy)) quinazoline**

(**62'**) (93mg; 140μmol; quantitative yield) from **52** (60mg; 140μmol):

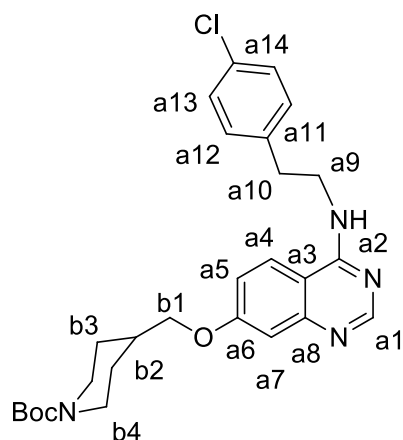

5

**<sup>1</sup>H NMR (500MHz, DMSO) δ** 8.41 (s, 1H, Ha1), 8.21 (brt, *J*=5.7Hz, 1H, HNH), 8.10 (d, *J*=9.2Hz, 1H, Ha4), 7.47-7.31 (m, 4H, Ha12 and Ha13 and Ha14), 7.11 (dd, *J*=2.5, 8.9Hz, 1H, Ha5), 7.06 (d, *J*=2.6Hz, 1H, Ha7), 4.03-3.94 (m, 2H, Hb4eq), 3.98 (d, *J*=6.4Hz, 2H, Hb1), 3.80-3.71 (m, 2H, Ha9), 3.09 (brt, *J*=7.4Hz, 2H, Ha10), 2.75-2.60 (m, 2H, Hb4ax), 2.02-1.92 (m, 1H, Hb2), 1.81-1.73 (m, 2H, Hb3eq), 1.41 (s, 9H, HBoc), 1.20 (dq, *J*=3.9, 12.4Hz, 2H, Hb3ax).

10

**<sup>13</sup>C NMR (125MHz, DMSO) δ** 162.1 (Ca6), 159.5 (Ca2), 156.1 (Ca1), 154.3 (CBoc), 151.8 (Ca8), 138.2 (Ca11), 131.6 (Ca14), 129.6 (Ca12), 127.7 (Ca13), 124.7 (Ca4), 117.3 (Ca5), 109.6 (Ca3), 107.9 (Ca7), 78.9 (CBoc), 72.3 (Cb1), 43.1 (Cb4), 42.4 (Ca9), 35.6 (Cb2), 32.8 (Ca10), 28.7 (Cb3), 28.6 (CBoc).

15

**HRMS-ESI (m/z)** calculated for C<sub>27</sub>H<sub>34</sub>ClN<sub>4</sub>O<sub>3</sub> [M+H]<sup>+</sup>: 497.2319; found: 497.2318.

**4-(2-(4-chlorophenyl)ethylamino)-7-O-(piperidin-4-ylmethoxy)quinazoline (62'')**

(50mg; 0.13mmol; yield 93%) from **62'** (70mg; 0.14mmol):

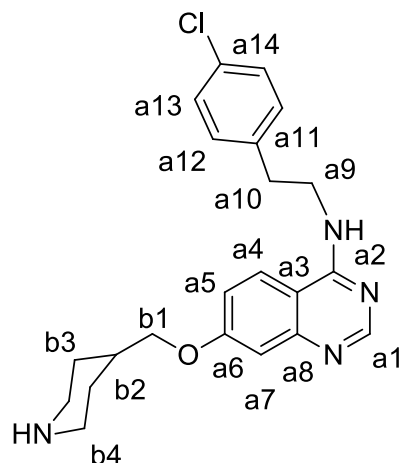

**<sup>1</sup>H NMR (500MHz, DMSO) δ** 8.41 (s, 1H, Ha1), 8.23 (m, 1H, HNH), 8.11 (d, *J*=9.1Hz, 1H, Ha4), 7.37-7.22 (m, 4H, Ha12 and Ha13 and Ha14), 7.13-7.08 (m, 1H, Ha5), 7.08-7.03 (m, 1H, Ha7), 3.95 (d, *J*=5.9Hz, 2H, Hb1), 3.75-3.69 (m, 2H, Ha9), 3.07-3.01 (m, 2H, Hb4eq) 2.95 (brt, *J*=7.2Hz, 2H, Ha10), 2.62-2.54 (m, 2H, Hb4ax), 1.97-1.87 (m, 1H, Hb2), 1.82-1.72 (m, 2H, Hb3eq), 1.32-1.20 (m, 2H, Hb3ax).

**<sup>13</sup>C NMR (125MHz, DMSO) δ** 162.1 (Ca6), 159.4 (Ca2), 156.1 (Ca1), 151.8 (Ca8), 139.1 (Ca11), 131.1 (Ca16), 131 (Ca15), 128.7 (Ca13), 128.7 (Ca14), 126.6 (Ca12) 126.6 (Ca4), 117.2 (Ca5), 109.5 (Ca3), 107.9 (Ca7), 72.9 (Cb1), 45.5 (Cb4), 42.2 (Ca9), 34.6 (Cb2), 34.3 (Ca10), 29.1 (Cb3)

**HRMS-ESI (m/z)** calculated for C<sub>22</sub>H<sub>26</sub>ClN<sub>4</sub>O [M+H]<sup>+</sup>: 397.1795; found: 397.1794.

**4-(2-(4-chlorophenyl)ethylamino)-7-((1-(2-(quinolin-4-ylamino)ethyl) piperidin-4-yl)methoxy)quinazoline (62)** (3.0mg; 5.3μmol; yield 21%) from **62'** (10mg; 25μmol):

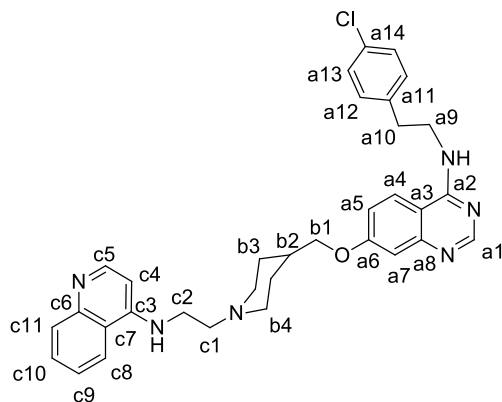

**<sup>1</sup>H NMR (500 MHz, DMSO) δ** 8.40 (s, 1H, Ha1), 8.40 (d, *J*=5.3Hz, 1H, Hc5), 8.21 (brt, *J*=5.6Hz, 1H, HNH), 8.16 (dd, *J*=0.9, 8.2Hz, 1H, Hc8), 8.10 (d, *J*=9.3Hz, 1H, Ha4), 7.78 (dd, *J*=1.1, 8.5Hz, 1H, Hc11), 7.61(m, 1H, Hc10), 7.46-7.22 (m, 5H, Hc9 and Ha12 and Ha13), 7.11 (dd, *J*=2.6, 9.1Hz, 1H, Ha5), 7.06 (d, *J*=2.5Hz, 1H, Ha7), 7.03 (brt, *J*=5.3Hz, 1H, HNH), 6.48 (d, *J*=5.5Hz, 1H, Hc4), 3.99 (d, *J*=5.9Hz, 2H, Hb1), 3.80-3.73 (m, 2H, Ha9), 3.41 (q, *J*=6.5Hz, 2H, Hc2), 3.05-2.97 (m, 2H, Hb4eq), 3.09 (brt, *J*=6.9Hz, 2H, Ha10), 2.64 (t, *J*=6.9Hz, 2H, Hc1), 2.11-2.02 (m, 2H, Hb4ax), 1.85-1.76(m, 3H, Hb2 and Hb3eq), 1.38 (dq, *J*=2.5, 12.2Hz, 2H, Hb3ax).

**<sup>13</sup>C NMR (125MHz, DMSO) δ** 162.2 (Ca6), 159.5 (Ca2), 156.1 (Ca1), 151.8 (Ca8), 151.2 (Cc5), 150.2 (Cc3), 148.7 (Cc6), 137.5 (Ca11), 131.6 (Ca14), 129.6 (Ca12), 129.5 (Cc11), 129.1 (Cc10), 127.7 (Ca13), 124.7 (Ca4), 124.3 (Cc9), 121.9 (Cc8), 119.2 (Cc7), 117.3 (Ca5), 109.5 (Ca3), 107.9 (Ca7), 98.7 (Cc4), 72.7 (Cb1), 56.6 (Cc1), 53.5 (Cb4), 46.1 (Ca9), 40.6 (Hc2), 35.7 (Cb2), 32.8 (Ca10), 29 (Cb3).

**HRMS-ESI (m/z)** calculated for C<sub>33</sub>H<sub>36</sub>ClN<sub>6</sub>O [M+H]<sup>+</sup>: 567.2639; found: 567.2635.

**4-(2-(4-methoxyphenyl)ethylamino)-7-(O-((*N*-Boc)piperidin-4-ylmethoxy)) quinazoline**

(**63'**) (49mg; 101μmol; yield 71%) from **52** (60mg; 140μmol).

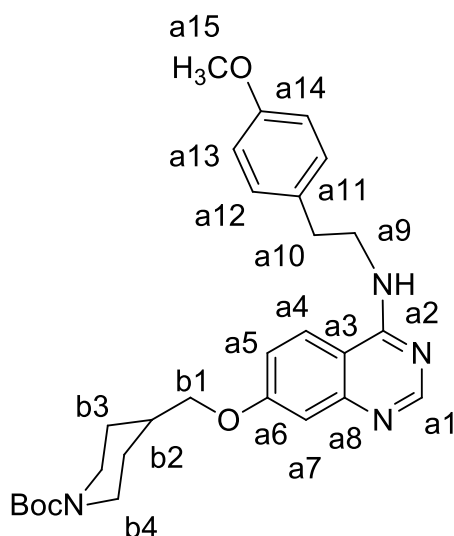

**<sup>1</sup>H NMR (500MHz, DMSO) δ** 8.42 (s, 1H, Ha1), 8.16 (brt, *J*=5.7Hz, 1H, HNH), 8.10 (d, *J*=9.2 Hz, 1H, Ha4), 7.20-7.15 (m, 2H, Ha12), 6.88-6.83 (m, 2H, Ha13 ), 7.11 (dd, *J*=2.6, 9.1Hz, 1H, Ha5), 7.06 (d, *J*=2.5Hz, 1H, Ha7), 4.06-3.94 (m, 2H, Hb4eq), 3.99 (d, *J*=6.3Hz, 2H, Hb1), 3.72 (s, 3H, Ha15), 3.71-3.64 (m, 2H, Ha9), 2.88(brt, *J*=7.1Hz, 2H, Ha10), 2.84-2.67 (m, 2H, Hb4ax), 2.04-1.93 (m, 1H, Hb2), 1.83-1.74 (m, 2H, Hb3eq), 1.41 (s, 9H, HBoc), 1.26-1.12 (m, 2H, Hb3ax).

**<sup>13</sup>C NMR (125MHz, DMSO) δ** 162.1 (Ca6), 159.4 (Ca2), 158.1 (Ca14), 156.1 (Ca1), 154.3 (CBoc), 151.8 (Ca8), 144.3 (Ca11), 130.2 (Ca12), 124.6 (Ca4), 117.2 (Ca5), 114.2 (Ca13), 109.6 (Ca3), 107.9 (Ca7), 78.9 (CBoc), 72.3 (Cb1), 55.4 (Ca15), 43.4(Cb4), 42.7 (Ca9), 35.6 (Cb2), 34.2 (Ca10), 28.7 (Cb3), 28.6 (CBoc).

**HRMS-ESI (m/z)** calculated for C<sub>28</sub>H<sub>37</sub>N<sub>4</sub>O<sub>4</sub> [M+H]<sup>+</sup>: 493.2814; found: 493.2825.

**4-(2-(4-methoxyphenyl)ethylamino)-7-*O*-(piperidin-4-ylmethoxy)quinazoline (63'')**

(39.0mg; 101μmol; quantitative yield) from **63'** (50mg; 101μmol):

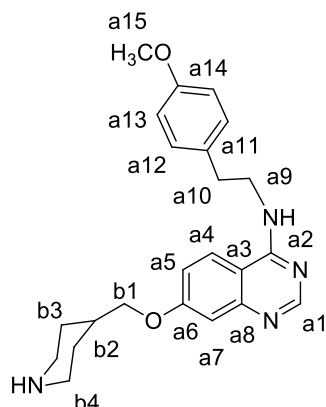

5 **<sup>1</sup>H NMR (500MHz, DMSO) δ** 8.41 (s, 1H, Ha1), 8.16 (brt, *J*=5.4Hz, 1H, HNH), 8.11 (d, *J*=9.2Hz, 1H, Ha4), 7.20-7.15 (m, 2H, Ha12), 7.11 (dd, *J*=2.6, 9.1Hz, 1H, Ha5), 7.05 (d, *J*=2.6Hz, 1H, Ha7), 6.88-6.83 (m, 2H, Ha13), 3.94 (d, *J*=6.3Hz, 2H, Hb1), 3.72 (s, 3H, Ha15) 3.71-3.65 (m, 2H, Ha9), 3.01-2.92 (m, 2H, Hb4eq), 2.88 (brt, *J*=7.3Hz, 2H, Ha10), 2.57-2.52 (m, 2H, Hb4ax), 1.92-1.82 (m, 1H, Hb2), 1.76-1.68 (m, 2H, Hb3eq), 1.26-1.14 (m, 2H, Hb3ax).

10 **<sup>13</sup>C NMR (125MHz, DMSO) δ** 162.1 (Ca6), 159.4 (Ca2), 158.1 (Ca14), 156.1 (Ca1), 151.8 (Ca8), 144.3 (Ca11), 130.2 (Ca12), 124.6 (Ca4), 117.2 (Ca5), 114.2 (Ca13), 109.6 (Ca3), 107.9 (Ca7), 72.3 (Cb1), 55.4 (Ca15), 42.7 (Ca9), 35.6 (Cb2), 34.2 (Ca10), 28.7 (Cb3).

**HRMS-ESI (m/z)** calculated for C<sub>23</sub>H<sub>29</sub>N<sub>4</sub>O<sub>2</sub> [M+H]<sup>+</sup>: 393.2290; found: 393.2297.

15

**4-(2-(4-methoxyphenyl)ethylamino)-7-((1-(2-(quinolin-4-ylamino)ethyl) piperidin-4-yl)methoxy)quinazoline (63)** (15mg; 27μmol; yield 71%) from **63''** (15mg; 38μmol):

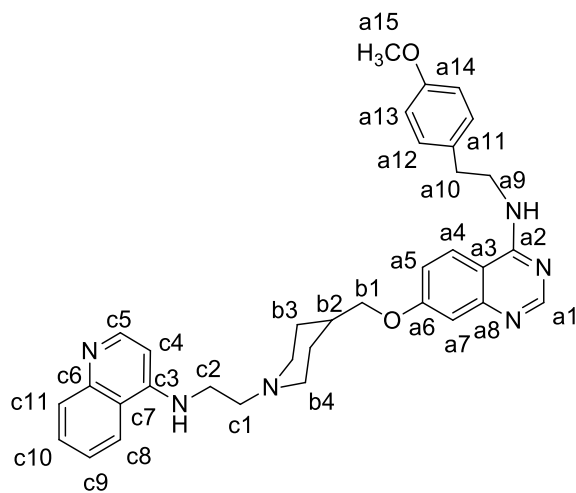

**<sup>1</sup>H NMR (500MHz, DMSO) δ** 8.41 (s, 1H, Ha1), 8.40 (d, *J*= 5.3Hz, 1H, Hc5), 8.18 (brt, *J*=5.4Hz, 1H, HNH), 8.16 (m, 1H, Hc8), 8.12 (d, *J*=9.2Hz, 1H, Ha4), 7.78 (dd, *J*=0.9, 8.3Hz, 1H, Hc11), 7.61(m, 1H, Hc10), 7.43 (m, 1H, Hc9), 7.20-7.15 (m, 2H, Ha12), 7.12 (dd, *J*=2.6, 9.1Hz, 1H, Ha5), 7.06 (d, *J*=2.6Hz, 1H, Ha7), 7.04 (brt, *J*=5.4Hz, 1H, HNH), 6.88-6.82 (m, 2H, Ha13), 6.48 (d, *J*=5.4Hz, 1H, Hc4), 3.98 (d, *J*=5.9Hz, 2H, Hb1), 3.72 (s, 3H, Ha15), 3.73-3.64 (m, 2H, Ha9), 3.44-3.38 (m, 2H, Hc2), 3.04-2.96 (m, 2H, Hb4eq), 2.89 (brt, *J*=7.1Hz 2H, Ha10), 2.63 (t, *J*=6.8Hz, 2H, Hc1), 2.10-2.01 (m, 2H, Hb4ax), 1.84-1.74(m, 3H, Hb2 and Hb3eq), 1.44-1.31 (m, 2H, Hb3ax).

**<sup>13</sup>C NMR (125MHz, DMSO) δ** 162.2 (Ca6), 159.4 (Ca2), 158.1 (Ca14), 156.1 (Ca1), 151.8 (Ca8), 151.2 (Cc5), 150.2 (Cc3), 148.7 (Cc6), 131.8 (Ca11), 130.1 (Ca12), 129.5 (Cc11), 129.1 (Cc10), 124.6 (Ca4), 124.3 (Cc9), 121.9 (Cc8), 119.2 (Cc7), 117.2 (Ca5), 114.2 (Ca13), 109.6 (Ca3), 107.9 (Ca7), 98.7 (Cc4), 72.7 (Cb1), 56.6 (Cc1), 55.4 (Ca15), 53.5 (Cb4), 42.7 (Ca9), 40.6 (Cc2), 35.7 (Cb2), 34.2 (Ca10), 29 (Cb3).

**HRMS-ESI (m/z)** calculated for C<sub>34</sub>H<sub>39</sub>N<sub>6</sub>O<sub>2</sub> [M+H]<sup>+</sup>: 563.3134; found: 563.3145.

**4-(2-(4-nitrophenyl)ethylamino)-7-(*O*-((*N*-Boc)piperidin-4-ylmethoxy)) quinazoline**

(**64'**) (68mg; 132μmol; yield 93%) from **52** (60mg; 140μmol).

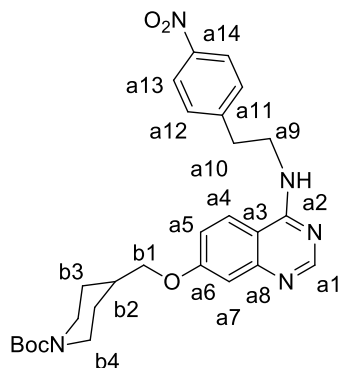

**<sup>1</sup>H NMR (500MHz, DMSO) δ** 8.41 (s, 1H, Ha1), 8.20 (brt, *J*=5.6Hz, 1H, HNH), 8.18-8.14  
 5 (m, 2H, Ha13), 8.12 (d, *J*=9.2Hz, 1H, Ha4), 7.56-7.52 (m, 2H, Ha12), 7.11 (dd, *J*=2.5, 9.0Hz, 1H, Ha5), 7.06 (d, *J*=2.5Hz, 1H, Ha7), 4.06-3.96 (m, 2H, Hb4eq), 3.98 (d, *J*=6.3Hz, 2H, Hb1), 3.74-3.67 (m, 2H, Ha9), 2.94-2.88 (m, 2H, Ha10), 2.88-2.72 (m, 2H, Hb4ax), 2.85 (q, *J*=6.7Hz, 1H, Ha15) 2.02-1.94 (m, 1H, Hb2), 1.81-1.75 (m, 2H, Hb3eq), 1.41 (s, 9H, HBoc), 1.27-1.13 (m, 2H, Hb3ax).

**<sup>13</sup>C NMR (125MHz, DMSO) δ** 162.1 (Ca6), 159.4 (Ca2), 156.1 (Ca1), 154.3 (CBoc),  
 10 151.8 (Ca8), 146.5 (Ca11), 137.4 (Ca14), 130.6 (Ca12), 124.7 (Ca4), 123.8 (Ca13), 117.2 (Ca5), 109.6 (Ca3), 107.9 (Ca7), 78.9 (CBoc), 72.3 (Cb1), 43.2 (Cb4), 42.5 (Ca9), 35.6 (Cb2), 34.7 (Ca10), 28.8 (Cb3), 28.6 (CBoc).

**HRMS-ESI (m/z)** calculated for C<sub>27</sub>H<sub>34</sub>N<sub>5</sub>O<sub>5</sub> [M+H]<sup>+</sup>: 508.2559; found: 508.2565.

15

**4-(2-(4-nitrophenyl)ethylamino)-7-*O*-(piperidin-4-ylmethoxy)quinazoline (**64''**)** (51mg;

132μmol; quantitative yield) from **64'** (67mg; 132μmol):

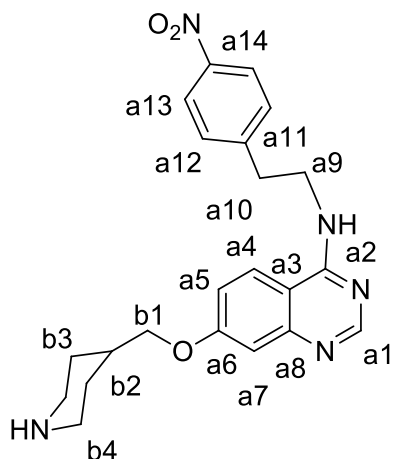

**<sup>1</sup>H NMR (500MHz, DMSO) δ** 8.41 (s, 1H, Ha1), 8.19 (brt, *J*=5.4Hz, 1H, HNH), 8.18-8.14 (m, 2H, Ha13), 8.08 (d, *J*=9.2Hz, 1H, Ha4), 7.57-7.52 (m, 2H, Ha12), 7.11 (dd, *J*=2.6, 9.1Hz, 1H, Ha5), 7.06 (d, *J*=2.6Hz, 1H, Ha7), 3.94 (d, *J*=6.4Hz, 2H, Hb1), 3.83-3.76 (m, 2H, Ha9),  
 5 3.11 (brt, *J*=7.2Hz, 2H, Ha10), 3.03-2.97 (m, 2H, Hb4eq), 2.61-2.53 (m, 2H, Hb4ax), 1.94-1.83 (m, 1H, Hb2), 1.77-1.69 (m, 2H, Hb3eq), 1.26-1.16 (m, 2H, Hb3ax).

**<sup>13</sup>C NMR (125MHz, DMSO) δ** 162.1 (Ca6), 159.4 (Ca2), 156.1 (Ca1), 151.8 (Ca8), 146.5 (Ca11), 137.4 (Ca14), 130.6 (Ca12), 124.7 (Ca4), 123.8 (Ca13), 117.2 (Ca5), 109.6 (Ca3), 107.9 (Ca7), 72.3 (Cb1), 43.2 (Cb4), 42.5 (Ca9), 35.6 (Cb2), 34.7 (Ca10), 28.8 (Cb3).

10 **HRMS-ESI (m/z)** calculated for C<sub>22</sub>H<sub>26</sub>N<sub>5</sub>O<sub>3</sub> [M+H]<sup>+</sup>: 408.2035; found: 408.2024.

15 **4-(2-(4-nitrophenyl)ethylamino)-7-((1-(2-(quinolin-4-ylamino)ethyl) piperidin-4-yl)methoxy)quinazoline (64)** (7mg; 12μmol; yield 33%) from **64''** (15mg; 37μmol):



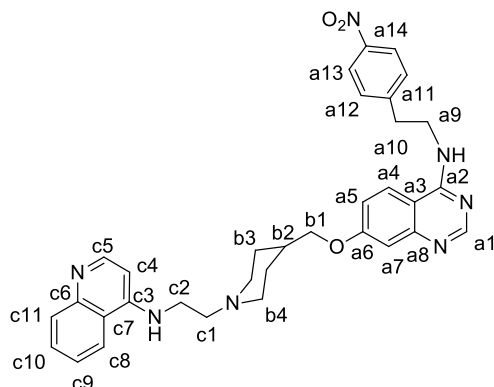

**<sup>1</sup>H NMR (500MHz, DMSO) δ** 8.41 (s, 1H, Ha1), 8.40 (d, *J*= 5.3Hz, 1H, Hc5), 8.21 (brt, *J*=5.5 Hz, 1H, HNH), 8.18-8.14(m, 3H, Ha13 and Hc8), 8.09 (d, *J*=9.2 Hz, 1H, Ha4), 7.78 (dd, *J*=1.2, 8.4Hz, 1H, Hc11), 7.61 (m, 1H, Hc10), 7.57-7.52 (m, 2H, Ha12), 7.43 (m, 1H, Hc9), 7.12 (dd, *J*=2.73, 9.25Hz, 1H, Ha5), 7.06 (d, *J*=2.6Hz, 1H, Ha7), 7.04 (brt, *J*=5.54Hz, 1H, HNH), 6.48 (d, *J*=5.37Hz, 1H, Hc4), 3.98 (d, *J*=5.9Hz, 2H, Hb1), 3.83-3.77 (m, 2H, Ha9), 3.41 (q, *J*=8.4Hz, 2H, Hc2), 3.12 (brt, *J*=6.9Hz, 2H, Ha10), 3.04-2.97 (m, 2H, Hb4eq), 2.66-2.61 (m, 2H, Hc1), 2.10-2.02 (m, 2H, Hb4ax), 1.84-1.76(m, 3H, Hb2 and Hb3eq), 1.44-1.31 (m, 2H, Hb3ax).

**<sup>13</sup>C NMR (125MHz, DMSO) δ** 162.2 (Ca6), 159.4 (Ca2), 156 (Ca1), 151.8 (Ca8), 151.2 (Cc5), 150.2 (Cc3), 148.7 (Cc6), 148.6 (Ca14), 146.5 (Ca11), 130.5 (Ca12), 129.5 (Cc11), 129.1 (Cc10), 123.8 (Ca13), 124.6 (Ca4), 124.3 (Cc9), 121.9 (Cc8), 119.2 (Cc7), 117.4 (Ca5), 109.5 (Ca3), 107.9 (Ca7), 98.7 (Cc4), 72.7 (Cb1), 56.6 (Cc1), 53.5 (Cb4), 41.9 (Ca9), 40.6 (Cc2), 35.7 (Cb2), 34.8 (Ca10), 29 (Cb3).

**HRMS-ESI (m/z)** calculated for C<sub>33</sub>H<sub>36</sub>N<sub>7</sub>O<sub>3</sub> [M+H]<sup>+</sup>: 578.2879; found: 578.2891.

**4-(2-(4-aminophenyl)ethylamino)-7-(O-((N-Boc) piperidin-4-ylmethoxy)) quinazoline (65')** (67mg; 140μmol; quantitative yield) from **52** (60mg; 140μmol)

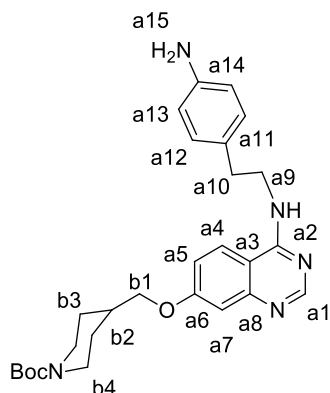

**<sup>1</sup>H NMR (500MHz, DMSO) δ** 8.40 (s, 1H, Ha1), 8.14 (brt, *J*=5.5Hz, 1H, HNH), 8.12 (d, *J*=9.3 Hz, 1H, Ha4), 7.10 (dd, *J*=2.6, 9.6Hz, 1H, Ha5), 7.05 (d, *J*=2.5Hz, 1H, Ha7), 6.93-6.88 (m, 2H, Ha12), 6.52-6.47 (m, 2H, Ha13), 4.85 (s, 2H, Ha15), 4.06-3.92 (m, 2H, Hb4eq), 3.99 (d, *J*=6.5Hz, 2H, Hb1), 3.67-3.57 (m, 2H, Ha9), 2.75(brt, *J*=7.5Hz, 2H, Ha10), 2.84-2.68 (m, 2H, Hb4ax), 2.03-1.92 (m, 1H, Hb2), 1.82-1.73 (m, 2H, Hb3eq), 1.41 (s, 9H, HBoc), 1.26-1.14 (m, 2H, Hb3ax).

**<sup>13</sup>C NMR (125MHz, DMSO) δ** 162 (Ca6), 159.4 (Ca2), 156.1 (Ca1), 154.3 (CBoc), 151.8 (Ca8), 147.2 (Ca14), 129.6 (Ca12), 129.3 (Ca11), 114.4 (Ca13), 124.7 (Ca4), 117.1 (Ca5), 109.6 (Ca3), 107.9 (Ca7), 78.9 (CBoc), 72.3 (Cb1), 43.1 (Cb4), 42.9 (Ca9), 35.6 (Cb2), 34.4 (Ca10), 28.7 (Cb3), 28.6 (CBoc).

**HRMS-ESI (m/z)** calculated for C<sub>27</sub>H<sub>36</sub>N<sub>5</sub>O<sub>3</sub> [M+H]<sup>+</sup>: 478.2818; found: 478.2831.

**4-(2-(4-aminophenyl)ethylamino)-7-*O*-(piperidin-4-ylmethoxy)quinazoline (65'')**  
(34mg; 90μmol; yield 64%) from **65'** (67mg; 140μmol):

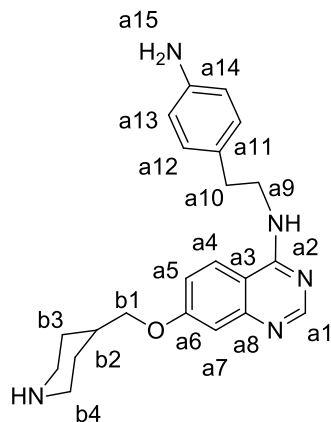

**<sup>1</sup>H NMR (500MHz, DMSO) δ** 8.40 (s, 1H, Ha1), 8.13 (brt, *J*=5.7Hz, 1H, HNH), 8.11 (d, *J*=9.6Hz, 1H, Ha4), 7.11 (dd, *J*=2.5, 9.1Hz, 1H, Ha5), 7.04 (d, *J*=2.6Hz, 1H, Ha7), 6.94-6.86 (m, 2H, Ha12), 6.52-6.46 (m, 2H, Ha13), 4.85 (s, 2H, Ha15), 3.94 (d, *J*=6.3Hz, 2H, Hb1), 3.66-3.59 (m, 2H, Ha9), 3.02-2.94 (m, 2H, Hb4eq), 2.76 (brt, *J*=7.3Hz, 2H, Ha10), 2.58-2.52 (m, 2H, Hb4ax), 1.94-1.83 (m, 1H, Hb2), 1.76-1.68 (m, 2H, Hb3eq), 1.26-1.15 (m, 2H, Hb3ax).

**<sup>13</sup>C NMR (125MHz, DMSO) δ** 162 (Ca6), 159.4 (Ca2), 156.1 (Ca1), 151.8 (Ca8), 147.2 (Ca14), 129.6 (Ca12), 129.3 (Ca11), 114.4 (Ca13), 124.7 (Ca4), 117.1 (Ca5), 109.6 (Ca3), 107.9 (Ca7), 72.3 (Cb1), 43.1 (Cb4), 42.9 (Ca9), 35.6 (Cb2), 34.4 (Ca10), 28.7 (Cb3).

**HRMS-ESI (m/z)** calculated for C<sub>22</sub>H<sub>28</sub>N<sub>5</sub>O [M+H]<sup>+</sup>: 378.2293; found: 378.2285.

**4-(2-(4-aminophenyl)ethylamino)-7-((1-(2-(quinolin-4-ylamino)ethyl) piperidin-4-yl)methoxy)quinazoline (65)** (7.0mg; 13μmol; yield 33%) from **65''** (15mg; 40μmol):

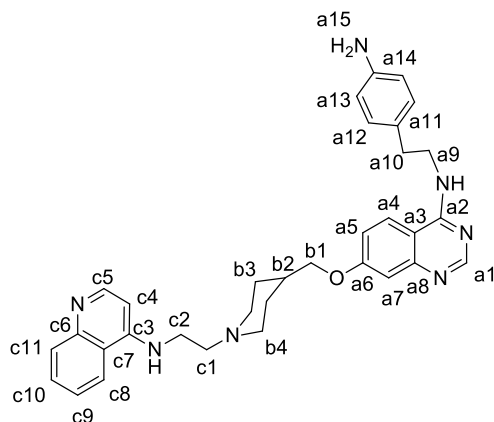

**<sup>1</sup>H NMR (500MHz, DMSO) δ** 8.42-8.36 (m, 2H, Ha1 et Hc5), 8.19-8.13 (m, 2H, HNH and Hc8), 8.12 (d, *J*=9.1Hz, 1H, Ha4), 7.78 (dd, *J*=0.9, 8.4Hz, 1H, Hc11), 7.61(m, 1H, Hc10), 7.43 (m, 1H, Hc9), 7.11 (dd, *J*=2.5, 8.9Hz, 1H, Ha5), 7.05 (d, *J*=2.5Hz, 1H, Ha7), 7.04 (brt, *J*=5.3Hz, 1H, HNH), 6.93-6.87 (m, 2H, Ha12), 6.52-6.48 (m, 2H, Ha13), 6.48 (d, *J*=5.4Hz, 1H, Hc4), 4.86 (s, 2H, Ha15), 3.98 (d, *J*=5.9Hz, 2H, Hb1), 3.67-3.58 (m, 2H, Ha9), 3.45-3.38 (m, 2H, Hc2), 3.05-2.97 (m, 2H, Hb4eq), 2.76 (brt, *J*=7.3Hz 2H, Ha10), 2.63 (t, *J*=6.8Hz, 2H, Hc1), 2.11-2.01 (m, 2H, Hb4ax), 1.84-1.75(m, 3H, Hb2 and Hb3eq), 1.45-1.31 (m, 2H, Hb3ax).

**<sup>13</sup>C NMR (125MHz, DMSO) δ** 162.2 (Ca6), 159.4 (Ca2), 156.2 (Ca1), 151.8 (Ca8), 151.2 (Cc5), 150.2 (Cc3), 148.7 (Cc6), 147.2 (Ca14), 129.5 (Ca12), 129.5 (Cc11), 129.1 (Cc10), 126.8 (Ca11), 124.7 (Ca4), 124.3 (Cc9), 121.9 (Cc8), 119.2 (Cc7), 117.2 (Ca5), 114.4 (Ca13), 109.6 (Ca3), 107.9 (Ca7), 98.7 (Cc4), 72.7 (Cb1), 56.6 (Cc1), 53.5 (Cb4), 42.9 (Ca9), 40.6 (Cc2), 35.7 (Cb2), 34.4 (Ca10), 29.0 (Cb3).

**HRMS-ESI (m/z)** calculated for C<sub>33</sub>H<sub>38</sub>N<sub>7</sub>O [M+H]<sup>+</sup>: 548.3137; found: 548.3142.

15

**4-(2-(4-sulfonamidophenyl)ethylamino)-7-(O-((N-Boc)piperidin-4-ylmethoxy))**

**quinazoline (66)** (53mg; 98μmol; yield 70%) from **52** (60mg; 140μmol).

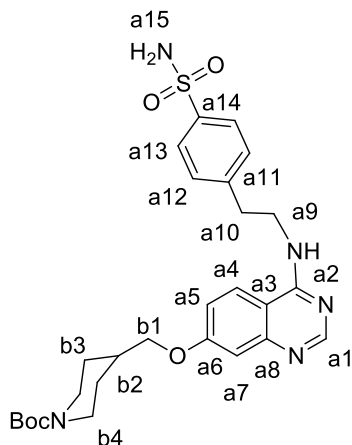

**<sup>1</sup>H NMR (500MHz, DMSO) δ** 8.42 (s, 1H, Ha1), 8.21 (brt, *J*=5.8Hz, 1H, HNH), 8.10 (d, *J*=9.1Hz, 1H, Ha4), 7.77-7.73 (m, 2H, Ha13), 7.47-7.43 (m, 2H, Ha12), 7.29 (brs, 2H, Ha15), 7.12 (dd, *J*=2.6, 9.1Hz, 1H, Ha5), 7.07 (d, *J*=2.5Hz, 1H, Ha7), 4.02-3.94 (m, 2H, Hb4eq), 3.99 (d, *J*=6.5Hz, 2H, Hb1), 3.76 (q, *J*=6.5Hz, 2H, Ha9), 3.04 (brt, *J*=7.4Hz, 2H, Ha10), 2.84-2.68 (m, 2H, Hb4ax), 2.02-1.92 (m, 1H, Hb2), 1.81-1.74 (m, 2H, Hb3eq), 1.41 (s, 9H, HBoc), 1.26-1.13 (m, 2H, Hb3ax).

**<sup>13</sup>C NMR (125MHz, DMSO) δ** 162.1 (Ca6), 159.4 (Ca2), 156.1 (Ca1), 154.3 (CBoc), 151.8 (Ca8), 144.3 (Ca11), 142.6 (Ca14), 129.6 (Ca12), 126.2 (Ca13), 124.6 (Ca4), 117.3 (Ca5), 109.6 (Ca3), 107.9 (Ca7), 78.9 (CBoc), 72.3 (Cb1), 42 (Ca9), 35.6 (Cb2), 34.7 (Ca10), 28.7 (Cb3), 28.6 (CBoc).

**HRMS-ESI (m/z)** calculated for C<sub>27</sub>H<sub>36</sub>N<sub>5</sub>O<sub>5</sub>S [M+H]<sup>+</sup>: 542.2437; found: 542.2445 .

**4-(2-(4-sulfonamidophenyl)ethylamino)-7-O-(piperidin-4-ylmethoxy) quinazoline (66'')** (33mg; 75μmol; yield 77%) from **66'** (53mg; 98μmol):

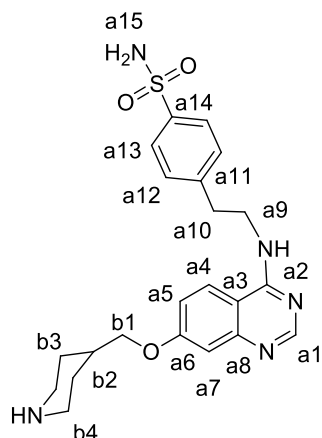

**<sup>1</sup>H NMR (500MHz, DMSO) δ** 8.42 (s, 1H, Ha1), 8.21 (brt, *J*=5.4Hz, 1H, HNH), 8.10 (d, *J*=9.1Hz, 1H, Ha4), 7.77-7.72 (m, 2H, Ha13), 7.47-7.42 (m, 2H, Ha12), 7.37-7.21 (brs, 2H, Ha15), 7.11 (dd, *J*=2.4, 9.0Hz, 1H, Ha5), 7.05 (d, *J*=2.5Hz, 1H, Ha7), 3.94 (d, *J*=6.5Hz, 2H, Hb1), 3.79-3.72 (m, 2H, Ha9), 3.04 (brt, *J*=7.1Hz, 2H, Ha10), 2.99-2.92 (m, 2H, Hb4eq), 2.63-2.52 (m, 2H, Hb4ax), 1.93-1.79 (m, 1H, Hb2), 1.76-1.66 (m, 2H, Hb3eq), 1.26-1.12 (m, 2H, Hb3ax).

**<sup>13</sup>C NMR (125MHz, DMSO) δ** 162.1 (Ca6), 159.4 (Ca2), 156.1 (Ca1), 151.8 (Ca8), 144.3 (Ca11), 142.6 (Ca14), 129.6 (Ca12), 126.2 (Ca13), 124.6 (Ca4), 117.3 (Ca5), 109.6 (Ca3), 107.9 (Ca7), 72.3 (Cb1), 43.2 (Cb4), 42 (Ca9), 35.6 (Cb2), 34.7 (Ca10), 28.7 (Cb3).

**HRMS-ESI (m/z)** calculated for C<sub>22</sub>H<sub>28</sub>N<sub>5</sub>O<sub>3</sub>S [M+H]<sup>+</sup>: 397.1795; found: 397.1794.

**4-(2-(4-sulfonamidophenyl)ethylamino)-7-((1-(2-(quinolin-4-ylamino)ethyl) piperidin-4-yl)methoxy)quinazoline (66)** (11mg; 18μmol; yield 52%) from **66''** (13mg; 34μmol):

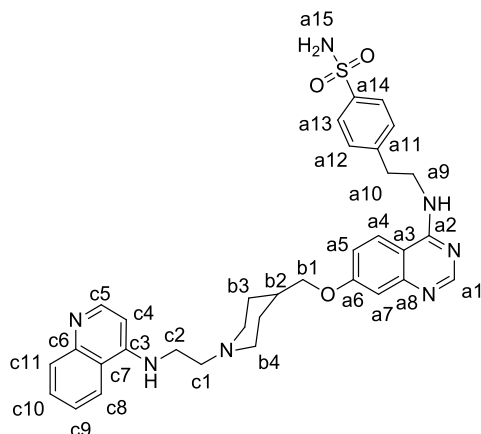

**<sup>1</sup>H NMR (500MHz, DMSO) δ** 8.43 (s, 1H, Ha1), 8.40 (d, *J*= 5.3Hz, 1H, Hc5), 8.21 (brt, *J*=5.5Hz, 1H, HNH), 8.16 (dd, *J*=0.8, 8.8Hz, 1H, Hc8), 8.11 (d, *J*=9.1Hz, 1H, Ha4), 7.78 (dd, *J*=1.1, 8.4Hz, 1H, Hc11), 7.76-7.72 (m, 2H, Ha13), 7.61(m, 1H, Hc10), 7.46-7.40 (m, 5H, Hc9, Ha12, Ha15), 7.12 (dd, *J*=2.6, 9.0Hz, 1H, Ha5), 7.07 (d, *J*=2.6Hz, 1H, Ha7), 7.04 (brt, *J*=5.5Hz, 1H, HNH), 6.48 (d, *J*=5.5Hz, 1H, Hc4), 3.99 (d, *J*=5.9Hz, 2H, Hb1), 3.79-3.73 (m, 2H, Ha9), 3.41 (q, *J*=6.4Hz, 2H, Hc2), 3.06-2.97 (m, 4H, Hb4eq, Ha10), 2.64 (t, *J*=7.2Hz, 2H, Hc1), 2.10-2.02 (m, 2H, Hb4ax), 1.84-1.77(m, 3H, Hb2 and Hb3eq), 1.38 (dq, *J*=2.6, 12.1Hz, 2H, Hb3ax).

**<sup>13</sup>C NMR (125MHz, DMSO) δ** 162.2 (Ca6), 159.4 (Ca2), 156.1 (Ca1), 151.8 (Ca8), 151.2 (Cc5), 150.2 (Cc3), 148.7 (Cc6), 144.1 (Ca11), 142.9 (Ca14), 129.5 (Ca12), 129.5 (Cc11), 129.1 (Cc10), 126.1 (Ca13), 124.6 (Ca4), 124.3 (Cc9), 121.9 (Cc8), 119.2 (Cc7), 117.3 (Ca5), 109.5 (Ca3), 107.9 (Ca7), 98.7 (Cc4), 72.7 (Cb1), 56.6 (Cc1), 53.5 (Cb4), 42.1 (Ca9), 40.6 (Cc2), 35.7 (Cb2), 34.7 (Ca10), 29 (Cb3).

**HRMS-ESI (m/z)** calculated for C<sub>33</sub>H<sub>38</sub>N<sub>7</sub>O<sub>3</sub>S [M+H]<sup>+</sup>: 612.2756; found: 612.2747.

**4-(2-(4-isopropylphenyl)ethylamino)-7-*O*-((*N*-Boc)piperidin-4-ylmethoxy)) quinazoline (67')** (44mg; 87μmol; yield 62%) from **52** (60mg; 140μmol):

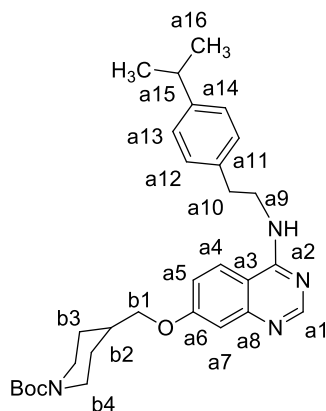

**<sup>1</sup>H NMR (500MHz, DMSO) δ** 8.41 (s, 1H, Ha1), 8.20 (brt, *J*=5.6Hz, 1H, HNH), 8.10 (d, *J*=9.1Hz, 1H, Ha4), 7.22-7.14 (m, 4H, Ha12 and Ha13), 7.11 (dd, *J*=2.6, 9.1Hz, 1H, Ha5), 7.06 (d, *J*=2.6Hz, 1H, Ha7), 4.0-3.96 (m, 2H, Hb4eq), 3.98 (d, *J*=6.4Hz, 2H, Hb1), 3.70 (q, *J*=5.9Hz, 2H, Ha9), 2.91 (brt, *J*=7.2Hz, 2H, Ha10), 2.85-2.67 (m, 3H, Hb4ax and Ha15), 2.03-1.91 (m, 1H, Hb2), 1.81-1.73 (m, 2H, Hb3eq), 1.41 (s, 9H, HBoc), 1.26-1.13 (m, 8H, Hb3ax and Ha16).

**<sup>13</sup>C NMR (125MHz, DMSO) δ** 162.1 (Ca6), 159.4 (Ca2), 156.1 (Ca1), 154.3 (CBoc), 151.7 (Ca8), 146.5 (Ca14), 137.3 (Ca11), 129.6 (Ca12), 129 (Ca13), 124.7 (Ca4), 117.3 (Ca5), 109.5 (Ca3), 107.9 (Ca7), 78.9 (CBoc), 72.3 (Cb1), 43.2 (Cb4), 42.2 (Ca9), 35.6 (Cb2), 34.8 (Ca10), 33.5 (Ca15), 28.8 (Cb3), 28.6 (CBoc), 24.4 (Ca16).

**HRMS-ESI (m/z)** calculated for C<sub>30</sub>H<sub>41</sub>N<sub>4</sub>O<sub>3</sub> [M+H]<sup>+</sup>: 505.3178; found: 505.3182.

**4-(2-(4-isopropylphenyl)ethylamino)-7-O-(piperidin-4-ylmethoxy)quinazoline (67'')**  
(34mg; 80μmol; yield 92%) from **67'** (44mg; 87μmol):



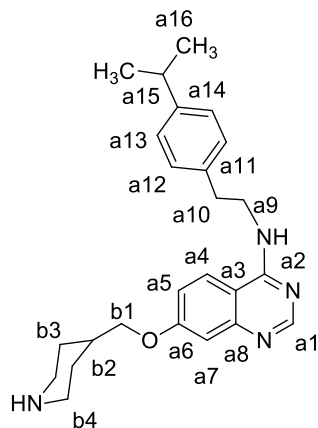

**<sup>1</sup>H NMR (500MHz, DMSO) δ** 8.41 (s, 1H, Ha1), 8.20 (brt, *J*=5.7Hz, 1H, HNH), 8.12 (d, *J*=9.2Hz, 1H, Ha4), 7.20-7.13 (m, 4H, Ha12,Ha13), 7.11 (dd, *J*=2.6, 9.0Hz, 1H, Ha5), 7.06 (d, *J*=2.7Hz, 1H, Ha7), 3.95 (d, *J*=6.4Hz, 2H, Hb1), 3.73-3.66 (m, 2H, Ha9), 3.05-2.97 (m, 2H, Hb4eq), 2.91 (brt, *J*=7.2Hz, 2H, Ha10), 2.85 (t, 1H, Ha15), 2.58-2.53 (m, 2H, Hb4ax), 1.95-1.84 (m, 1H, Hb2), 1.78-1.70 (m, 2H, Hb3eq), 1.29-1.10 (m, 8H, Hb3ax and Ha16).

**<sup>13</sup>C NMR (125MHz, DMSO) δ** 162.1 (Ca6), 159.4 (Ca2), 156.1 (Ca1), 151.7 (Ca8), 146.5 (Ca14), 137.3 (Ca11), 129.6 (Ca12), 129 (Ca13), 124.7 (Ca4), 117.3 (Ca5), 109.5 (Ca3), 107.9 (Ca7), 72.3 (Cb1), 43.2 (Cb4), 42.2 (Ca9), 35.6 (Cb2), 34.8 (Ca10), 33.5 (Ca15), 28.8 (Cb3), 24.4 (Ca16).

**HRMS-ESI (m/z)** calculated for C<sub>25</sub>H<sub>32</sub>N<sub>4</sub>O [M+H]<sup>+</sup>: 405.2654; found: 405.2659.

**4-(2-(4-isopropylphenyl)ethylamino)-7-((1-(2-(quinolin-4-ylamino)ethyl) piperidin-4-yl)methoxy)quinazoline (67)** (1.2mg; 2.0μmol; yield 6%) from **67''** (15mg; 37μmol):

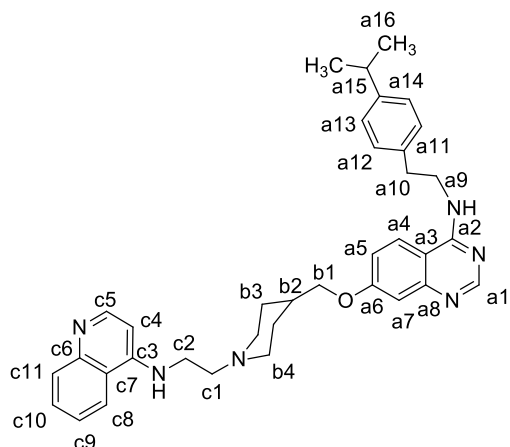

**<sup>1</sup>H NMR (500MHz, DMSO) δ** 8.41 (s, 1H, Ha1), 8.40 (d, *J*= 5.2Hz, 1H, Hc5), 8.22 (brt, *J*=5.9Hz, 1H, HNH), 8.16 (m, 1H, Hc8), 8.10 (d, *J*=9.3Hz, 1H, Ha4), 7.78 (dd, *J*=1.2, 8.4Hz, 1H, Hc11), 7.61(m, 1H, Hc10), 7.45-7.40 (m, 1H, Hc9), 7.20-7.09 (m, 4H, Ha12, Ha13), 7.12 (dd, *J*=2.6, 9.1Hz, 1H, Ha5), 7.06 (d, *J*=2.2Hz, 1H, Ha7), 7.04 (brt, *J*=5.3Hz, 1H, HNH), 6.48 (d, *J*=5.4Hz, 1H, Hc4), 3.99 (d, *J*=5.8Hz, 2H, Hb1), 3.73-3.68 (m, 2H, Ha9), 3.44-3.38 (m, 2H, Hc2), 3.04-2.98 (m, 2H, Hb4eq), 2.91 (brt, 2H, Ha10), 2.85 (t, 1H, Ha15), 2.66-2.61 (m, 2H, Hc1), 2.10-2.02 (m, 2H, Hb4ax), 1.83-1.77 (m, 3H, Hb2 and Hb3eq), 1.38 (m, 2H, Hb3ax), 1.18 (d, 6H, Ha16).

**<sup>13</sup>C NMR (125MHz, DMSO) δ** 162.2 (Ca6), 159.4 (Ca2), 156.1 (Ca1), 151.8 (Ca8), 151.2 (Cc5), 150.2 (Cc3), 148.7 (Cc6), 146.5 (Ca14), 137.4 (Ca11), 129.5 (Ca12), 129.3 (Ca13), 129.1 (Cc11), 129.1 (Cc10), 124.6 (Ca4), 124.3 (Cc9), 121.9 (Cc8), 119.2 (Cc7), 117.2 (Ca5), 109.6 (Ca3), 107.9 (Ca7), 98.7 (Cc4), 72.7 (Cb1), 56.6 (Cc1), 53.5 (Cb4), 42.5 (Ca9), 40.6 (Cc2), 35.7 (Cb2), 34.7 (Ca10), 33.5 (Ca15), 29 (Cb3), 24.4 (Ca16).

**HRMS-ESI (m/z)** calculated for C<sub>36</sub>H<sub>43</sub>N<sub>6</sub>O [M+H]<sup>+</sup>: 575.3498; found: 575.3496.

**4-([1,1'-biphenyl]-4-ylmethlamino)-7-O-((N-Boc)piperidin-4-ylmethoxy)quinazoline**

(**68'**) (60mg; 114 $\mu$ mol; yield 95%) from **52** (52mg; 120 $\mu$ mol).

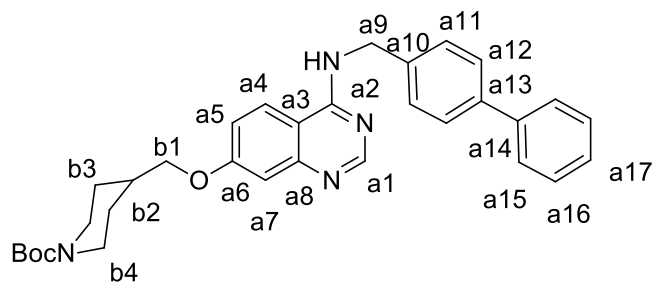

**<sup>1</sup>H NMR (500MHz, DMSO)  $\delta$**  8.71 (t,  $J$ =6.0Hz, HNH), 8.40 (s, 1H, Ha1), 8.23 (d,  $J$ =9.2Hz, 1H, Ha4), 7.68-7.59 (m, 4H, Ha15 and Ha12), 7.49-7.42 (m, 4H, Ha11 and Ha16), 7.39-7.34 (m, 2H, Ha17 and HNH), 7.15 (dd,  $J$ =2.6, 9.1Hz, 1H, Ha5), 7.10 (d,  $J$ =2.6Hz, 1H, Ha7), 4.81 (d,  $J$ =5.9Hz, 2H, Ha9), 4.06-3.93 (m, 2H, Hb1 and Hb4eq), 2.89-2.66 (m, 2H, Hb4ax), 2.05-1.95 (m, 1H, Hb2), 1.84-1.73 (m, 2H, Hb3eq), 1.41 (s, 9H, HBoc), 1.28-1.15 (m, 2H, Hb3ax).

10

**<sup>13</sup>C NMR (125MHz, DMSO)  $\delta$**  162.3 (Ca6), 159.3 (Ca2), 151.7 (Ca1), 154.4 (CBoc), 151.8 (Ca8), 140.2 (Ca14), 139.8 (Ca13), 137.5 (Ca10), 129.4 (Ca16), 128.6 (Ca11), 128.0 (Ca17), 127.3 (Ca12), 127.1 (Ca15), 124.7 (Ca4), 117.8 (Ca5), 109.7 (Ca3), 107.5 (Ca7), 78.9 (CBoc), 72.5 (Cb1), 44.9 (Ca9), 43.2 (Cb4), 33.3 (Cb2), 28.9 (CBoc), 28.6 (Cb3).

15 **HRMS-ESI(m/z)** calculated for C<sub>32</sub>H<sub>37</sub>N<sub>4</sub>O<sub>3</sub> [M+H]<sup>+</sup> : 525.2860; found: 525.2835

**4-([1,1'-biphenyl]-4-ylmethlamino)-7-O-(piperidin-4-ylmethoxy)quinazoline (**68''**)**

(48mg; 114 $\mu$ mol; quantitative yield) from **68'** (60mg; 114 $\mu$ mol):

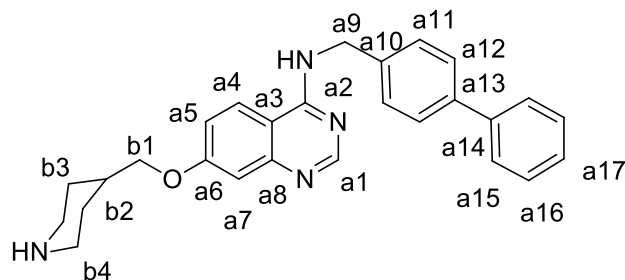

TFA salt

**<sup>1</sup>H NMR (500MHz, DMSO) δ** 8.82 (s, 1H, Ha1), 8.63-8.62 (m, 1H, HNH), 8.47 (d, *J*=9.2Hz, 1H, Ha4), 7.69-7.61 (m, 4H, Ha15 and Ha12), 7.54-7.43 (m, 4H, Ha11 and Ha16),  
 5 7.42-7.33 (m, 2H, Ha17 and Ha5), 7.29 (d, *J*=2.4Hz, 1H, Ha7), 4.96 (d, *J*=5.8Hz, 2H, Ha9),  
 4.08 (d, *J*=6.3Hz, 2H, Hb1), 3.35 (m, 4H, Ha9 and Hb4eq), 2.95 (brd, *J*=11.4Hz, 2H, Hb4ax),  
 2.21-2.10 (m, 1H, Hb2), 2.00-1.91 (m, 2H, Hb3eq), 1.60-1.44 (m, 2H, Hb3ax).

**<sup>13</sup>C NMR (125MHz, DMSO) δ** 164.0 (Ca6), 160.3 (Ca2), 152.6 (Ca1), 156.7 (Ca8), 140.3  
 (Ca14), 139.8 (Ca13), 137.5 (Ca10), 129.5 (Ca16), 128.6 (Ca11), 128.0 (Ca17), 127.3 (Ca12),  
 10 127.1 (Ca15), 126.5 (Ca4), 118.8 (Ca5), 107.7 (Ca3), 102.8 (Ca7), 72.5 (Cb1), 44.7 (Ca9), 43.2  
 (Cb4), 33.3 (Cb2), 25.6 (Cb3).

**HRMS-ESI(m/z)** calculated for C<sub>27</sub>H<sub>29</sub>N<sub>4</sub>O [M+H]<sup>+</sup> : 425.2336; found: 425.2355

**4-([1,1'-biphenyl]-4-ylmethylamino)-7-((1-(2-(quinolin-4-ylamino)ethyl)  
 15 piperidin-4-yl)methoxy)quinazoline (68)** (10mg; 17μmol; yield 31%) from **68''** (24mg;  
 56μmol).

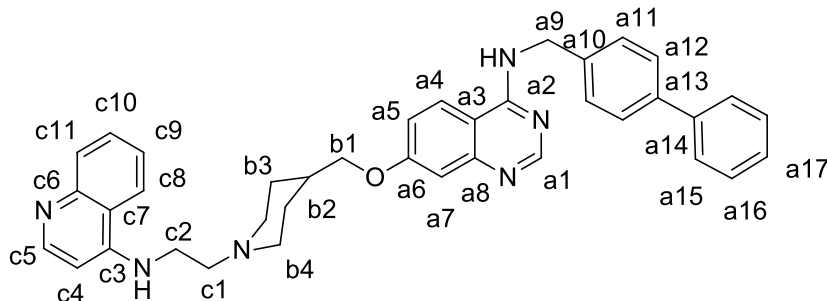

**<sup>1</sup>H NMR (500MHz, CDCl<sub>3</sub>)**  $\delta$  8.67 (s, 1H, Ha1), 8.57 (d,  $J$ =5.3Hz, 1H, Hc5), 8.08 (d,  $J$ =8.2Hz, 1H, Hc8), 7.81 (dd,  $J$ =8.2Hz, 1H, Hc11), 7.70 (ddd,  $J$ =1.2, 6.9, 8.2Hz, 1H, Hc10), 7.46 (ddd,  $J$ =1.1, 6.8, 8.2Hz, 1H, Hc9), 7.66-7.58 (m, 5H, Ha4 and Ha15 and Ha12), 7.56-7.43 (m, 4H, Ha11 and Ha16), 7.38 (m, 1H, Ha17), 7.20 (d,  $J$ =2.6Hz, 1H, Ha7), 7.08 (dd,  $J$ =2.6, 9.2Hz, 1H, Ha5), 6.43 (d,  $J$ =5.3Hz, 1H, Hc4), 6.40 (brs, 1H, HNH), 5.93 (brt,  $J$ =5.4Hz, 1H, HNH), 4.92 (d,  $J$ =5.3Hz, 2H, Ha9), 4.01 (d,  $J$ =6.0Hz, 2H, Hb1), 3.70 (q,  $J$ =7.2Hz, 2H, Ha9), 3.41 (brq,  $J$ =4.3Hz, 2H, Hc2), 3.00 (brd,  $J$ =11.5Hz, 2H, Hb4eq), 2.84 (t,  $J$ =5.9Hz, 2H, Hc1), 2.20 (dt,  $J$ =2.0, 12.0Hz, 2H, Hb4ax), 2.05-1.91 (m, 3H, Hb2 and Hb3eq), 1.52 (dq,  $J$ =2.4, 12.5Hz, 2H, Hb3ax).

**<sup>13</sup>C NMR (125MHz, CDCl<sub>3</sub>)**  $\delta$  162.4 (Ca6), 159.0 (Ca2), 156.0 (Ca1), 151.7 (Ca8), 150.8 (Cc3), 149.2 (Cc5), 146.1 (Cc6), 140.8 (Ca14), 140.6 (Ca13), 137.3 (Ca10), 129.9 (Cc10), 128.8 (Ca16), 128.5 (Ca11), 128.1 (Cc8), 127.6 (Ca12), 127.4 (Ca17), 127.1 (Ca15), 125.2 (Cc9), 122.0 (Ca4), 119.7 (Cc11), 118.4 (Cc7), 118.2 (Ca5), 109.0 (Ca3), 107.9 (Ca7), 98.7 (Cc4), 72.6 (Cb1), 55.7 (Cc1), 52.9 (Cb4), 45.0 (Ca9), 39.1 (Cc2), 35.6 (Cb2), 29.2 (Cb3).

**HRMS-ESI(m/z)** calculated for C<sub>38</sub>H<sub>39</sub>N<sub>6</sub>O [M+H]<sup>+</sup> : 595.3180; found: 595.3172.

**4-(3-(naphthalen-1-yl)propylamino)-7-(*O*-((*N*-Boc) piperidin-4-ylmethoxy)) quinazoline**

(**69'**) (60mg; 112μmol; 95%) from **52** (52mg; 120μmol).

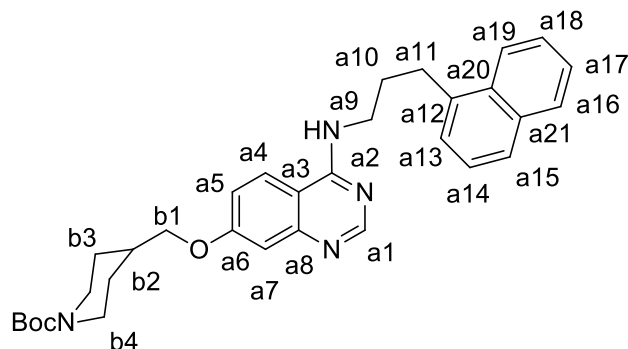

**<sup>1</sup>H NMR (500 MHz ; DMSO) δ** 8.39 (s, 1H, Ha1), 8.16 (m, 2H, Ha4 and HNH), 8.10-8.06 (m, 1H, Ha16), 7.94-7.90 (m, 1H, Ha19), 7.80-7.75 (m, 1H, Ha15), 7.53-7.48 (m, 2H, Ha17 and Ha18), 7.46-7.40 (m, 2H, H13 and H14), 7.11 (dd, *J*=2.6, 8.7 Hz, 1H, Ha5), 7.05 (d, *J*=2.6Hz, 1H, Ha7), 8.51 (s, 1H, Ha1), 8.42 (brt, *J*=5.1 Hz, 1H, HNH), 8.14 (d, *J*=9.2 Hz, 1H, Ha19), 8.09 (d, *J*=7.8Hz, 1H, Ha4), 7.76 (dd, *J*=1.8, 6.9Hz, 1H, Ha15), 7.46-7.35 (m, 2H, Ha17 and Ha18), 7.31 (t, *J*=7.9Hz, 1H, Ha13), 7.15 (dd, *J*=2.5, 9.1 Hz, 1H, Ha5), 7.11 (d, *J*=8.1Hz, 1H, Ha14), 7.08 (d, *J*=2.6Hz, 1H, Ha7), 6.71(d, *J*=7.5Hz, 1H, Ha12), 6.45 (brt, *J*=5.1Hz, HNH), 4.05-3.91 (m, 4H, Hb1 and Hb4eq), 3.85 (q, *J*=6.3Hz, 2H, Ha9), 3.51 (brt, *J*=6.1Hz, 2H, Ha10), 2.87-2.67 (m, 2H, Hb4ax), 1.98-1.92 (m, 1H, Hb2), 1.81-1.72 (m, 2H, Hb3eq), 1.25-1.15 (m, 2H, Hb3ax).

**<sup>13</sup>C NMR (125MHz; DMSO) δ** 162.2 (Ca6), 159.8 (Ca2), 155.9 (Ca1), 154.3 (Ca8), 151.5 (Ca11), 144.3 (Ca11), 134.5 (Ca21), 128.4 (Ca15), 127.6 (Ca13), 126.1 (Ca17), 124.8 (Ca19), 124.7 (Ca4), 124.5 (Ca18), 123.3 (Ca20), 121.8 (Ca4), 117.4 (Ca5), 115.8 (Ca14), 109.5 (Ca3), 107.8 (Ca7), 103.3 (Ca12), 79.0 (CBoc), 72.1 (Cb1), 46.2 (Cb4), 43.2 (Ca10), 39.4 (Ca9), 35.6 (Cb2), 28.7 (Cb3), 28.6 (CBoc).

**HRMS-ESI (m/z)** calculated for C<sub>32</sub>H<sub>39</sub>N<sub>4</sub>O<sub>3</sub> [M+H]<sup>+</sup> : 527.3017; found: 527.3008.

**4-(3-(naphthalen-1-yl)propylimino)-7-O-(piperidin-4-ylmethoxy)quinazoline (69'')**

(39mg; 91μmol; 96%) from **69''** (50mg; 95μmol).

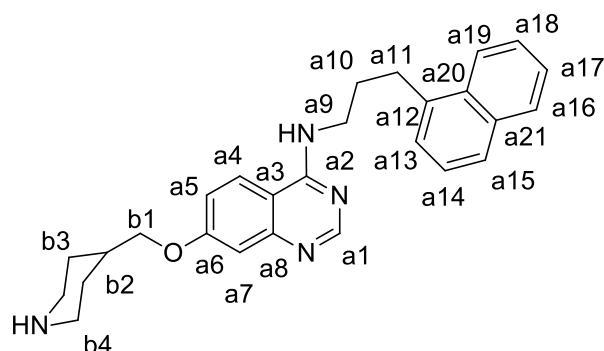

5

**<sup>1</sup>H NMR (500 MHz ; DMSO) δ** 8.39 (s, 1H, Ha1), 8.16 (m, 2H, Ha4 and HNH), 8.10-8.06 (m, 1H, Ha16), 7.94-7.90 (m, 1H, Ha19), 7.80-7.75 (m, 1H, Ha15), 7.53-7.48 (m, 2H, Ha17 and Ha18), 7.46-7.40 (m, 2H, H13 and H14), 7.11 (dd, *J*=2.6, 8.7 Hz, 1H, Ha5), 7.05 (d, *J*=2.6Hz, 1H, Ha7), 3.93 (d, *J*=6.4Hz, 2H, Hb1), 3.63 (q, *J*=6.6Hz, 2H, Ha9), 3.17 (brt, *J*=8.4Hz, 2H, Ha11), 3.00-2.93 (m, 2H, Hb4eq), 2.50-2.44 (m, 2H, Hb4ax), 2.06 (quint, *J*=7.5Hz, 2H, Ha10), 1.91-1.81 (m, 1H, Hb2), 1.75-1.67 (m, 2H, Hb3eq), 1.26-1.14 (m, 2H, Hb3ax).

**<sup>13</sup>C NMR (125MHz; DMSO) δ** 162.1 (Ca6), 159.5 (Ca2), 156.1 (Ca1), 151.8 (Ca8), 138.3 (Ca12), 133.9 (Ca20), 131.8 (Ca21), 129.0 (Ca19), 126.9 (Ca15), 126.3 (Ca17 and Ca18), 126.1 (Ca13 and Ca14), 124.7 (Ca4), 124.1 (Ca16), 117.2 (Ca5), 109.5 (Ca3), 107.9 (Ca7), 73.1 (Cb1), 46.1 (Cb4), 40.8 (Ca9), 36.3 (Cb2), 30.2 (Ca10 and Ca11), 29.9 (Cb3).

15

**HRMS-ESI (m/z)** calculated for C<sub>27</sub>H<sub>31</sub>N<sub>4</sub>O [M+H]<sup>+</sup>: 427.2492; found: 427.2493

**4-(2-(naphthalen-1-yl)propyl)-7-((1-(2-(quinolin-4-ylamino)ethyl) piperidin-4-yl)methoxy)quinazoline (69)** (10mg; 17 $\mu$ mol; 48%) from **69''** (15mg; 35 $\mu$ mol).

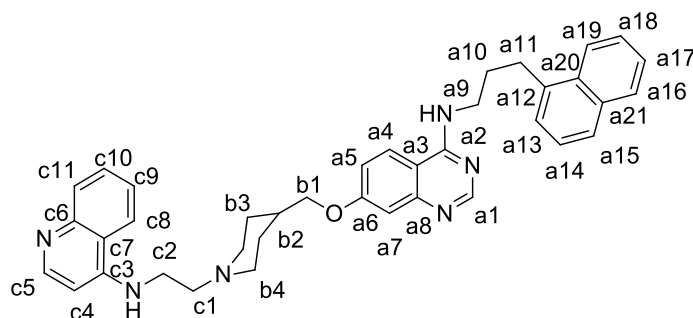

5 **<sup>1</sup>H NMR (500 MHz ; DMSO)  $\delta$**  8.40 (d,  $J$ = 5.4Hz, 1H, Hc5), 8.39 (s, 1H, Ha1), 8.20-8.14 (m, 3H, Hc8, Ha4 and HNH), 8.10-8.06 (m, 1H, Ha16), 7.94-7.90 (m, 1H, Ha19), 7.80-7.75 (m, 1H, Hc11 and Ha15), 7.61 (ddd,  $J$ =1.3, 6.9, 8.6Hz, 1H, Hc10), 7.53-7.49 (m, 2H, Ha17 and Ha18), 7.45-7.39 (m, 3H, Hc9, Ha13 and Ha14), 7.27 (brt,  $J$ =5.6Hz, 1H, HNH), 7.10 (dd,  $J$ =2.6, 9.4Hz, 1H, Ha5), 7.04 (d,  $J$ =2.6Hz, 1H, Ha7), 6.56 (d,  $J$ =5.3Hz, 1H, Hc4), 4.28-4.21 (m, 2H, Hc1), 4.06-3.98 (m, 2H, Hb4eq), 3.93 (d,  $J$ =6.3Hz, 2H, Hb1), 3.63 (q,  $J$ =6.6Hz, 2H, Ha9), 3.44 (q,  $J$ =5.7Hz, 2H, Hc2), 3.17 (brt,  $J$ =8.0Hz, 2H, Ha11), 2.12-2.04 (m, 4H, Ha10 and Hb4ax), 1.89-1.75 (m, 1H, Hb2 and Hb3eq), 1.45-1.30 (m, 2H, Hb3ax).

10

**<sup>13</sup>C NMR (125MHz; DMSO)  $\delta$**  162.1 (Ca6), 159.5 (Ca2), 156.1 (Ca1), 151.8 (Ca8), 151.2 (Cc5), 150.2 (Cc3), 148.7 (Cc6), 138.2 (Ca12), 133.9 (Ca20), 131.8 (Ca21), 129.5 (Cc11), 129.1 (Cc10), 129.0 (Ca19), 126.9 (Ca15), 126.3 (Ca17 and Ca18), 126.1 (Ca13 and Ca14), 124.7 (Ca4), 124.1 (Ca16), 122.0 (Cc9), 119.2 (Cc7), 117.2 (Ca5), 109.5 (Ca3), 107.9 (Ca7),

15



98.7 (Cc4), 72.7 (Cb1), 63.3 (Cc1), 53.5 (Cb4), 40.8 (Ca9), 40.4 (Cc2), 35.7 (Cb2), 30.2 (Ca10 and Ca11), 29.0 (Cb3).

**HRMS-ESI (m/z)** calculated for C<sub>38</sub>H<sub>41</sub>N<sub>6</sub>O [M+H]<sup>+</sup>: 597.3336; found: 597.3333.

- 5      **4-(2-(naphtylamino)ethylamino)-7-(*O*-((*N*-Boc) piperidin-4-ylmethoxy)) quinazoline**  
**(70')** (59mg; 112μmol; yield 79%) from **52** (60mg; 140μmol):

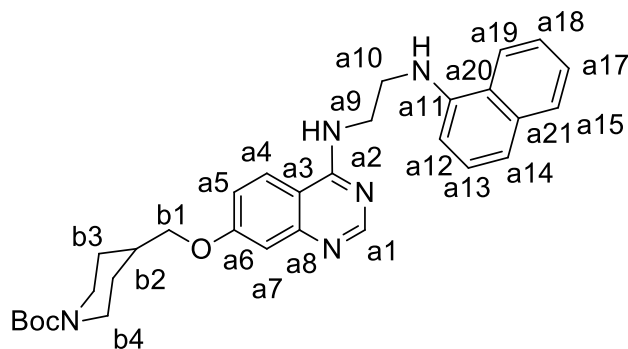

**<sup>1</sup>H NMR (500MHz, DMSO) δ** 8.51 (s, 1H, Ha1), 8.42 (brt, *J*=5.1Hz, 1H, HNH), 8.14 (d, *J*=9.2Hz, 1H, Ha19), 8.09 (d, *J*=7.8Hz, 1H, Ha4), 7.76 (dd, *J*=1.8, 6.9Hz, 1H, Ha15), 7.46-7.35 (m, 2H, Ha17 and Ha18), 7.31 (t, *J*=7.9Hz, 1H, Ha13), 7.15 (dd, *J*=2.5, 9.1Hz, 1H, Ha5), 7.11 (d, *J*=8.1Hz, 1H, Ha14), 7.08 (d, *J*=2.6Hz, 1H, Ha7), 6.71(d, *J*=7.5Hz, 1H, Ha12), 6.45 (brt, *J*=5.1Hz, HNH), 4.05-3.91 (m, 4H, Hb1 and Hb4eq), 3.85 (q, *J*=6.3Hz, 2H, Ha9), 3.51 (brt, *J*=6.1Hz, 2H, Ha10), 2.87-2.67 (m, 2H, Hb4ax), 1.98-1.92 (m, 1H, Hb2), 1.81-1.72 (m, 2H, Hb3eq), 1.25-1.15 (m, 2H, Hb3ax).

15      **<sup>13</sup>C NMR (125MHz, DMSO) δ** 162.2 (Ca6), 159.8 (Ca2), 155.9 (Ca1), 154.3 (Ca8), 151.5 (Ca11), 144.3 (Ca11), 134.5 (Ca21), 128.4 (Ca15), 127.6 (Ca13), 126.1 (Ca17), 124.8 (Ca19), 124.7 (Ca4), 124.5 (Ca18), 123.3 (Ca20), 121.8 (Ca4), 117.4 (Ca5), 115.8 (Ca14), 109.5 (Ca3),

107.8 (Ca7), 103.3 (Ca12), 79.0 (CBoc), 72.1 (Cb1), 46.2 (Cb4), 43.2 (Ca10), 39.4 (Ca9), 35.6 (Cb2), 28.7 (Cb3), 28.6 (CBoc).

**HRMS-ESI (m/z)** calculated for C<sub>31</sub>H<sub>38</sub>N<sub>5</sub>O<sub>3</sub> [M+H]<sup>+</sup>: 528.2969; found: 528.3002.

- 5      **4-(2-(naphtylamino)ethylamino)-7-O-(piperidin-4-ylmethoxy)quinazoline (70'')** (47mg; 110μmol; yield 91%) from **70'** (64mg; 121μmol):

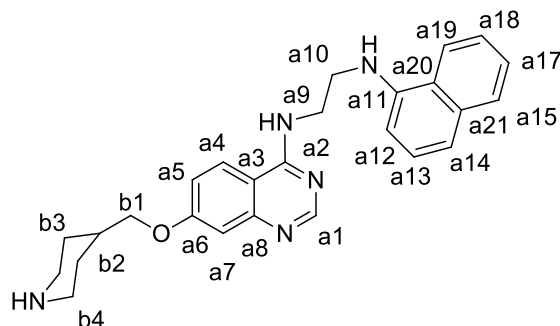

**<sup>1</sup>H NMR (500MHz, DMSO) δ** 8.50 (s, 1H, Ha1), 8.38 (brt, *J*=5.05 Hz, 1H, HNH), 8.12 (d, *J*=9.16Hz, 1H, Ha19), 8.11 (d, *J*=7.6Hz, 1H, Ha4), 7.76 (dd, *J*=1.6, 7.1Hz, 1H, Ha15), 7.47-7.38 (m, 2H, Ha17 and Ha18), 7.31 (t, *J*=7.9Hz, 1H, Ha13), 7.15 (dd, *J*=2.8, 9.1Hz, 1H, Ha5), 7.11 (d, *J*=8.4Hz, 1H, Ha14), 7.08 (d, *J*=2.5Hz, 1H, Ha7), 6.71(d, *J*=7.6Hz, 1H, H12), 6.46 (brt, *J*=5.3Hz, 1H, HNH), 3.96 (d, *J*=6.8Hz, 2H, Hb1), 3.85 (q, *J*=6.8Hz, 2H, Ha9), 3.51 (brt, *J*=6.8Hz, 2H, Ha10), 3.07-3.00 (m, 2H, Hb4eq), 2.62-2.54 (m, 2H, Hb4ax), 1.97-1.96 (m, 1H, Hb2), 1.81-1.71 (m, 2H, Hb3eq), 1.31-1.20 (m, 2H, Hb3ax).

15      **<sup>13</sup>C NMR (125MHz, DMSO) δ** 162.3 (Ca6), 159.8 (Ca2), 156.0 (Ca1), 151.9 (Ca8), 151.8 (Ca11), 144.3 (Ca11), 134.5 (Ca21), 128.4 (Ca15), 127.3 (Ca13), 126.1 (Ca17), 124.7 (Ca19), 124.5 (Ca4), 124.4 (Ca18), 123.3 (Ca20), 121.9 (Ca4), 117.4 (Ca5), 115.8 (Ca14), 109.5 (Ca3),

108.0 (Ca7), 103.2 (Ca12), 72.9 (Cb1), 45.6 (Cb4), 43.2 (Ca10), 39.7 (Ca9), 35.8 (Cb2), 29.2 (Cb3).

**HRMS-ESI (m/z)** calculated for C<sub>26</sub>H<sub>30</sub>N<sub>5</sub>O [M+H]<sup>+</sup>: 428.2445; found: 428.2610.

5      **4-(2-(naphthalen-1-yl)ethylamino)-7-((1-(2-(quinolin-4-ylamino)ethyl) piperidin-4-yl)methoxy)quinazoline (70)** (13mg; 22μmol; 63%) from **70''** (15mg; 35μmol):

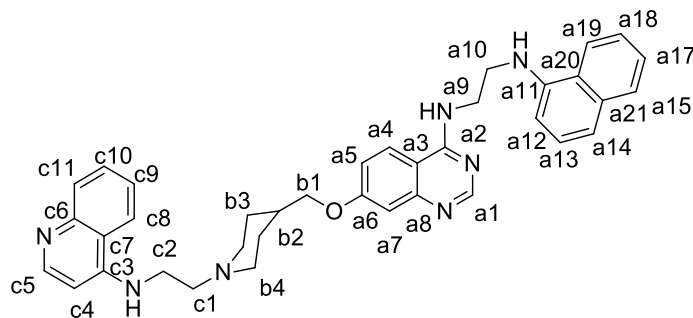

**<sup>1</sup>H NMR (500MHz, DMSO) δ** 8.50 (s, 1H, Ha1), 8.40 (d, *J*= 5.3Hz, 1H, Hc5), 8.38 (brt, *J*=5.6Hz, 1H, HNH), 8.16 (d, *J*=7.9Hz, 1H, Hc8), 8.14 (d, *J*=9.4Hz, 1H, Ha19), 8.11 (d, *J*=8.0Hz, 1H, Ha4), 7.79 (d, *J*=8.4Hz, 1H, Hc11), 7.75 (dd, *J*=1.8, 7.5Hz, 1H, Ha15), 7.61(ddd, *J*=0.8, 6.5, 7.7Hz, 1H, Hc10), 7.45-7.38 (m, 3H, Ha17, Hc9 and Ha18), 7.31 (t, *J*=7.9Hz, 1H, Ha13), 7.15 (dd, *J*=2.7, 9.3Hz, 1H, Ha5), 7.11 (d, *J*=7.8Hz, 1H, Ha14), 7.09 (d, *J*=2.6Hz, 1H, Ha7), 7.04 (brt,*J*=5.2Hz, 1H, HNH), 6.70(d, *J*=7.8Hz, 1H, Ha12), 6.48-45 (m, 2H, Hc4 and HNH), 3.99 (d, *J*=5.9Hz, 2H, Hb1), 3.86 (q, *J*=6.0Hz, 2H, Ha9), 3.51 (q, *J*=6.0Hz, 2H, Ha10), 3.41 (q, *J*=6.3Hz, 2H, Hc2), 3.05-2.97 (m, 2H, Hb4eq), 2.66-2.60 (m, 2H, Hc1), 2.10-2.02 (t, *J*=6.9Hz, 2H, Hb4ax), 1.85-1.75 (m, 3H, Hb3eq and Hb2), 1.43-1.31 (m, 2H, Hb3ax).

**<sup>13</sup>C NMR (125MHz, DMSO) δ** 162.3 (Ca6), 159.8 (Ca2), 156.0 (Ca1), 151.8 (Ca8), 151.2 (Cc5), 150.2 (Cc3), 148.7 (Cc6), 144.4 (Ca11), 134.5 (Ca21), 129.5 (Cc11), 129.1 (Cc10), 128.4 (Ca15), 127.3 (Ca13), 126.0 (Ca17), 124.7 (Ca19), 124.4 (Ca4), 124.3 (Ca18), 123.3 (Ca20), 121.9 (Ca4), 121.8 (Cc9), 119.2 (Cc7), 117.4 (Ca5), 115.8 (Ca14), 109.5 (Ca3), 108.0  
5 (Ca7), 103.2 (Ca12), 98.7 (Cc4), 72.7 (Cb1), 56.6 (Cc1), 53.5 (Cb4), 43.2 (Ca10), 40.6(Hc2), 39.7 (Ca9), 35.7 (Cb2), 29.0 (Cb3).

**HRMS-ESI (m/z)** calculated for C<sub>37</sub>H<sub>40</sub>N<sub>7</sub>O [M+H]<sup>+</sup>: 598.32893; found: 598.3295.

## Biological assays

### Enzymatic assays

**DNMT3A assay.** DNMT3A enzyme inhibition was adapted from the restriction-based fluorescence assay protocol described by (1) and described in (2). Briefly, a 5'-labelled biotin oligonucleotide was hybridized to its complementary strand labelled with 6-carboxyfluorescein at the 3'-end and transferred into a 384-well microplate (black Optiplates; PerkinElmer) pre-coated with avidin. The duplex contains a unique CpG site overlapping with a restriction site of a methylation-sensitive restriction enzyme. The human C-terminal DNMT3A (a.a. 623-908), produced as described, was added to each well (200 ng/well) and mixed with the chemical compounds at the desired concentration and freshly prepared AdoMet (20 mM final concentration) to start the reaction in a total volume of 50 mL. After incubation at 37°C (1h), each well was washed three times with phosphate-buffered saline (PBS) containing 0.05% Tween-20 and NaCl (500 mM) and three more times with phosphate-buffered saline Tween-20 (PBST). Specific fluorescence signals were detected with the methylation-sensitive restriction enzyme HpyCH4IV (New England Biolabs, Ipswich, MA, USA) as described, and measured on a PerkinElmer Envision detector. The percent inhibition was calculated according to Equation (1), where X is the signal determined in the absence of the inhibitor and Y is the signal obtained in the presence of the inhibitor.

Equation (1): 
$$\% \text{ inh.} = [(X-Y)/X] \times 100$$

The ligand concentration at which 50% inhibition of enzyme activity is observed (EC<sub>50</sub>) was determined by analysis of a concentration range of the test compounds in triplicates. Nonlinear

regression fittings with sigmoidal dose–response (variable slope) were performed with Prism 4.03 (GraphPad Software, Inc., La Jolla, CA, USA).

***DNMT1 assay.*** His-DNMT1 (182 kDa, human) was cloned, expressed and purified as

5 described. The assays were performed as described by (3). The reaction was performed in a total reaction volume of 10  $\mu$ L in low-volume nonbinding surface (NBS) 384-well microplates (Corning Inc.), containing test compound (up to 1% DMSO), 1  $\mu$ M of a S-adenosyl-lmethionine (SAM)/[methyl- $^3$ H]SAM (3 TBqmmol $^{-1}$ , PerkinElmer) mix in a ratio of 3:1 (isotopic dilution 1\*:3), 0.3  $\mu$ M of biotinylated hemimethylated DNA duplex and 90 nM of  
10 DNMT1 in methylation buffer (20 mM HEPES (pH 7.2), 1 mM EDTA, 50 mM KCl, 25  $\mu$ g/mL of bovine serum albumin). The reaction was incubated at 37°C for 2 h, then an aliquot (8  $\mu$ L) was transferred into a streptavidin 96- well scintillant-coated FlashPlate (PerkinElmer) containing 20  $\mu$ M S-adenosyl-L-homocysteine (SAH; 190  $\mu$ L) in 50 mM Tris-HCl (pH 7.4). The FlashPlate was agitated at RT for 1 h, washed three times with 200  $\mu$ L of 0.05% Tween-20  
15 in 50 mM Tris-HCl (pH 7.4), and read in 200  $\mu$ L of 50mM Tris-HCl (pH 7.4) on TopCount NXT (PerkinElmer).

The ligand concentration at which 50% inhibition of enzyme activity is observed (EC50) was determined by analysis of a concentration range of the test compounds in triplicates. Nonlinear regression fittings with sigmoidal dose–response (variable slope) were performed with Prism  
20 4.03 (GraphPad Software, Inc., La Jolla, CA, USA).

### **Antiproliferative activity.**

KG-1 and Karpas299 human leukemia cells were obtained from the ATCC (USA) and cultivated in RPMI 1640 medium (with HEPES and Glutamine, BE12-115F, Lonza, France) supplemented with, respectively, 20% and 15% foetal calf serum (Lonza, France), at 37°C and  
5 under 5% CO<sub>2</sub>. To measure the antiproliferative properties of tested molecules, 2x10<sup>4</sup> cells were seeded at day 0 in a 96-well plate. The compounds to be tested, stored at -20°C as 10<sup>-2</sup> M stock solution in 100% DMSO, are freshly diluted on day 1 in RPMI 1640 medium, before adding a dose range of 3.2nM to 10µM to the cells. This treatment is repeated on day 2 and 3, and on day 4 cell viability is assessed using the ATPLite kit from Perkin (ATPlite are Step  
10 Luminescence Assay System, ref 3016739), following the provider instructions. The raw data are analyzed with GraphPad Prism software (v4.03) to generate EC<sub>50</sub> values corresponding to the compound concentrations giving 50% reduction in cell viability (using nonlinear regression: sigmoidal dose-response (variable slope)). The values presented are the mean results of at least two independent experiments. The 95% confidence intervals for these EC<sub>50</sub> values are also  
15 indicated.

**Table S1:** Cytotoxicity of compound **20** on cell lines derived from pancreas cancer (PANC-1), metastatic melanoma (WM266-4), glioblastoma (U-87), leukemia (KG-1), lymphoma (Karpas299) and colon (HCT116) and cytotoxicity of compound **68** and **70** on cell lines derived from acute myeloid leukemia (KG-1) and colon carcinoma (HCT116). The mean EC<sub>50</sub> (μM) ± SE of two to three experiments is reported.

| <b>Cp<br/>ds</b> | <b>PANC<br/>-1</b> | <b>WM26<br/>6-4</b> | <b>U-87</b> | <b>KG-1</b> | <b>Karpa<br/>s 299</b> | <b>HCT1<br/>16</b> |
|------------------|--------------------|---------------------|-------------|-------------|------------------------|--------------------|
| <b>20</b>        | 1.2±0.4            | 4.0±0.3             | 0.9±0.1     | 0.5±0.1     | 1.8±0.6                | 0.5±0.2            |
| <b>68</b>        | ND                 | ND                  | ND          | 0.4±0.1     | ND                     | 0.7±0.1            |
| <b>70</b>        | ND                 | ND                  | ND          | 1.3±0.9     | ND                     | 0.6±0.3            |

*ND= Not determined*



### T<sub>m</sub> assay

DNA thermal denaturation experiments were conducted as described in (4). Hairpin DNA duplexes hp\_2\_CG (5'-TATATACCGTACCGTGTTTTTCACCGTACCGTTATATA-3') containing 2 CpG sites; hp\_1\_CG (5'-TATATACCGTACTGTGTTTTTCACAGTACCGTTATATA-3') containing 1 CpG site; and hp\_0\_CG (5'-TATATATGTACTGTGTTTTTCACAGTACATATATA-3') containing no CpG site, were used at 2  $\mu$ M in the absence or in the presence of the inhibitor in the T<sub>m</sub> assay buffer (100mM NaCl, Lithium cacodylate 20mM, pH 7.2). The temperature at which 50% of the duplex is denatured T<sub>m</sub> was calculated as previously described (4).

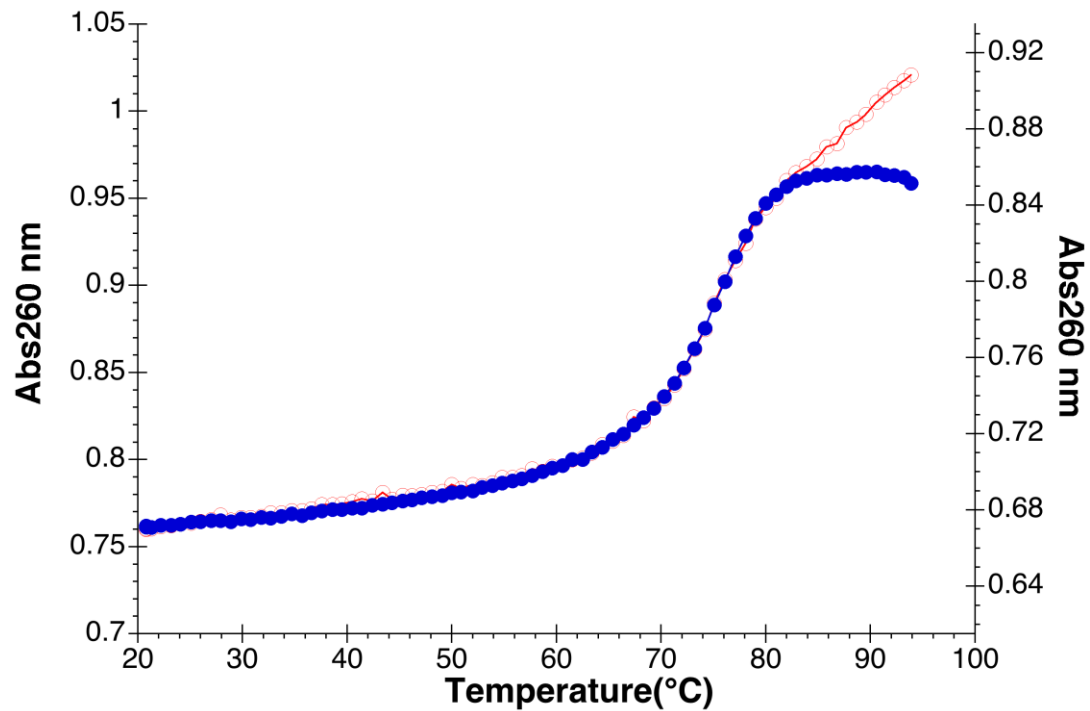

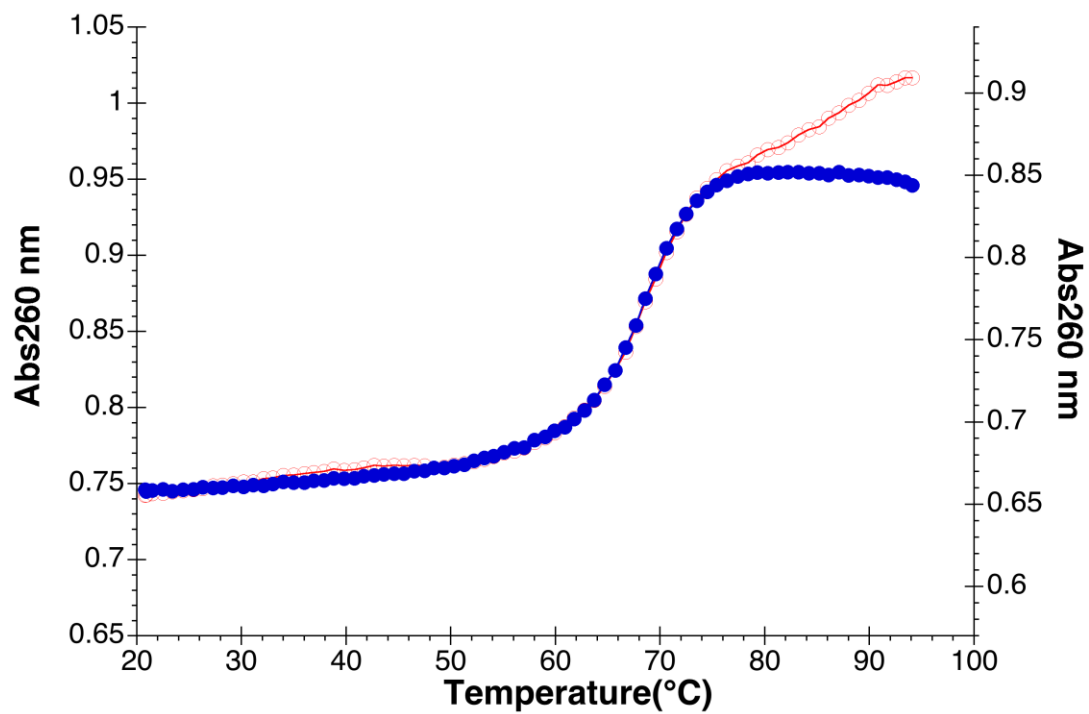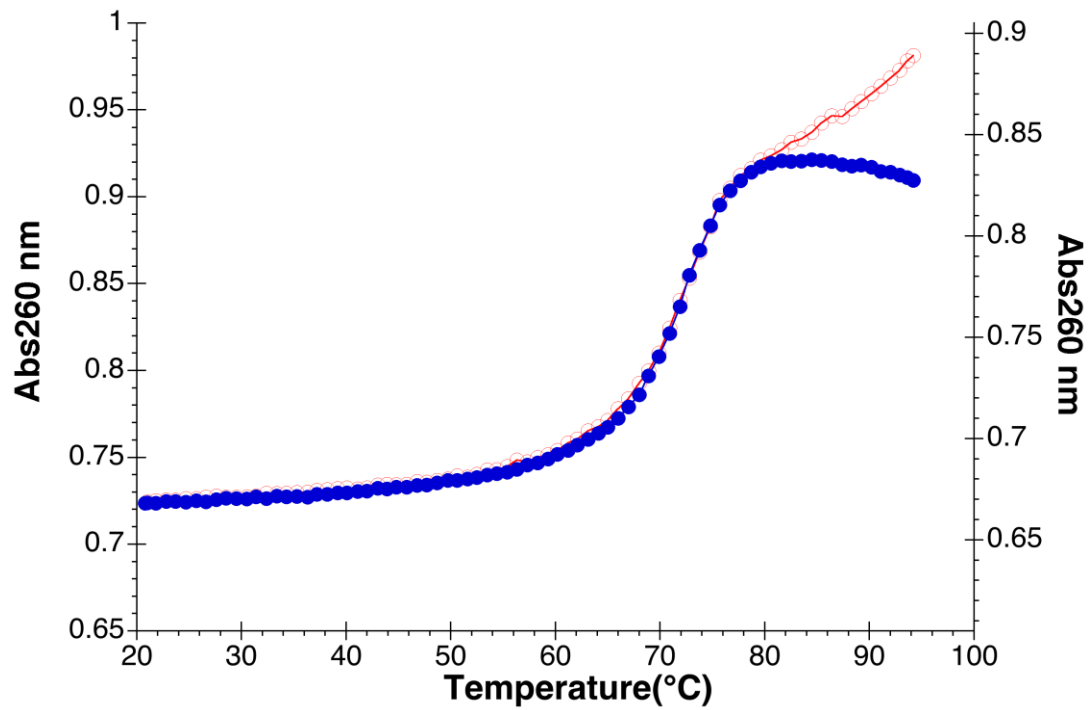

**Figure S1-** Melting curves measured at 260nm of 2 $\mu$ M hairpin duplex hp2 (top), hp1 (center) and hpctrl (bottom) in the absence (red circles, left Y axis) and in the presence of 10 $\mu$ M compound **20** (blue circles, right Y axis).

### **DNase I footprinting**

DNase I footprinting experiments were performed essentially as described in Lemster *et al.* (5). Briefly, the 117 and 265bp DNA fragments were obtained from *EcoRI* and *PvuII* double digestion of the pBS plasmid (Stratagene, La Jolla, CA) and were then 3'-end labeled using  $\alpha$ -<sup>32</sup>P]-dATP (3000 Ci/mmol, PerkinElmer, France). Increasing concentrations of the compound **20** were incubated with either 117bp or 265bp radiolabeled DNA fragments for 15min at 37°C to ensure equilibrium prior to the addition of 0.001unit/mL of DNase I in appropriate buffer for 3 min of digestion followed by ethanol precipitation. The digested DNAs were subsequently dissolved in 4μL of denaturing loading buffer (80% formamide solution containing tracking dyes), heated 4min at 90°C and chilled 4 min on ice prior to electrophoresis 90min at 65W on a 8% denaturing polyacrylamide gel in TBE buffer. Finally, gels were soaked in 10% acetic acid, dried under vacuum at 80°C on 3MM Whatman paper and revealed using PMI equipment (BioRad). The precise localization of each base was assigned relatively to the guanines sequencing standard (G-track) classically obtained using dimethyl-sulfate (DMS) and piperidine treatment of the same DNA fragment.

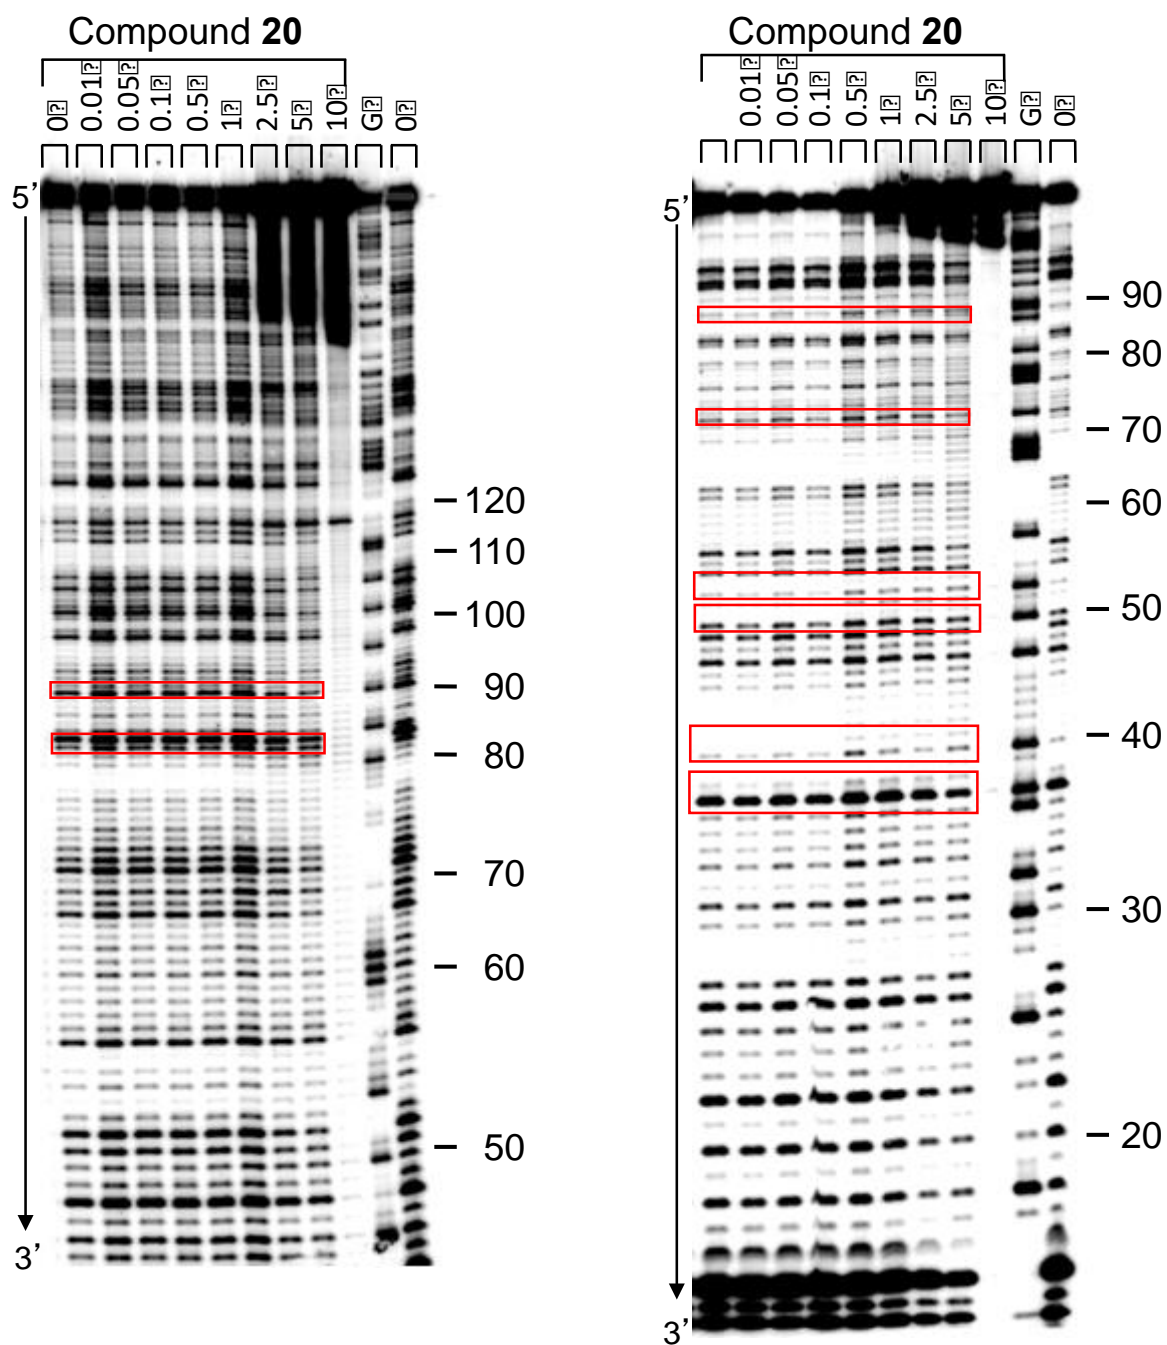

**Figure S2: DNase I footprinting gel analysis.** 265bp (**left**) or 117bp (**right**) radiolabeled DNA were incubated with increasing concentration ( $\mu$ M) of the compound **20** prior to mild DNase I digestion and separation of the digested fragments on a denaturing 8% polyacrylamide

gel. Red boxes localize CpG dinucleotides. G lanes highlights guanines using classic DMS-piperidine treatment.

## Luciferase Induction

To generate KG-1-Luc cells, KG-1 cells were stably transfected with the firefly luciferase (Luc+ from pGL3; Promega) reporter gene under the control of the cytomegalovirus (CMV) promoter (from pEGFP-N1; Clontech Laboratories Inc.) that was partially methylated (25 %).

5 KG-1-Luc cells were seeded at  $2 \cdot 10^4$  cells per well in a 96-wells plate. After 24 h incubation in the presence of the evaluated compound or solvent (DMSO or water), the luciferase induction was quantified with the Britelite™ assay system (PerkinElmer). The luminescence was measured on an EnVision multilabel plate reader (PerkinElmer), and the data are expressed as the fold induction as compared with the solvent control. The mean of three experiments and the  
10 standard error is reported.

**Table S2:** Reactivation Fold (RF) of the luciferase in the CMV-Luc KG-1 construction.

Luminescence was measured after 24h treatment of cells by 5azadC and compounds **20**, **29**, **68** and **70**. Luciferase RF was represented as ratio to non-treated cells.

| Cpds          | RF of the luciferase gene for concentration<br>( $\mu$ M) |           |           |           |           |
|---------------|-----------------------------------------------------------|-----------|-----------|-----------|-----------|
|               | 10                                                        | 5         | 3.2       | 1         | 0.1       |
| <b>5azadC</b> | 14.8                                                      | 15.1      | 17.3      | 16.2      | 9.2       |
|               | $\pm 2.9$                                                 | $\pm 3.0$ | $\pm 1.2$ | $\pm 3.1$ | $\pm 2.5$ |
| <b>20</b>     | 2.5                                                       | 4.7       | 2.7       | 0.8       | 0.9       |
|               | $\pm 1.1$                                                 | $\pm 1.3$ | $\pm 0.2$ | $\pm 0.2$ | $\pm 0.2$ |
| <b>68</b>     | 2.1                                                       | 4.2       | 5.0       | 4.1       | 2.7       |
|               | $\pm 0.2$                                                 | $\pm 0.1$ | $\pm 0.6$ | $\pm 0.3$ | $\pm 0.1$ |
| <b>70</b>     | 2.2                                                       | 4.3       | 1.4       | 1.6       | 1.8       |
|               | $\pm 0.8$                                                 | $\pm 0.7$ | $\pm 0.2$ | $\pm 0.4$ | $\pm 0.9$ |
| <b>29</b>     | 0.9                                                       | 0.9       | 0.9       | 0.9       | 1.2       |
|               | $\pm 0.0$                                                 | $\pm 0.0$ | $\pm 0.0$ | $\pm 0.1$ | $\pm 0.2$ |
|               | 5                                                         | 3         | 3         | 1         | 4         |

### **Nucleosome Occupancy and Methylome Sequencing (NOMe-Seq)**

After nuclei extraction, GpC methyltransferase (M.CviPI; New England Biolabs) reactions were done in M.CviPI reaction buffer. GpC methyltransferase treatment was followed by DNA extraction, sodium bisulfite conversion, PCR amplification of the region of interest, cloning, and sequencing of individual clones. KG-1-Luc cells treated with different conditions were centrifuged for 5 min at  $500 \times g$ . Cell pellets were washed in ice-cold PBS, resuspended in 1mL of ice-cold nuclei buffer [10mM Tris (pH 7.4), 10mM NaCl, 3mM MgCl<sub>2</sub>, 0.1mM EDTA, and 0.5% Nonidet P-40, protease inhibitors] per  $2 \times 10^6$  cells, and incubated on ice for 10 min. Nuclei were recovered by centrifugation at  $900 \times g$  for 5min, washed twice in nuclei wash buffer [10 mM Tris (pH 7.4), 10mM NaCl, 3mM MgCl<sub>2</sub>, and 0.1mM EDTA containing protease inhibitors], and resuspended with 200μL in  $1 \times$  M.CviPI reaction buffer supplemented with 0.3M sucrose, 160μM S-adenosyl-L-methionine (AdoMet, New England Biolabs). 100μL of purified genomic DNA were treated with 100 units of M.CviPI for 15 min at 37°C in 200μL final volume. The other part of 100μL of purified genomic DNA were not treated with 100 units of M.CviPI but only incubated for 15min at 37°C to obtain CpG methylation profile on the sequence of interest. Previous publications using locus-specific NOMe-seq have used the minimal amount of M.CviPI that resulted in optimal footprinting of the specific region of interest: 100 units, (6) 200 units, (7) or 200 + 100 units. (8) Reactions were stopped by the addition of an equal volume of stop solution [20mM Tris·HCl (pH 7.9), 600mM NaCl, 1% SDS, 10mM EDTA, and 400μg/mL Proteinase K] and incubated at 55°C overnight. DNA was purified by phenol/chloroform extraction and ethanol precipitation.



### **Combined Bisulfite Restriction Analysis (COBRA): primer design.**

Bisulfite-specific primers with a minimum length of 18bp were designed using Primer 3 program (9). The target sequence of the designed primers contained no CpGs allowing amplification of both un- and hypermethylated DNAs. All primers were tested for their ability to yield high quality sequences and primers that gave rise to an amplicon of the expected size using non-bisulfite treated DNA as a template were discarded, thus ensuring the specificity for bisulfite-converted DNAs.

#### **CDKN2A primers for COBRA :**

forward, 5'- GGTTTTTTTAGAGGATTTGAGGGATAGG-3'

reverse, 5'- CTACCTAATTCCAATTCCCCTACAAACTTC 3'

### **References:**

- (1) Ceccaldi, A.; Rajavelu, A.; Champion, C.; Rampon, C.; Jurkowska, R.; Jankevicius, G.; Senamaud-Beaufort, C.; Ponger, L.; Gagey, N.; Ali, H. D.; Tost, J.; Vrız, S.; Ros, S.; Dauzonne, D.; Jeltsch, A.; Guianvarc'h, D.; Arimondo, P. B. C5-DNA methyltransferase inhibitors: from screening to effects on zebrafish embryo development. *Chembiochem* **2011**, 12, 1337-1345
- (2) Rilova, E.; Erdmann, A.; Gros, C.; Masson, V.; Aussagues, Y.; Poughon-Cassaboïs, V.; Rajavelu, A.; Jeltsch, A.; Menon, Y.; Novosad, N.; Gregoire, J. M.; Vispe, S.; Schambel, P.; Ausseil, F.; Sautel, F.; Arimondo, P. B.; Cantagrel, F. Design, synthesis and biological evaluation of 4-amino-N- (4-aminophenyl)benzamide analogues of quinoline-based SGI-1027 as inhibitors of DNA methylation. *ChemMedChem* **2014**, 9, 590-601.

- (3) Gros, C.; Chauvigne, L.; Poulet, A.; Menon, Y.; Ausseil, F.; Dufau, I.; Arimondo, P. B. Development of a universal radioactive DNA methyltransferase inhibition test for high-throughput screening and mechanistic studies. *Nucleic Acids Res.* **2013**, 41, e185.
- (4) J. L Mergny and L. Lacroix. (2003) Analysis of thermal melting curves. *Oligonucleotides*. **13**, 515-537.
- (5) T. Lemster, U. Pindur, G. Lenglet, S. Depauw, C. Dassi and M.-H. David-Cordonnier. (2009) Photochemical electrocyclisation of 3-vinylindoles to pyrido[2,3-a]-, pyrido[4,3-a]-, and thieno[2,3-a]-carbazoles: design, synthesis, DNA binding and antitumor cell cytotoxicity. *Eur. J. Med. Chem.* **44**, 3235–3252.
- 10 (6) . M. Wolff, H. M. Byun, H. F. Han, S. Sharma, P. W. Nichols, K. D. Siegmund, A. S. Yang, P. A. Jones, G. Liang, *PLoS Genet* **2010**, 6, e1000917.
- (7) a) P. C. Taberlay, T. K. Kelly, C. C. Liu, J. S. You, D. D. De Carvalho, T. B. Miranda, X. J. Zhou, G. Liang, P. A. Jones, *Cell* **2011**, 147, 1283-1294; b) J. S. You, T. K. Kelly, D. D. De Carvalho, P. C. Taberlay, G. Liang, P. A. Jones, *Proc Natl Acad Sci U S A* **2011**, 108, 14497-14502.
- 15 (8) C. Andreu-Vieyra, J. Lai, B. P. Berman, B. Frenkel, L. Jia, P. A. Jones, G. A. Coetzee, *Mol Cell Biol* **2011**, 31, 4648-4662.
- (9) a) T. Koressaar, M. Remm, *Bioinformatics* **2007**, 23, 1289-1291; b) A. Untergasser, I. Cutcutache, T. Koressaar, J. Ye, B. C. Faircloth, M. Remm, S. G. Rozen, *Nucleic Acids Res* **2012**, 40, e115.
- 20
